# Supplementary material
Source: Royal Society of Chemistry journal article supplement (doi:10.1039/d6cc02321e)
Supplement: d6cc02321e1.pdf [file d6cc02321e1.pdf]

Electronic Supplementary Material (ESI) for Chem. Commun.

This journal is © The Royal Society of Chemistry 2026

## ***Electronic Supplementary Information***

### **Silver-Catalyzed Asymmetric [3+2] Cycloaddition via Dynamic Kinetic Resolution: Access to Chiral Oxazolines Bearing C–N Axial Chirality**

Jiayang Lv,<sup>a</sup> Zanjie Xu,<sup>a</sup> Zhengguo Deng,<sup>a</sup> Xinyu Chen,<sup>a</sup> Changdi Zheng,<sup>a</sup> Dingguo Song,<sup>\*b</sup> Fei Ling<sup>\*acd</sup>  
and Weihui Zhong<sup>\*acd</sup>

<sup>a</sup> Key Laboratory for Green Pharmaceutical Technologies and Related Equipment of Ministry of Education, College of Pharmaceutical Sciences, Zhejiang University of Technology, Hangzhou 310014, P.R. China

E-mail: [lingfei@zjut.edu.cn](mailto:lingfei@zjut.edu.cn); [weihuizhong@zjut.edu.cn](mailto:weihuizhong@zjut.edu.cn)

<sup>b</sup> Huzhou Key Laboratory of Medical and Environmental Applications Technologies, School of Life Sciences, Huzhou university, Huzhou 313000, P. R. China

E-mail: [03356@zjhu.edu.cn](mailto:03356@zjhu.edu.cn)

<sup>c</sup> Zhejiang Key Laboratory of Green Manufacturing Technology for Chemical Drugs, Zhejiang University of Technology, Hangzhou 310014, P.R. China

<sup>d</sup> State Key Laboratory of Green Chemical Synthesis and Conversion, Zhejiang University of Technology, Hangzhou 310014, P.R. China

### **Table of Contents**

|                                                                       |      |
|-----------------------------------------------------------------------|------|
| 1. General information.....                                           | S2   |
| 2. Optimization of the reaction conditions .....                      | S2   |
| 3. Synthesis and characterization of starting materials.....          | S3   |
| 4. General procedure for the synthesis of <b>3</b> and <b>5</b> ..... | S5   |
| 5. Gram-scale experiment and further transformations .....            | S5   |
| 6. Possible mechanism.....                                            | S7   |
| 7.Characterization data of products .....                             | S7   |
| 8. Investigation on the enantiomerization barrier .....               | S28  |
| 9. Crystallographic information.....                                  | S30  |
| 10. NMR spectra.....                                                  | S37  |
| 11.HPLC chromatograms .....                                           | S73  |
| 12. Reference .....                                                   | S109 |

## 1. General information

Commercial reagents were used without further purification, and solvents were dried before using. Melting points were determined using a Büchi B-540 capillary melting point apparatus. The  $^1\text{H}$  NMR spectra were recorded at 400 MHz. The  $^{13}\text{C}$  NMR spectra were recorded at 100 MHz. Chemical shifts were expressed in parts per million ( $\delta$ ) downfield from the internal standard tetramethylsilane, and were reported as s (singlet), d (doublet), t (triplet), dd (doublet of doublet), dt (doublet of triplet), td (triplet of doublet), m (multiplet), etc. The coupling constants  $J$  were given in Hz. HPLC analyses were performed on Agilent 1260 with Daicel chiral columns (IA, IC, ID, AS-H, OD-H, OJ-H and AD-H). The conversion of starting materials was monitored by thin layer chromatography (TLC) using silica gel plates (silica gel 60 F254 0.25 mm), and components were visualized by observation under UV light (254 and 365 nm). Optical rotations were determined using an AUTOPOL V polarimeter.

## 2. Optimization of the reaction conditions

Table S1. Optimization of reaction conditions<sup>a</sup>

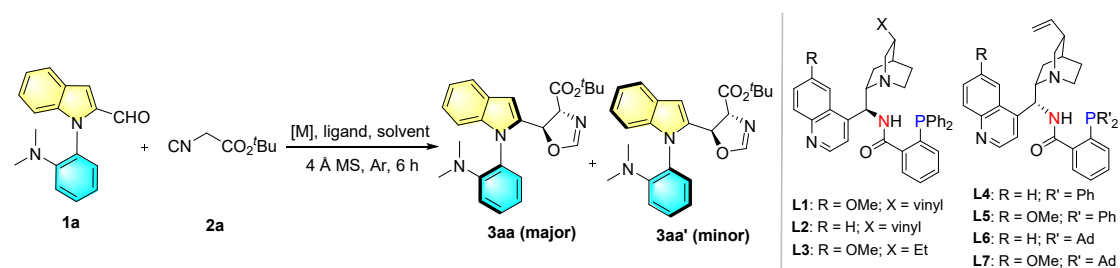

| Entry | Ligand | Temp. (°C) | [M]                             | Solvent | Yield <sup>b</sup> (%) | ee <sup>c</sup> (%) | dr <sup>d</sup> |
|-------|--------|------------|---------------------------------|---------|------------------------|---------------------|-----------------|
| 1     | L1     | -20        | Ag <sub>2</sub> CO <sub>3</sub> | EA      | 98                     | 99                  | 9:1             |
| 2     | L2     | -20        | Ag <sub>2</sub> CO <sub>3</sub> | EA      | 94                     | 96                  | 8:1             |
| 3     | L3     | -20        | Ag <sub>2</sub> CO <sub>3</sub> | EA      | 98                     | 97                  | 8:1             |
| 4     | L4     | -20        | Ag <sub>2</sub> CO <sub>3</sub> | EA      | 98                     | 95                  | 8:1             |
| 5     | L5     | -20        | Ag <sub>2</sub> CO <sub>3</sub> | EA      | 96                     | 95                  | 9:1             |
| 6     | L6     | -20        | Ag <sub>2</sub> CO <sub>3</sub> | EA      | 76                     | 56                  | 7:1             |
| 7     | L7     | -20        | Ag <sub>2</sub> CO <sub>3</sub> | EA      | 64                     | 63                  | 7:1             |
| 8     | L1     | -40        | Ag <sub>2</sub> CO <sub>3</sub> | EA      | trace                  | ND                  | ND              |

|    |    |    |                                   |         |    |    |      |
|----|----|----|-----------------------------------|---------|----|----|------|
| 9  | L1 | 0  | Ag <sub>2</sub> CO <sub>3</sub>   | EA      | 98 | 99 | 9:1  |
| 10 | L1 | RT | Ag <sub>2</sub> CO <sub>3</sub>   | EA      | 98 | 98 | 9:1  |
| 11 | L1 | 0  | Ag <sub>2</sub> CO <sub>3</sub>   | DCM     | 98 | 99 | 9:1  |
| 12 | L1 | 0  | Ag <sub>2</sub> CO <sub>3</sub>   | THF     | 98 | 99 | 9:1  |
| 13 | L1 | 0  | Ag <sub>2</sub> CO <sub>3</sub>   | MTBE    | 98 | 98 | 7:1  |
| 14 | L1 | 0  | Ag <sub>2</sub> CO <sub>3</sub>   | EA      | 98 | 99 | 9:1  |
| 15 | L1 | 0  | Ag <sub>2</sub> CO <sub>3</sub>   | Toluene | 98 | 99 | 3:1  |
| 16 | L1 | 0  | AgSO <sub>3</sub> CF <sub>3</sub> | EA      | 70 | 97 | 12:1 |
| 17 | L1 | 0  | Ag <sub>2</sub> SO <sub>4</sub>   | EA      | 98 | 98 | 9:1  |
| 18 | L1 | 0  | AgNO <sub>3</sub>                 | EA      | 91 | 97 | 9:1  |
| 19 | L1 | 0  | Ag <sub>2</sub> O                 | EA      | 98 | 99 | 11:1 |
| 20 | L1 | 0  | AgBF <sub>4</sub>                 | EA      | 72 | 90 | 15:1 |
| 21 | L1 | 0  | Ag <sub>3</sub> PO <sub>4</sub>   | EA      | 90 | 97 | 9:1  |
| 22 | L1 | 0  | CuI                               | EA      | 91 | 45 | 8:1  |

<sup>a</sup>Reaction conditions: **1a** (0.2 mmol), **2a** (0.24 mmol), [M] (0.005 mmol), ligand (0.011 mmol), 4 Å MS (200 mg) in EA (4 mL) under Ar for 6 h. <sup>b</sup>Isolated yields. <sup>c</sup>Determined by HPLC analysis. <sup>d</sup>Determined by HPLC analysis.

### 3. Synthesis and characterization of starting materials

#### 3.1 Synthesis of ligands

Ligands **L1-L7** were prepared according to literature procedures.<sup>1,2</sup>

#### 3.2 Synthesis of substrate **1a-1m**

Substrates **1a-1m** were prepared according to literature procedures.<sup>3</sup>

#### 3.3 Synthesis of substrate **2a-2f** and **4a-4m**

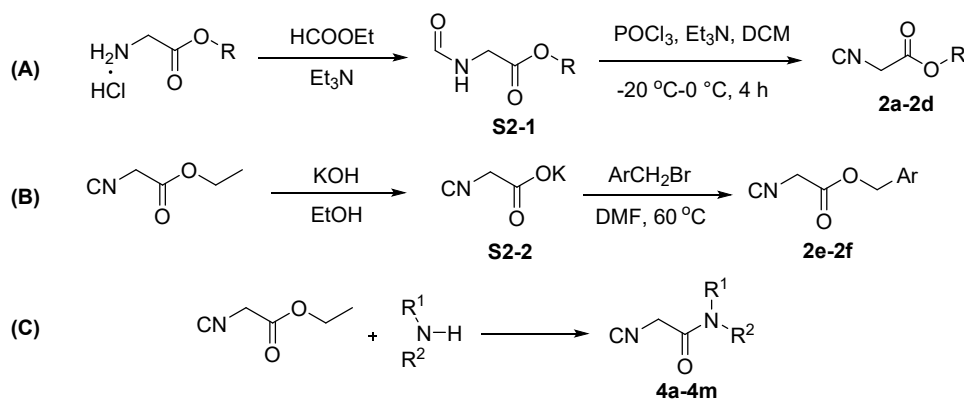

#### Procedure A<sup>4</sup>:

To a 100 mL three-necked flask flushed with Ar were added the corresponding glycinate hydrochloride (40 mmol, 1.0 equiv.), triethylamine (44 mmol, 1.1 equiv.), and ethyl formate (30

mL). The reaction mixture was refluxed at 65 °C for 24 h. Upon completion, the flask was cooled to -5 °C. The mixture was filtered while cold, and the filter cake was washed with EA. The filtrate was concentrated *in vacuo*, and the resulting crude residue was purified by flash column chromatography on silica gel, eluting with PE/EA (2:1) to afford **S2-1** as a colorless transparent liquid (78-86% yield).

To a 250 mL three-necked flask flushed with Ar were added **S2-1** (31.2 mmol, 1.0 equiv.), triethylamine (34.1 mmol, 1.1 equiv.), and DCM (50 mL). The flask was cooled to -20 °C, followed by the slow dropwise addition of phosphorus oxychloride (93.3 mmol, 3.0 equiv.) over approximately 30 min, during which a large amount of white solid was generated. After the addition, the mixture was warmed to 0 °C and stirred for 4 h, observing the solution turning dark. Upon completion, the reaction was quenched by the careful addition of saturated aqueous Na<sub>2</sub>CO<sub>3</sub> and the pH was adjusted to 9. The mixture was diluted with water and extracted with DCM (3 × 50 mL). The combined organic layers were washed once with brine, dried over anhydrous Na<sub>2</sub>SO<sub>4</sub>, and concentrated *in vacuo*. The crude residue was purified by flash column chromatography on silica gel, eluting with PE/EA (10:1) to afford **2a-2d** as a colorless transparent liquid (73-81% yield).

#### **Procedure B<sup>5,6</sup>:**

To a 100 mL round-bottom flask were added EtOH (15 mL) and KOH (10 mmol, 1.14 equiv.). After the mixture was completely dissolved, ethyl isocynoacetate (8.8 mmol, 1.0 equiv.) was added, resulting in the generation of a large amount of yellow solid. The reaction was stirred at 25 °C for 1 h. Upon completion, the mixture was filtered, and the filter cake was washed with EtOH to afford **S2-2** as a golden-yellow solid (98% yield).

To a 10 mL sealed tube flushed with Ar were added **S2-2** (5 mmol, 1.0 equiv.), DMF (3 mL), and ArCH<sub>2</sub>Br (5 mmol, 1.0 equiv.). The reaction mixture was stirred at 65 °C for 24 h. Upon completion, the solvent was removed *in vacuo*. The residue was diluted with water and extracted with EA (3 × 10 mL). The combined organic layers were washed once with brine, dried over anhydrous Na<sub>2</sub>SO<sub>4</sub>, and concentrated *in vacuo*. The crude product was purified by flash column chromatography on silica gel, eluting with PE/EA (8:1) to afford **2e-2f** (32-39% yield).

#### **Procedure C<sup>5,7</sup>:**

To a 5 mL reaction vial was added ethyl isocyanoacetate (5 mmol, 1.0 equiv.) and the corresponding amine (5 mmol, 1.0 equiv.). If the amine was a solid, MeOH (1 mL) was added as the solvent. The reaction mixture was stirred at 25 °C for 24 h. Upon completion, the mixture was cooled to -20 °C. The resulting precipitate was collected and washed with diethyl ether. In cases where no precipitate formed, the residue was purified by flash column chromatography on silica gel to afford the desired products (20-76% yield).

### 3.4 Synthesis of (Isocyanomethyl)diphenylphosphine oxide

(Isocyanomethyl)diphenylphosphine oxide was prepared according to literature procedures<sup>8</sup>.

## 4. General procedure for the synthesis of 3 and 5

### 4.1 General Procedure for the Synthesis of 3

To a dry 10 mL Schlenk tube under an Ar atmosphere were added **1** (0.2 mmol, 1.0 equiv.), Ag<sub>2</sub>O (0.005 mmol, 2.5 mol%), ligand **L1** (0.011 mmol, 5.5 mol%), 4 Å MS (200 mg), and EA (4 mL). The mixture was stirred at 25 °C for 30 min and then cooled to 0 °C. A solution of isocyanoacetate **2** (0.24 mmol) in EA (4 mL) was added dropwise via a syringe pump at a rate of 0.2 mL/5 min. The reaction was stirred at 0 °C for 6 h. Upon completion, the solvent was removed under reduced pressure. The residue was purified by flash column chromatography on silica gel (pre-neutralized with 1% Et<sub>3</sub>N in PE), eluting with PE/EA (10:1-1:1) to afford the desired product **3a**.

### 4.2 General Procedure for the Synthesis of 5

The reaction between *N*-aryl indole aldehydes **1** and isocyanoacetamides **4** followed the same procedure as described for **3**, with the reaction time extended to 18 h.

## 5. Gram-scale experiment and further transformations

### 5.1 Gram-scale Experiment

To a dry 100 mL double-neck flask under an Ar atmosphere were added **1a** (4 mmol, 1.06 g, 1.0 equiv.), Ag<sub>2</sub>O (0.1 mmol, 23.2 mg, 2.5 mol%), ligand **L1** (0.22 mmol, 134.1 mg, 5.5 mol%), 4 Å

MS (500 mg), and EA (20 mL). The mixture was stirred at 25 °C for 30 min and then cooled to 0 °C. A solution of **2b** (4.8 mmol) in EA (4 mL) was added dropwise via a syringe pump at a rate of 10 mL/h. The reaction was stirred at 0 °C for 6 h. Upon completion, the solvent was removed under reduced pressure. The residue was purified by flash column chromatography on silica gel (pre-neutralized with 1% Et<sub>3</sub>N in PE), eluting with PE/EA (5:1) to afford the desired product **3ab** (1.32 g, 91% yield, 98% ee, >20:1 dr).

### 5.2 Further Transformation of **7ab**<sup>1</sup>

To a 10 mL round-bottom flask under an Ar atmosphere were added **3ab** (0.15 mmol, 54 mg) and THF (2 mL). After complete dissolution, a solution of 5 drops of concentrated HCl (12 M) diluted in THF (2 mL) was added dropwise. A white solid was observed to form immediately, and the mixture was stirred for 1 h. The residue was quenched with saturated aqueous NaHCO<sub>3</sub> and extracted with EA and water. The aqueous phase was extracted with EA three times. The combined organic layers were washed with brine, dried over anhydrous Na<sub>2</sub>SO<sub>4</sub>, and concentrated. The residue was purified by flash column chromatography on silica gel, eluting with PE/EA (1:1) to afford the desired product **7ab** (48.5 mg, 85% yield, 97% ee, >20:1 dr).

### 5.3 Further transformation of **8ab**<sup>9</sup>

To a 10 mL Schlenk tube under an Ar atmosphere were added LiAlH<sub>4</sub> (5 mmol) and THF (3 mL). The mixture was cooled to -45 °C, and then a solution of **3ab** (1 mmol, 375 mg) in THF (3 mL) was added dropwise over approximately 30 min. The reaction was allowed to warm to 0 °C over 3 h and then stirred at room temperature overnight. Upon completion, the reaction was quenched by the sequential addition of H<sub>2</sub>O (0.2 mL), 15% aqueous NaOH (0.2 mL), and H<sub>2</sub>O (0.6 mL). The resulting mixture was filtered, and the filter cake was washed with EA. The organic phase was dried over anhydrous MgSO<sub>4</sub> and concentrated under reduced pressure. The residue was purified by flash column chromatography on silica gel, eluting with DCM/MeOH (20:1) to afford the desired product **8ab** (298 mg, 88% yield, 96% ee, >20:1 dr).

## 6. Possible mechanism

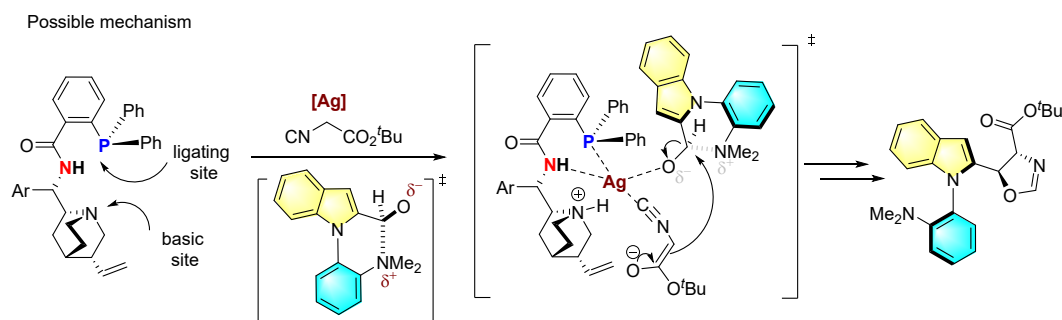

Based on our previous works and literature reports<sup>1,2,10-12</sup>, a plausible catalytic mechanism is proposed. The basic quinuclidine nitrogen of the cinchona alkaloid-derived ligand L1 facilitates the deprotonation of the  $\alpha$ -H of isocyanacetates. Simultaneously, the silver center is coordinated by the phosphorus and nitrogen atoms of the ligand, as well as the carbon atom of the isocyanide group, forming a rigid chiral environment. This multi-point coordination, along with potential interactions involving the substrate's carbonyl oxygen, effectively locks the spatial orientation of the reactants. Crucially, this assembly disrupts the transient intramolecular LABI within the N-aryl indole substrate, which otherwise lead to racemization. By suppressing this racemization process during the [3+2] cycloaddition, the strategy facilitates the simultaneous and efficient construction of both the C–N chiral axis and the adjacent stereogenic centers.

## 7. Characterization data of products

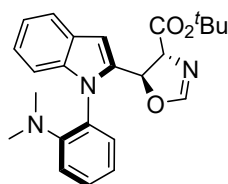

### **(*S*<sub>a</sub>,*4R*<sub>c</sub>,*5R*<sub>c</sub>)-tert-butyl 5-(1-(2-(dimethylamino)phenyl)-1*H*-indol-2-yl)-4,5-dihydrooxazole-4-carboxylate (3a)**

The desired product was purified by silica gel chromatography (PE/EA = 10:1) as pale yellow liquid (79.4 mg, 98% yield, 99% ee, 12:1 dr),  $[\alpha]_D^{20} = -108.0$  ( $c = 0.2$ , CH<sub>2</sub>Cl<sub>2</sub>). The ee was determined by HPLC on Chiralpak AD-H column, hexane: isopropanol = 90:10; flow rate = 1 mL/min; column temperature 25 °C; UV detection at 254 nm;  $t_{R1} = 6.70$  min (minor),  $t_{R2} = 7.76$  min (major),  $t_{R3} = 11.30$  min (minor). **<sup>1</sup>H NMR** (400 MHz, DMSO-*d*<sub>6</sub>)  $\delta$  7.62 – 7.58 (m, 1H), 7.45 – 7.38 (m, 2H),

7.23 (dd,  $J = 7.6, 1.6$  Hz, 1H), 7.16 (dd,  $J = 8.0, 1.2$  Hz, 1H), 7.14 – 7.09 (m, 2H), 7.08 – 7.05 (m, 1H), 6.99 (dd,  $J = 8.0, 1.6$  Hz, 1H), 6.66 (s, 1H), 5.80 (d,  $J = 6.0$  Hz, 1H), 4.37 (dd,  $J = 6.0, 2.0$  Hz, 1H), 2.32 (s, 6H), 1.27 (s, 9H).  **$^{13}\text{C NMR}$**  (100 MHz, DMSO- $d_6$ )  $\delta$  169.0, 156.7, 149.7, 138.7, 138.1, 130.9, 130.2, 127.6, 127.3, 123.0, 121.7, 121.0, 120.8, 120.0, 110.7, 101.0, 82.0, 75.7, 74.7, 42.1, 27.9. **HRMS (ESI)**  $m/z$  calcd for  $\text{C}_{24}\text{H}_{27}\text{N}_3\text{O}_3$   $[\text{M}+\text{H}]^+$ : 406.2125, found: 406.2122.

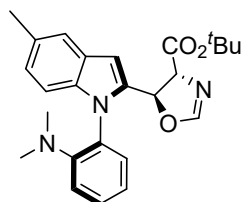

**( $S_a,4R_c,5R_c$ )-tert-butyl 5-(1-(2-(dimethylamino)phenyl)-5-methyl-1H-indol-2-yl)-4,5-dihydrooxazole-4-carboxylate (3ba)**

The desired product was purified by silica gel chromatography (PE/EA = 10:1) as pale yellow liquid (78.8 mg, 94% yield, 98% ee, 14:1 dr),  $[\alpha]_D^{20} = -197.0$  ( $c = 0.2$ ,  $\text{CH}_2\text{Cl}_2$ ). The ee was determined by HPLC on Chiralpak ID column, hexane: isopropanol = 97:3; flow rate = 1 mL/min; column temperature 25 °C; UV detection at 254 nm;  $t_{R1} = 14.91$  min (major),  $t_{R2} = 18.63$  min (minor),  $t_{R3} = 23.03$  min (minor),  $t_{R4} = 29.08$  min (minor).  **$^1\text{H NMR}$**  (400 MHz, DMSO- $d_6$ )  $\delta$  7.42 – 7.36 (m, 3H), 7.19 (dd,  $J = 7.6, 1.6$  Hz, 1H), 7.14 (dd,  $J = 8.4, 1.2$  Hz, 1H), 7.05 (td,  $J = 7.6, 1.2$  Hz, 1H), 6.95 (dd,  $J = 8.4, 1.6$  Hz, 1H), 6.87 (d,  $J = 8.4$  Hz, 1H), 6.57 (s, 1H), 5.79 (d,  $J = 6.0$  Hz, 1H), 4.36 (dd,  $J = 6.0, 2.0$  Hz, 1H), 2.37 (s, 3H), 2.32 (s, 6H), 1.27 (s, 9H).  **$^{13}\text{C NMR}$**  (100 MHz, DMSO- $d_6$ )  $\delta$  169.0, 156.7, 149.6, 138.6, 136.6, 130.8, 130.1, 129.4, 127.8, 127.4, 124.5, 121.6, 120.6, 119.6, 110.4, 100.6, 81.9, 75.7, 74.8, 42.0, 27.9, 21.5. **HRMS (ESI)**  $m/z$  calcd for  $\text{C}_{25}\text{H}_{29}\text{N}_3\text{O}_3$   $[\text{M}+\text{H}]^+$ : 420.2282, found: 420.2285.

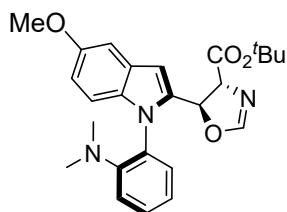

**( $S_a,4R_c,5R_c$ )-tert-butyl 5-(1-(2-(dimethylamino)phenyl)-5-methoxy-1H-indol-2-yl)-4,5-dihydrooxazole-4-carboxylate (3ca)**

The desired product was purified by silica gel chromatography (PE/EA = 10:1) as pale yellow liquid (86.1 mg, 99% yield, 99% ee, 7:1 dr),  $[\alpha]^{20}_{\text{D}} = -234.0$  ( $c = 0.2$ ,  $\text{CH}_2\text{Cl}_2$ ). The ee was determined by HPLC on Chiralpak AD-H column, hexane: isopropanol = 90:10; flow rate = 1 mL/min; column temperature 25 °C; UV detection at 254 nm;  $t_{\text{R}1} = 7.52$  min (minor),  $t_{\text{R}2} = 10.43$  min (major),  $t_{\text{R}3} = 12.97$  min (minor),  $t_{\text{R}4} = 13.77$  min (minor).  **$^1\text{H NMR}$**  (400 MHz,  $\text{DMSO-}d_6$ )  $\delta$  7.43 – 7.37 (m, 2H), 7.20 (dd,  $J = 7.6, 1.6$  Hz, 1H), 7.14 (dd,  $J = 8.4, 1.2$  Hz, 1H), 7.10 (d,  $J = 2.8$  Hz, 1H), 7.05 (td,  $J = 7.2, 1.2$  Hz, 1H), 6.88 (d,  $J = 9.2$  Hz, 1H), 6.77 (dd,  $J = 8.8, 2.4$  Hz, 1H), 6.58 (s, 1H), 5.76 (d,  $J = 6.0$  Hz, 1H), 4.37 (dd,  $J = 6.4, 2.4$  Hz, 1H), 3.76 (s, 3H), 2.32 (s, 6H), 1.27 (s, 9H).  **$^{13}\text{C NMR}$**  (100 MHz,  $\text{DMSO-}d_6$ )  $\delta$  169.0, 156.7, 154.7, 149.6, 138.9, 133.2, 130.8, 130.1, 128.0, 127.3, 121.6, 119.5, 113.0, 111.5, 102.7, 100.9, 82.0, 75.7, 74.8, 55.8, 42.0, 27.9. **HRMS (ESI)**  $m/z$  calcd for  $\text{C}_{25}\text{H}_{29}\text{N}_3\text{O}_4$   $[\text{M}+\text{H}]^+$ : 436.2231, found: 436.2228.

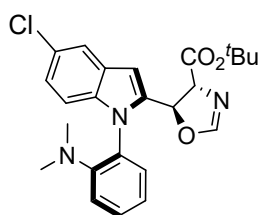

**( $S_a,4R_c,5R_e$ )-tert-butyl 5-(5-chloro-1-(2-(dimethylamino)phenyl)-1H-indol-2-yl)-4,5-dihydrooxazole-4-carboxylate (3da)**

The desired product was purified by silica gel chromatography (PE/EA = 10:1) as pale yellow liquid (81.6 mg, 93% yield, 99% ee, 7:1 dr),  $[\alpha]^{20}_{\text{D}} = -143.0$  ( $c = 0.2$ ,  $\text{CH}_2\text{Cl}_2$ ). The ee was determined by HPLC on Chiralpak IC column, hexane: isopropanol = 85:15; flow rate = 1 mL/min; column temperature 25 °C; UV detection at 254 nm;  $t_{\text{R}1} = 7.59$  min (minor),  $t_{\text{R}2} = 8.23$  min (minor),  $t_{\text{R}3} = 9.81$  min (minor),  $t_{\text{R}4} = 11.56$  min (major).  **$^1\text{H NMR}$**  (400 MHz,  $\text{DMSO-}d_6$ )  $\delta$  7.66 (d,  $J = 2.0$  Hz, 1H), 7.49 – 7.39 (m, 2H), 7.25 (dd,  $J = 8.0, 2.0$  Hz, 1H), 7.17 (dd,  $J = 8.4, 1.6$  Hz, 1H), 7.14 (dt,  $J = 8.8, 1.2$  Hz, 1H), 7.08 (td,  $J = 7.6, 1.6$  Hz, 1H), 6.99 (d,  $J = 8.8$  Hz, 1H), 6.66 (d,  $J = 0.8$  Hz, 1H), 5.80 (d,  $J = 6.0$  Hz, 1H), 4.36 (dd,  $J = 6.0, 1.6$  Hz, 1H), 2.32 (s, 6H), 1.26 (s, 9H).  **$^{13}\text{C NMR}$**  (100 MHz,  $\text{DMSO-}d_6$ )  $\delta$  168.8, 156.6, 149.6, 140.4, 136.6, 130.8, 130.5, 128.7, 126.9, 125.4, 123.0, 121.9, 120.2, 119.8, 112.3, 100.7, 82.0, 75.5, 74.7, 42.1, 27.9. **HRMS (ESI)**  $m/z$  calcd for  $\text{C}_{24}\text{H}_{26}\text{ClN}_3\text{O}_3$   $[\text{M}+\text{H}]^+$ : 440.1735, found: 440.1738.

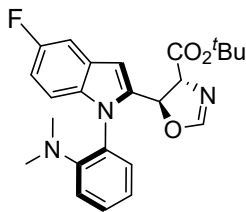

**(*S<sub>a</sub>,4R<sub>c</sub>,5R<sub>c</sub>*)-tert-butyl 5-(1-(2-(dimethylamino)phenyl)-5-fluoro-1*H*-indol-2-yl)-4,5-dihydrooxazole-4-carboxylate (3ea)**

The desired product was purified by silica gel chromatography (PE/EA = 10:1) as pale yellow liquid (81.2 mg, 96% yield, 99% ee, 6:1 dr),  $[\alpha]_D^{20} = -158.0$  ( $c = 0.2$ ,  $\text{CH}_2\text{Cl}_2$ ). The ee was determined by HPLC on Chiralpak IC column, hexane: isopropanol = 97:3; flow rate = 1 mL/min; column temperature 25 °C; UV detection at 254 nm;  $t_{R1} = 16.77$  min (minor),  $t_{R2} = 19.09$  min (minor),  $t_{R3} = 28.52$  min (minor),  $t_{R4} = 31.80$  min (major). **<sup>1</sup>H NMR** (400 MHz,  $\text{DMSO-}d_6$ )  $\delta$  7.45 – 7.40 (m, 2H), 7.40 – 7.36 (m, 1H), 7.24 (dd,  $J = 7.6, 1.6$  Hz, 1H), 7.16 (dd,  $J = 8.4, 1.2$  Hz, 1H), 7.07 (td,  $J = 7.2, 1.2$  Hz, 1H), 6.99 – 6.93 (m, 2H), 6.66 (s, 1H), 5.80 (d,  $J = 6.0$  Hz, 1H), 4.37 (dd,  $J = 6.0, 2.0$  Hz, 1H), 2.32 (s, 6H), 1.26 (s, 9H). **<sup>13</sup>C NMR** (100 MHz,  $\text{DMSO-}d_6$ )  $\delta$  168.9, 158.1 (d,  $J = 231.8$  Hz) 156.6, 149.6, 140.5, 134.8, 130.8, 130.4, 127.9 (d,  $J = 10.6$  Hz), 127.1, 121.8, 119.7, 111.8 (d,  $J = 9.8$  Hz), 111.1 (d,  $J = 26.0$  Hz), 105.8 (d,  $J = 23.3$  Hz), 101.0 (d,  $J = 4.6$  Hz), 82.0, 75.5, 74.7, 42.0, 27.9. **<sup>19</sup>F NMR** (376 MHz,  $\text{DMSO-}d_6$ )  $\delta$  -123.66. **HRMS (ESI)**  $m/z$  calcd for  $\text{C}_{24}\text{H}_{26}\text{FN}_3\text{O}_3$   $[\text{M}+\text{H}]^+$ : 424.2031, found: 424.2035.

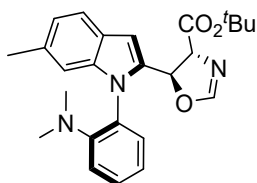

**(*S<sub>a</sub>,4R<sub>c</sub>,5R<sub>c</sub>*)-tert-butyl 5-(1-(2-(dimethylamino)phenyl)-6-methyl-1*H*-indol-2-yl)-4,5-dihydrooxazole-4-carboxylate (3fa)**

The desired product was purified by silica gel chromatography (PE/EA = 10:1) as pale yellow liquid (82.1 mg, 98% yield, 99% ee, 12:1 dr),  $[\alpha]_D^{20} = -162.0$  ( $c = 0.2$ ,  $\text{CH}_2\text{Cl}_2$ ). The ee was determined by HPLC on Chiralpak ID column, hexane: isopropanol = 92:8; flow rate = 1 mL/min; column temperature 25 °C; UV detection at 254 nm;  $t_{R1} = 8.57$  min (major),  $t_{R2} = 10.71$  min (minor),  $t_{R3} = 11.51$  min (minor),  $t_{R4} = 13.68$  min (minor). **<sup>1</sup>H NMR** (400 MHz,  $\text{DMSO-}d_6$ )  $\delta$  7.47 (d,  $J = 8.0$  Hz, 1H), 7.43 – 7.36 (m, 2H), 7.20 (dd,  $J = 7.6, 1.6$  Hz, 1H), 7.14 (dd,  $J = 8.4, 1.2$  Hz, 1H), 7.06 (td,  $J$

= 7.6, 1.6 Hz, 1H), 6.92 (dd,  $J = 8.4, 1.6$  Hz, 1H), 6.79 (s, 1H), 6.59 (s, 1H), 5.78 (d,  $J = 6.0$  Hz, 1H), 4.34 (dd,  $J = 6.0, 2.0$  Hz, 1H), 2.33 (s, 6H), 2.31 (s, 3H), 1.27 (s, 9H).  **$^{13}\text{C}$  NMR** (100 MHz, DMSO- $d_6$ )  $\delta$  169.0, 156.7, 149.7, 138.6, 138.0, 132.3, 130.9, 130.1, 127.3, 125.4, 122.5, 121.7, 120.7, 119.6, 110.4, 100.9, 81.9, 75.7, 74.7, 42.0, 27.9, 21.9. **HRMS (ESI)**  $m/z$  calcd for  $\text{C}_{25}\text{H}_{29}\text{N}_3\text{O}_3$   $[\text{M}+\text{H}]^+$ : 420.2282, found: 420.2275.

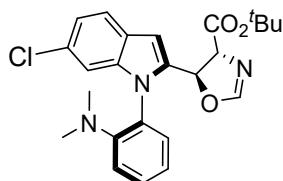

**( $S_a,4R_c,5R_e$ )-tert-butyl 5-(6-chloro-1-(2-(dimethylamino)phenyl)-1H-indol-2-yl)-4,5-dihydrooxazole-4-carboxylate (3ga)**

The desired product was purified by silica gel chromatography (PE/EA = 10:1) as pale yellow liquid (86.0 mg, 98% yield, 94% ee, 6:1 dr),  $[\alpha]_D^{20} = -168.0$  ( $c = 0.2$ ,  $\text{CH}_2\text{Cl}_2$ ). The ee was determined by HPLC on Chiralpak ID column, hexane: isopropanol = 92:8; flow rate = 1 mL/min; column temperature 25 °C; UV detection at 254 nm;  $t_{R1} = 8.06$  min (major),  $t_{R2} = 9.41$  min (minor),  $t_{R3} = 12.83$  min (minor),  $t_{R4} = 18.61$  min (minor).  **$^1\text{H}$  NMR** (400 MHz, DMSO- $d_6$ )  $\delta$  7.62 (d,  $J = 8.8$  Hz, 1H), 7.47 – 7.42 (m, 1H), 7.40 (d,  $J = 2.0$  Hz, 1H), 7.26 (dd,  $J = 8.0, 1.6$  Hz, 1H), 7.17 (dd,  $J = 8.4, 1.2$  Hz, 1H), 7.13 – 7.05 (m, 2H), 6.96 (s, 1H), 6.71 (s, 1H), 5.80 (d,  $J = 6.0$  Hz, 1H), 4.39 (dd,  $J = 6.0, 2.0$  Hz, 1H), 2.33 (s, 6H), 1.27 (s, 9H).  **$^{13}\text{C}$  NMR** (100 MHz, DMSO- $d_6$ )  $\delta$  168.8, 156.6, 149.6, 139.9, 138.5, 130.7, 130.5, 127.7, 126.7, 126.4, 122.5, 121.9, 121.2, 119.8, 110.3, 101.3, 82.0, 75.4, 74.6, 42.1, 27.9. **HRMS (ESI)**  $m/z$  calcd for  $\text{C}_{24}\text{H}_{26}\text{ClN}_3\text{O}_3$   $[\text{M}+\text{H}]^+$ : 440.1735, found: 440.1729.

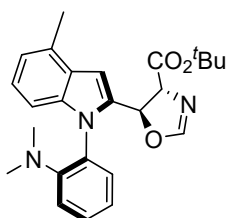

**( $S_a,4R_c,5R_e$ )-tert-butyl 5-(1-(2-(dimethylamino)phenyl)-4-methyl-1H-indol-2-yl)-4,5-dihydrooxazole-4-carboxylate (3ha)**

The desired product was purified by silica gel chromatography (PE/EA = 10:1) as pale yellow liquid (82.1 mg, 98% yield, 97% ee, 10:1 dr),  $[\alpha]_D^{20} = -132.0$  ( $c = 0.2$ ,  $\text{CH}_2\text{Cl}_2$ ). The ee was determined

by HPLC on Chiralpak IC column, hexane: isopropanol = 97:3; flow rate = 0.8 mL/min; column temperature 25 °C; UV detection at 254 nm;  $t_{R1}$  = 13.42 min (minor),  $t_{R2}$  = 16.30 min (minor),  $t_{R3}$  = 28.95 min (minor),  $t_{R4}$  = 29.79 min (major). **<sup>1</sup>H NMR** (400 MHz, DMSO-*d*<sub>6</sub>) δ 7.45 – 7.37 (m, 2H), 7.20 – 7.12 (m, 2H), 7.09 – 6.98 (m, 2H), 6.89 (d, *J* = 7.2 Hz, 1H), 6.80 (d, *J* = 8.4 Hz, 1H), 6.70 (s, 1H), 5.80 (d, *J* = 6.4 Hz, 1H), 4.38 (dd, *J* = 6.0, 2.0 Hz, 1H), 2.49 (s, 3H), 2.32 (s, 6H), 1.27 (s, 9H). **<sup>13</sup>C NMR** (100 MHz, DMSO-*d*<sub>6</sub>) δ 169.0, 156.7, 149.7, 138.1, 137.9, 130.9, 130.1, 130.0, 127.5, 127.4, 123.1, 121.7, 120.9, 119.6, 108.3, 99.7, 81.9, 75.7, 74.8, 42.1, 27.9, 18.8. **HRMS (ESI)** *m/z* calcd for C<sub>25</sub>H<sub>29</sub>N<sub>3</sub>O<sub>3</sub> [M+H]<sup>+</sup>: 420.2282, found: 420.2276.

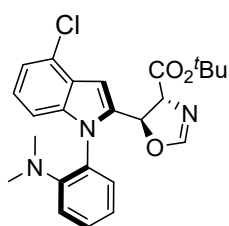

**(*S*<sub>a</sub>,4*R*<sub>c</sub>,5*R*<sub>e</sub>)-tert-butyl 5-(4-chloro-1-(2-(dimethylamino)phenyl)-1*H*-indol-2-yl)-4,5-dihydrooxazole-4-carboxylate (3ia)**

The desired product was purified by silica gel chromatography (PE/EA = 10:1) as pale yellow liquid (86.0 mg, 98% yield, 98% ee, 7:1 dr),  $[\alpha]^{20}_D = -118.0$  (*c* = 0.2, CH<sub>2</sub>Cl<sub>2</sub>). The ee was determined by HPLC on Chiralpak ID column, hexane: isopropanol = 95:5; flow rate = 1 mL/min; column temperature 25 °C; UV detection at 254 nm;  $t_{R1}$  = 10.14 min (minor),  $t_{R2}$  = 11.02 min (major),  $t_{R3}$  = 13.08 min (minor),  $t_{R4}$  = 15.50 min (minor). **<sup>1</sup>H NMR** (400 MHz, DMSO-*d*<sub>6</sub>) δ 7.47 – 7.41 (m, 2H), 7.27 (dd, *J* = 8.0, 2.0 Hz, 1H), 7.20 – 7.16 (m, 2H), 7.14 (d, *J* = 8.0 Hz, 1H), 7.12 – 7.08 (m, 1H), 6.97 (dt, *J* = 7.6, 1.2 Hz, 1H), 6.68 (d, *J* = 1.2 Hz, 1H), 5.83 (d, *J* = 6.0 Hz, 1H), 4.38 (dd, *J* = 5.6, 2.0 Hz, 1H), 2.33 (s, 6H), 1.26 (s, 9H). **<sup>13</sup>C NMR** (100 MHz, DMSO-*d*<sub>6</sub>) δ 168.8, 156.6, 149.6, 140.1, 138.9, 130.8, 130.6, 126.9, 126.1, 125.0, 123.9, 122.0, 120.5, 120.0, 109.9, 98.8, 82.0, 75.4, 74.6, 42.1, 27.9. **HRMS (ESI)** *m/z* calcd for C<sub>24</sub>H<sub>26</sub>ClN<sub>3</sub>O<sub>3</sub> [M+H]<sup>+</sup>: 440.1735, found: 440.1745.

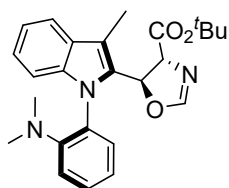

**(*S*<sub>a</sub>,4*R*<sub>c</sub>,5*R*<sub>e</sub>)-tert-butyl 5-(1-(2-(dimethylamino)phenyl)-3-methyl-1*H*-indol-2-yl)-4,5-dihydrooxazole-4-carboxylate (3ja)**

The desired product was purified by silica gel chromatography (PE/EA = 10:1) as pale yellow liquid (83.0 mg, 99% yield, 99% ee, 3:1 dr),  $[\alpha]_D^{20} = -95.0$  ( $c = 0.2$ ,  $\text{CH}_2\text{Cl}_2$ ). The ee was determined by HPLC on Chiralpak IC column, hexane: isopropanol = 90:10; flow rate = 1 mL/min; column temperature 25 °C; UV detection at 254 nm;  $t_{R1} = 7.04$  min (minor),  $t_{R2} = 8.36$  min (minor),  $t_{R3} = 13.28$  min (major),  $t_{R4} = 15.14$  min (minor). **<sup>1</sup>H NMR** (400 MHz,  $\text{DMSO}-d_6$ )  $\delta$  7.61 (m, 1H), 7.40 – 7.33 (m, 2H), 7.17 – 7.11 (m, 3H), 7.06 (m, 1H), 7.03 – 6.95 (m, 1H), 6.93 – 6.89 (m, 1H), 5.49 (d,  $J = 7.6$  Hz, 1H), 4.60 (dd,  $J = 7.6, 2.0$  Hz, 1H), 2.32 (s, 6H), 2.24 (s, 3H), 1.28 (s, 9H). **<sup>13</sup>C NMR** (100 MHz,  $\text{DMSO}-d_6$ )  $\delta$  169.6, 156.8, 150.0, 136.8, 132.9, 131.3, 130.0, 128.7, 127.1, 123.4, 121.3, 120.2, 119.2, 119.2, 111.2, 110.9, 82.0, 75.9, 74.5, 42.1, 27.8, 8.9. **HRMS (ESI)**  $m/z$  calcd for  $\text{C}_{25}\text{H}_{29}\text{N}_3\text{O}_3$   $[\text{M}+\text{H}]^+$ : 420.2282, found: 420.2291.

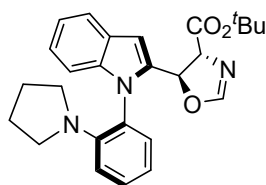

**(*S<sub>a</sub>,4R<sub>c</sub>,5R<sub>e</sub>*)-tert-butyl 5-(1-(2-(pyrrolidin-1-yl)phenyl)-1*H*-indol-2-yl)-4,5-dihydrooxazole-4-carboxylate (3ka)**

The desired product was purified by silica gel chromatography (PE/EA = 10:1) as pale yellow liquid (81.9 mg, 95% yield, 98% ee, 2.4:1 dr),  $[\alpha]_D^{20} = -194.0$  ( $c = 0.2$ ,  $\text{CH}_2\text{Cl}_2$ ). The ee was determined by HPLC on Chiralpak ID column, hexane: isopropanol = 92:8; flow rate = 1 mL/min; column temperature 25 °C; UV detection at 254 nm;  $t_{R1} = 10.50$  min (major),  $t_{R2} = 12.20$  min (minor),  $t_{R3} = 14.11$  min (minor),  $t_{R4} = 17.99$  min (minor). **<sup>1</sup>H NMR** (400 MHz,  $\text{DMSO}-d_6$ )  $\delta$  7.59 (d,  $J = 7.2$  Hz, 1H), 7.40 – 7.24 (m, 2H), 7.19 – 7.03 (m, 3H), 7.00 – 6.92 (dd,  $J = 8.4, 2.4$  Hz, 2H), 6.81 (d,  $J = 9.2$  Hz, 1H), 6.69 (s, 1H), 5.61 (d,  $J = 6.8$  Hz, 1H), 4.58 (dd,  $J = 6.8, 2.0$  Hz, 1H), 2.76 – 2.53 (m, 4H), 1.65 – 1.51 (m, 4H), 1.32 (s, 9H). **<sup>13</sup>C NMR** (100 MHz,  $\text{DMSO}-d_6$ )  $\delta$  169.2, 156.4, 146.6, 139.6, 139.2, 131.5, 130.2, 127.2, 123.2, 122.3, 121.2, 120.7, 118.1, 116.6, 111.0, 101.6, 82.0, 75.4, 74.4, 48.7, 27.9, 25.3. **HRMS (ESI)**  $m/z$  calcd for  $\text{C}_{26}\text{H}_{29}\text{N}_3\text{O}_3$   $[\text{M}+\text{H}]^+$ : 432.2282, found: 433.2276.

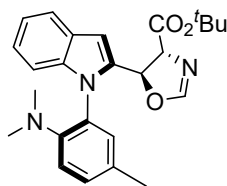

**(*S*,*4R*,*5R*)-*tert*-butyl 5-(1-(2-(dimethylamino)-5-methylphenyl)-1*H*-indol-2-yl)-4,5-dihydrooxazole-4-carboxylate (3la)**

The desired product was purified by silica gel chromatography (PE/EA = 10:1) as pale yellow liquid (83.0 mg, 99% yield, 99% ee, 10:1 dr),  $[\alpha]_D^{20} = -127.0$  ( $c = 0.2$ ,  $\text{CH}_2\text{Cl}_2$ ). The ee was determined by HPLC on Chiralpak ID column, hexane: isopropanol = 90:10; flow rate = 1 mL/min; column temperature 25 °C; UV detection at 254 nm;  $t_{R1} = 9.13$  min (major),  $t_{R2} = 10.42$  min (minor),  $t_{R3} = 11.59$  min (minor),  $t_{R4} = 14.31$  min (minor). **<sup>1</sup>H NMR** (400 MHz,  $\text{DMSO-}d_6$ )  $\delta$  7.62 – 7.57 (m, 1H), 7.42 (d,  $J = 2.0$  Hz, 1H), 7.23 (dd,  $J = 8.4, 2.0$  Hz, 1H), 7.13 – 7.05 (m, 4H), 7.01 (dd,  $J = 7.6, 1.6$  Hz, 1H), 6.64 (s, 1H), 5.83 (d,  $J = 6.0$  Hz, 1H), 4.34 (dd,  $J = 6.0, 2.0$  Hz, 1H), 2.29 (s, 6H), 2.28 (s, 3H), 1.27 (s, 9H). **<sup>13</sup>C NMR** (100 MHz,  $\text{DMSO-}d_6$ )  $\delta$  169.0, 156.7, 147.4, 138.9, 138.1, 131.3, 131.0, 130.7, 127.6, 122.8, 120.9, 120.7, 119.8, 110.6, 100.7, 81.8, 75.8, 74.9, 42.4, 27.8, 20.3. **HRMS (ESI)**  $m/z$  calcd for  $\text{C}_{25}\text{H}_{29}\text{N}_3\text{O}_3$   $[\text{M}+\text{H}]^+$ : 420.2282, found: 420.2279.

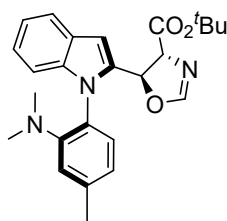

**(*S*,*4R*,*5R*)-*tert*-butyl 5-(1-(2-(dimethylamino)-4-methylphenyl)-1*H*-indol-2-yl)-4,5-dihydrooxazole-4-carboxylate (3ma)**

The desired product was purified by silica gel chromatography (PE/EA = 10:1) as pale yellow liquid (82.1 mg, 98% yield, 98% ee, 10:1 dr),  $[\alpha]_D^{20} = -149.0$  ( $c = 0.2$ ,  $\text{CH}_2\text{Cl}_2$ ). The ee was determined by HPLC on Chiralpak ID column, hexane: isopropanol = 95:5; flow rate = 1 mL/min; column temperature 25 °C; UV detection at 254 nm;  $t_{R1} = 11.35$  min (major),  $t_{R2} = 16.35$  min (minor),  $t_{R3} = 18.73$  min (minor),  $t_{R4} = 26.37$  min (minor). **<sup>1</sup>H NMR** (400 MHz,  $\text{DMSO-}d_6$ )  $\delta$  7.60 – 7.55 (m, 1H), 7.41 (d,  $J = 2.0$  Hz, 1H), 7.14 – 7.06 (m, 3H), 7.00 – 6.95 (m, 2H), 6.88 (dd,  $J = 8.0, 1.6$  Hz, 1H), 6.63 (s, 1H), 5.85 (d,  $J = 6.0$  Hz, 1H), 4.33 (dd,  $J = 6.0, 2.0$  Hz, 1H), 2.35 (s, 3H), 2.30 (s, 6H), 1.27 (s, 9H). **<sup>13</sup>C NMR** (100 MHz,  $\text{DMSO-}d_6$ )  $\delta$  169.0, 156.7, 149.4, 139.5, 138.9, 138.3, 130.6, 127.6,

124.9, 122.8, 122.6, 120.9, 120.7, 120.3, 110.6, 100.6, 81.8, 75.8, 74.8, 42.1, 27.8, 21.7. **HRMS**

**(ESI)** m/z calcd for C<sub>25</sub>H<sub>29</sub>N<sub>3</sub>O<sub>3</sub> [M+H]<sup>+</sup>: 420.2285, found: 420.2283.

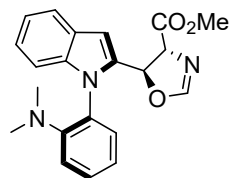

**(S<sub>a</sub>,4R<sub>c</sub>,5R<sub>e</sub>)-methyl 5-(1-(2-(dimethylamino)phenyl)-1H-indol-2-yl)-4,5-dihydrooxazole-4-carboxylate (3ab)**

The desired product was purified by silica gel chromatography (PE/EA = 8:1) as pale yellow liquid (70.4 mg, 97% yield, 97% ee, 14:1 dr), [ $\alpha$ ]<sub>D</sub><sup>20</sup> = -214.0 (c = 0.2, CH<sub>2</sub>Cl<sub>2</sub>). The ee was determined by HPLC on Chiralpak IC column, hexane: isopropanol = 90:10; flow rate = 1 mL/min; column temperature 25 °C; UV detection at 254 nm; t<sub>R1</sub> = 18.29 min (minor), t<sub>R2</sub> = 20.01 min (minor), t<sub>R3</sub> = 26.13 min (major), t<sub>R4</sub> = 28.48 min (minor). **<sup>1</sup>H NMR** (400 MHz, DMSO-*d*<sub>6</sub>) δ 7.61 (dd, *J* = 6.8, 1.6 Hz, 1H), 7.45 – 7.39 (m, 2H), 7.24 (dd, *J* = 7.6, 1.6 Hz, 1H), 7.17 – 7.12 (m, 2H), 7.11 – 7.03 (m, 2H), 7.00 (d, *J* = 7.6 Hz, 1H), 6.67 (s, 1H), 5.89 (d, *J* = 6.8 Hz, 1H), 4.50 (dd, *J* = 7.2, 2.4 Hz, 1H), 3.46 (s, 3H), 2.33 (s, 6H). **<sup>13</sup>C NMR** (100 MHz, DMSO-*d*<sub>6</sub>) δ 170.4, 156.8, 149.7, 138.6, 138.2, 131.1, 130.0, 127.6, 127.2, 123.0, 121.7, 121.0, 120.8, 119.5, 110.6, 100.7, 76.1, 73.7, 52.7, 42.1.

**HRMS (ESI)** m/z calcd for C<sub>21</sub>H<sub>21</sub>N<sub>3</sub>O<sub>3</sub> [M+H]<sup>+</sup>: 364.1656, found: 364.1655.

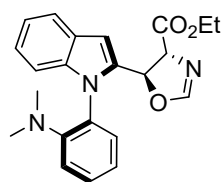

**(S<sub>a</sub>,4R<sub>c</sub>,5R<sub>e</sub>)-ethyl 5-(1-(2-(dimethylamino)phenyl)-1H-indol-2-yl)-4,5-dihydrooxazole-4-carboxylate (3ac)**

The desired product was purified by silica gel chromatography (PE/EA = 8:1) as pale yellow liquid (66.3 mg, 88% yield, 97% ee, 9:1 dr), [ $\alpha$ ]<sub>D</sub><sup>20</sup> = -140.0 (c = 0.2, CH<sub>2</sub>Cl<sub>2</sub>). The ee was determined by HPLC on Chiralpak AD-H column, hexane: isopropanol = 90:10; flow rate = 1 mL/min; column temperature 25 °C; UV detection at 254 nm; t<sub>R1</sub> = 8.60 min (minor), t<sub>R2</sub> = 11.30 min (major), t<sub>R3</sub> = 16.46 min (minor). **<sup>1</sup>H NMR** (400 MHz, DMSO-*d*<sub>6</sub>) δ 7.64 – 7.57 (m, 1H), 7.42 (d, *J* = 2.0 Hz, 1H), 7.23 (dd, *J* = 8.0, 1.6 Hz, 1H), 7.19 – 7.10 (m, 3H), 7.10 – 6.97 (m, 3H), 6.67 (d, *J* = 1.2 Hz, 1H),

5.89 (d,  $J = 6.8$  Hz, 1H), 4.46 (dd,  $J = 6.4, 2.0$  Hz, 1H), 3.99 – 3.79 (m, 2H), 2.32 (s, 6H), 1.09 (t,  $J = 7.2$  Hz, 3H). **<sup>13</sup>C NMR** (100 MHz, DMSO- $d_6$ )  $\delta$  169.9, 156.8, 149.7, 138.6, 138.2, 131.0, 130.1, 127.6, 127.2, 123.0, 121.7, 121.0, 120.8, 119.5, 110.6, 100.7, 76.0, 73.8, 61.7, 42.1, 14.3. **HRMS (ESI)**  $m/z$  calcd for C<sub>22</sub>H<sub>23</sub>N<sub>3</sub>O<sub>3</sub> [M+H]<sup>+</sup>: 378.1812, found: 378.1805.

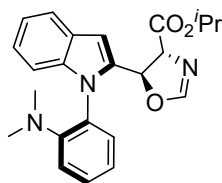

**(*S<sub>a</sub>,4R<sub>c</sub>,5R<sub>e</sub>*)-isopropyl 5-(1-(2-(dimethylamino)phenyl)-1*H*-indol-2-yl)-4,5-dihydrooxazole-4-carboxylate (3ad)**

The desired product was purified by silica gel chromatography (PE/EA = 10:1) as pale yellow liquid (73.5 mg, 94% yield, 99% ee, 6:1 dr),  $[\alpha]_D^{20} = -117.0$  ( $c = 0.2$ , CH<sub>2</sub>Cl<sub>2</sub>). The ee was determined by HPLC on Chiralpak AD-H column, hexane: isopropanol = 90:10; flow rate = 1 mL/min; column temperature 25 °C; UV detection at 254 nm;  $t_{R1} = 6.75$  min (minor),  $t_{R2} = 9.28$  min (major),  $t_{R3} = 12.07$  min (minor). **<sup>1</sup>H NMR** (400 MHz, DMSO- $d_6$ )  $\delta$  7.62 – 7.57 (m, 1H), 7.44 – 7.37 (m, 2H), 7.22 (dd,  $J = 8.0, 1.6$  Hz, 1H), 7.17 – 7.08 (m, 3H), 7.05 (td,  $J = 7.6, 1.6$  Hz, 1H), 6.99 (dd,  $J = 8.0, 1.2$  Hz, 1H), 6.68 (s, 1H), 5.88 (d,  $J = 6.4$  Hz, 1H), 4.69 (h,  $J = 6.4$  Hz, 1H), 4.46 (dd,  $J = 6.4, 2.0$  Hz, 1H), 2.33 (s, 6H), 1.08 (dd,  $J = 6.4, 1.6$  Hz, 6H). **<sup>13</sup>C NMR** (100 MHz, DMSO- $d_6$ )  $\delta$  169.3, 156.7, 149.7, 138.6, 138.1, 130.9, 130.1, 127.6, 127.2, 123.0, 121.7, 121.0, 120.8, 119.6, 110.7, 100.9, 75.7, 74.0, 69.4, 42.0, 21.8, 21.7. **HRMS (ESI)**  $m/z$  calcd for C<sub>23</sub>H<sub>25</sub>N<sub>3</sub>O<sub>3</sub> [M+H]<sup>+</sup>: 392.1969, found: 392.1966.

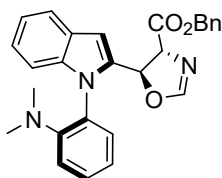

**(*S<sub>a</sub>,4R<sub>c</sub>,5R<sub>e</sub>*)-benzyl 5-(1-(2-(dimethylamino)phenyl)-1*H*-indol-2-yl)-4,5-dihydrooxazole-4-carboxylate (3ae)**

The desired product was purified by silica gel chromatography (PE/EA = 10:1) as pale yellow liquid (79.9 mg, 91% yield, 98% ee, 18:1 dr),  $[\alpha]_D^{20} = -195.0$  ( $c = 0.2$ , CH<sub>2</sub>Cl<sub>2</sub>). The ee was determined

by HPLC on Chiralpak AD-H column, hexane: isopropanol = 95:5; flow rate = 1 mL/min; column temperature 25 °C; UV detection at 254 nm;  $t_{R1}$  = 19.80 min (minor),  $t_{R2}$  = 37.06 min (minor),  $t_{R3}$  = 41.93 min (minor),  $t_{R4}$  = 46.23 min (major). **<sup>1</sup>H NMR** (400 MHz, DMSO-*d*<sub>6</sub>) δ 7.63 – 7.58 (m, 1H), 7.42 (d, *J* = 2.0 Hz, 1H), 7.41 – 7.33 (m, 4H), 7.31 – 7.26 (m, 2H), 7.20 (dd, *J* = 7.6, 1.6 Hz, 1H), 7.15 – 7.07 (m, 3H), 7.02 – 6.96 (m, 2H), 6.70 (s, 1H), 5.92 (d, *J* = 6.4 Hz, 1H), 5.02 (d, *J* = 12.4 Hz, 1H), 4.87 (d, *J* = 12.4 Hz, 1H), 4.61 (dd, *J* = 6.8, 2.0 Hz, 1H), 2.31 (s, 6H). **<sup>13</sup>C NMR** (100 MHz, DMSO-*d*<sub>6</sub>) δ 169.7, 156.9, 149.7, 138.4, 138.2, 135.8, 131.0, 130.1, 128.9, 128.7, 128.5, 127.5, 127.1, 123.0, 121.6, 121.1, 120.8, 119.5, 110.7, 101.0, 75.9, 73.7, 67.0, 42.0. **HRMS (ESI)** *m/z* calcd for C<sub>27</sub>H<sub>25</sub>N<sub>3</sub>O<sub>3</sub> [M+H]<sup>+</sup>: 440.1969, found: 440.1960.

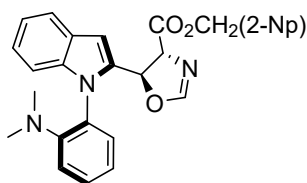

**(*S*,*4R*,*5R*)-naphthalen-2-ylmethyl 5-(1-(2-(dimethylamino)phenyl)-1*H*-indol-2-yl)-4,5-dihydrooxazole-4-carboxylate (3af)**

The desired product was purified by silica gel chromatography (PE/EA = 10:1) as pale yellow liquid (90.9 mg, 93% yield, 98% ee, 12:1 dr),  $[\alpha]_D^{20}$  = -211.0 (*c* = 0.2, CH<sub>2</sub>Cl<sub>2</sub>). The ee was determined by HPLC on Chiralpak IA column, hexane: isopropanol = 95:5; flow rate = 1 mL/min; column temperature 25 °C; UV detection at 254 nm;  $t_{R1}$  = 26.26 min (minor),  $t_{R2}$  = 37.00 min (minor),  $t_{R3}$  = 42.25 min (minor),  $t_{R4}$  = 44.54 min (major). **<sup>1</sup>H NMR** (400 MHz, DMSO-*d*<sub>6</sub>) δ 7.95 – 7.84 (m, 4H), 7.61 (dd, *J* = 7.6, 1.2 Hz, 1H), 7.56 – 7.51 (m, 2H), 7.44 (d, *J* = 2.0 Hz, 1H), 7.41 (dd, *J* = 8.8, 2.0 Hz, 1H), 7.37 – 7.31 (m, 1H), 7.19 (dd, *J* = 7.6, 1.6 Hz, 1H), 7.14 – 7.07 (m, 3H), 7.00 – 6.90 (m, 2H), 6.72 (s, 1H), 5.94 (d, *J* = 6.8 Hz, 1H), 5.19 (d, *J* = 12.4 Hz, 1H), 5.05 (d, *J* = 12.4 Hz, 1H), 4.67 (dd, *J* = 6.8, 2.0 Hz, 1H), 2.30 (s, 6H). **<sup>13</sup>C NMR** (100 MHz, DMSO-*d*<sub>6</sub>) δ 169.8, 156.9, 149.7, 138.3, 138.2, 133.3, 133.1, 131.0, 130.1, 128.6, 128.3, 128.1, 127.6, 127.5, 126.9, 126.9, 126.4, 123.0, 121.6, 121.1, 120.8, 119.5, 110.7, 101.0, 75.9, 73.7, 67.2, 42.0. **HRMS (ESI)** *m/z* calcd for C<sub>31</sub>H<sub>27</sub>N<sub>3</sub>O<sub>3</sub> [M+H]<sup>+</sup>: 490.2125, found: 490.2133.

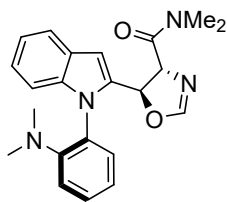

**(*S<sub>a</sub>*,4*R<sub>c</sub>*,5*R<sub>e</sub>*)-5-(1-(2-(dimethylamino)phenyl)-1*H*-indol-2-yl)-*N,N*-dimethyl-4,5-dihydrooxazole-4-carboxamide (5aa)**

The desired product was purified by silica gel chromatography (PE/EA = 5:1) as pale yellow liquid (71.4 mg, 95% yield, 98% ee, 9:1 dr),  $[\alpha]_D^{20} = -158.0$  ( $c = 0.2$ ,  $\text{CH}_2\text{Cl}_2$ ). The ee was determined by HPLC on Chiralpak IC column, hexane: isopropanol = 85:15; flow rate = 1 mL/min; column temperature 25 °C; UV detection at 254 nm;  $t_{R1} = 17.84$  min (minor),  $t_{R2} = 23.02$  min (major),  $t_{R3} = 39.74$  min (minor),  $t_{R4} = 50.73$  min (minor). **<sup>1</sup>H NMR** (400 MHz,  $\text{DMSO-}d_6$ )  $\delta$  7.61 – 7.58 (m, 1H), 7.36 (t,  $J = 8.0$  Hz, 1H), 7.29 (t,  $J = 1.6$  Hz, 1H), 7.25 (dt,  $J = 8.0, 1.6$  Hz, 1H), 7.13 – 7.07 (m, 3H), 7.04 – 6.98 (m, 2H), 6.65 (s, 1H), 6.24 (d,  $J = 6.0$  Hz, 1H), 4.72 (dd,  $J = 6.4, 2.0$  Hz, 1H), 2.89 (s, 3H), 2.63 (s, 3H), 2.35 (s, 6H). **<sup>13</sup>C NMR** (100 MHz,  $\text{DMSO-}d_6$ )  $\delta$  167.6, 155.3, 149.9, 140.1, 138.3, 130.8, 129.7, 127.7, 127.5, 122.6, 121.2, 120.8, 120.6, 119.7, 110.4, 100.2, 75.8, 71.8, 42.1, 37.0, 35.6. **HRMS (ESI)**  $m/z$  calcd for  $\text{C}_{22}\text{H}_{24}\text{N}_4\text{O}_2$   $[\text{M}+\text{H}]^+$ : 377.1972, found: 377.1966.

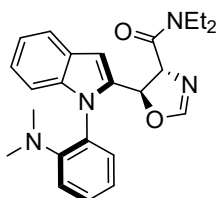

**(*S<sub>a</sub>*,4*R<sub>c</sub>*,5*R<sub>e</sub>*)-5-(1-(2-(dimethylamino)phenyl)-1*H*-indol-2-yl)-*N,N*-diethyl-4,5-dihydrooxazole-4-carboxamide (5ab)**

The desired product was purified by silica gel chromatography (PE/EA = 5:1) as pale yellow liquid (76.8 mg, 95% yield, 98% ee, 10:1 dr),  $[\alpha]_D^{20} = -118.0$  ( $c = 0.2$ ,  $\text{CH}_2\text{Cl}_2$ ). The ee was determined by HPLC on Chiralpak ID column, hexane: isopropanol = 92:8; flow rate = 1 mL/min; column temperature 25 °C; UV detection at 254 nm;  $t_{R1} = 18.49$  min (major),  $t_{R2} = 26.32$  min (minor). **<sup>1</sup>H NMR** (400 MHz,  $\text{DMSO-}d_6$ )  $\delta$  7.59 (dd,  $J = 7.2, 2.0$  Hz, 1H), 7.38 – 7.32 (m, 1H), 7.28 (d,  $J = 2.0$  Hz, 1H), 7.23 (dd,  $J = 8.0, 1.6$  Hz, 1H), 7.13 – 7.05 (m, 3H), 7.00 (td,  $J = 7.6, 1.2$  Hz, 2H), 6.63 (s, 1H), 6.23 (d,  $J = 5.6$  Hz, 1H), 4.69 (dd,  $J = 5.6, 2.0$  Hz, 1H), 3.35 – 3.28 (m, 1H), 3.28 – 3.18 (m, 1H), 3.18 – 3.08 (m, 1H), 3.06 – 2.95 (m, 1H), 2.35 (s, 6H), 1.03 (t,  $J = 7.2$  Hz, 3H), 0.89 (t,  $J = 7.2$

Hz, 3H). **<sup>13</sup>C NMR** (100 MHz, DMSO-*d*<sub>6</sub>) δ 167.0, 155.3, 149.8, 140.0, 138.3, 130.8, 129.9, 127.7, 127.5, 122.7, 121.5, 120.8, 120.6, 119.7, 110.5, 100.4, 75.7, 72.0, 42.1, 41.8, 40.5, 14.7, 13.3.

**HRMS (ESI)** *m/z* calcd for C<sub>24</sub>H<sub>28</sub>N<sub>4</sub>O<sub>2</sub> [M+H]<sup>+</sup>: 405.2285, found: 405.2282.

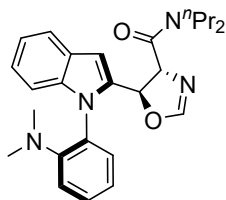

**(*S*<sub>a</sub>,4*R*<sub>c</sub>,5*R*<sub>c</sub>)-5-(1-(2-(dimethylamino)phenyl)-1*H*-indol-2-yl)-*N,N*-dipropyl-4,5-dihydrooxazole-4-carboxamide (5ac)**

The desired product was purified by silica gel chromatography (PE/EA = 5:1) as pale yellow liquid (80.2 mg, 93% yield, 99% ee, 13:1 dr), [α]<sup>20</sup><sub>D</sub> = -164.0 (c = 0.2, CH<sub>2</sub>Cl<sub>2</sub>). The ee was determined by HPLC on Chiralpak ID column, hexane: isopropanol = 90:10; flow rate = 1 mL/min; column temperature 25 °C; UV detection at 254 nm; t<sub>R1</sub> = 9.96 min (major), t<sub>R2</sub> = 13.07 min (minor), t<sub>R3</sub> = 23.18 min (minor), t<sub>R4</sub> = 25.19 min (minor). **<sup>1</sup>H NMR** (400 MHz, DMSO-*d*<sub>6</sub>) δ 7.59 (dd, *J* = 6.4, 1.2 Hz, 1H), 7.39 – 7.32(m, 1H), 7.29 (d, *J* = 1.6 Hz, 1H), 7.23 (dd, *J* = 7.6, 1.6 Hz, 1H), 7.14 – 7.06 (m, 3H), 7.03 – 6.96 (m, 2H), 6.64 (s, 1H), 6.21 (d, *J* = 5.6 Hz, 1H), 4.72 (dd, *J* = 5.6, 2.0 Hz, 1H), 3.31 – 3.21 (m, 1H), 3.16 – 3.06 (m, 1H), 3.00 (td, *J* = 7.2, 2.8 Hz, 2H), 2.34 (s, 6H), 1.59 – 1.47 (m, 1H), 1.45 – 1.36 (m, 1H), 1.35 – 1.27 (m, 2H), 0.76 (q, *J* = 7.6 Hz, 6H). **<sup>13</sup>C NMR** (100 MHz, DMSO-*d*<sub>6</sub>) δ 167.5, 155.4, 149.8, 139.8, 138.2, 130.7, 129.9, 127.7, 127.4, 122.7, 121.5, 120.8, 120.6, 119.7, 110.6, 100.5, 75.7, 72.0, 49.3, 47.9, 42.1, 22.3, 20.8, 11.8, 11.5. **HRMS (ESI)** *m/z* calcd for C<sub>26</sub>H<sub>32</sub>N<sub>4</sub>O<sub>2</sub> [M+H]<sup>+</sup>: 433.2598, found: 432.2599.

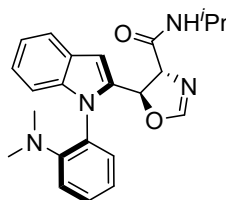

**(*S*<sub>a</sub>,4*R*<sub>c</sub>,5*R*<sub>c</sub>)-5-(1-(2-(dimethylamino)phenyl)-1*H*-indol-2-yl)-*N*-isopropyl-4,5-dihydrooxazole-4-carboxamide (5ad)**

The desired product was purified by silica gel chromatography (PE/EA = 5:1) as pale yellow liquid (67.1 mg, 86% yield, 52% ee, 10:1 dr), [α]<sup>20</sup><sub>D</sub> = -190.0 (c = 0.2, CH<sub>2</sub>Cl<sub>2</sub>). The ee was determined

by HPLC on Chiralpak IA column, hexane: isopropanol = 97:3; flow rate = 1 mL/min; column temperature 25 °C; UV detection at 254 nm;  $t_{R1}$  = 19.16 min (major),  $t_{R2}$  = 29.58 min (minor). **<sup>1</sup>H NMR** (400 MHz, DMSO- $d_6$ )  $\delta$  7.78 (d,  $J$  = 7.2 Hz, 1H), 7.61 (dd,  $J$  = 6.4, 1.6 Hz, 1H), 7.42 – 7.36 (m, 1H), 7.30 (d,  $J$  = 2.0 Hz, 1H), 7.15 – 7.08 (m, 4H), 7.01 (td,  $J$  = 7.2, 1.2 Hz, 1H), 6.97 – 6.92 (m, 1H), 6.64 (s, 1H), 5.72 (d,  $J$  = 6.8 Hz, 1H), 4.45 (dd,  $J$  = 6.8, 2.4 Hz, 1H), 3.62 (h,  $J$  = 6.4 Hz, 1H), 2.32 (s, 6H), 0.98 (dd,  $J$  = 6.8, 4.8 Hz, 6H). **<sup>13</sup>C NMR** (100 MHz, DMSO- $d_6$ )  $\delta$  168.1, 155.6, 149.8, 139.4, 137.8, 130.9, 130.0, 127.6, 127.1, 122.8, 121.4, 121.0, 120.7, 119.5, 110.9, 100.8, 75.4, 74.9, 42.0, 41.2, 22.6, 22.5. **HRMS (ESI)**  $m/z$  calcd for  $C_{23}H_{26}N_4O_2$  [M+H]<sup>+</sup>: 391.2129, found: 391.2122.

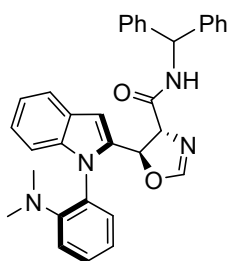

**(*S<sub>a</sub>*,4*R<sub>c</sub>*,5*R<sub>c</sub>*)-*N*-benzhydryl-5-(1-(2-(dimethylamino)phenyl)-1*H*-indol-2-yl)-4,5-dihydrooxazole-4-carboxamide (**5ae**)**

The desired product was purified by silica gel chromatography (PE/EA = 5:1) as pale yellow liquid (92.5 mg, 90% yield, 85% ee, 2:1 dr),  $[\alpha]_D^{20} = -172.0$  ( $c = 0.2$ ,  $CH_2Cl_2$ ). The ee was determined by HPLC on Chiralpak AD-H column, hexane: isopropanol = 95:5; flow rate = 1 mL/min; column temperature 25 °C; UV detection at 254 nm;  $t_{R1}$  = 32.00 min (minor),  $t_{R2}$  = 40.74 min (minor),  $t_{R3}$  = 50.77 min (major). **<sup>1</sup>H NMR** (400 MHz, DMSO- $d_6$ )  $\delta$  8.96 (d,  $J$  = 8.4 Hz, 1H), 7.64 – 7.60 (m, 1H), 7.37 – 7.28 (m, 7H), 7.27 – 7.20 (m, 5H), 7.12 – 7.09 (m, 2H), 7.08 (d,  $J$  = 1.2 Hz, 1H), 6.99 (dd,  $J$  = 7.6, 1.6 Hz, 1H), 6.94 – 6.90 (m, 1H), 6.68 (s, 1H), 6.65 (dd,  $J$  = 7.6, 1.6 Hz, 1H), 5.98 (d,  $J$  = 8.4 Hz, 1H), 5.75 (d,  $J$  = 6.8 Hz, 1H), 4.79 (dd,  $J$  = 6.4, 2.0 Hz, 1H), 2.32 (s, 6H). **<sup>13</sup>C NMR** (100 MHz, DMSO- $d_6$ )  $\delta$  168.4, 155.9, 149.7, 142.7, 142.3, 139.1, 137.8, 130.6, 129.9, 128.9, 128.8, 128.8, 127.9, 127.6, 127.5, 126.9, 122.9, 121.2, 121.0, 119.3, 111.0, 101.1, 75.2, 74.8, 56.7, 42.0. **HRMS (ESI)**  $m/z$  calcd for  $C_{33}H_{30}N_4O_2$  [M+H]<sup>+</sup>: 515.2442, found: 515.2440.

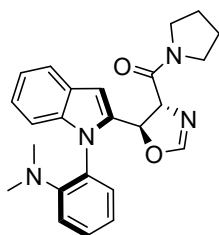

**(*S<sub>a</sub>*,4*R<sub>c</sub>*,5*R<sub>e</sub>*)- 5-(1-(2-(dimethylamino)phenyl)-1*H*-indol-2-yl)-4,5-dihydrooxazol-4-yl(pyrrolidin-1-yl)methanone (5af)**

The desired product was purified by silica gel chromatography (PE/EA = 5:1) as pale yellow liquid (76.4 mg, 95% yield, 97% ee, 4:1 dr),  $[\alpha]^{20}_{\text{D}} = -161.0$  ( $c = 0.2$ ,  $\text{CH}_2\text{Cl}_2$ ). The ee was determined by HPLC on Chiralpak IA column, hexane: isopropanol = 90:10; flow rate = 1 mL/min; column temperature 25 °C; UV detection at 254 nm;  $t_{\text{R}1} = 13.42$  min (major),  $t_{\text{R}2} = 19.46$  min (minor),  $t_{\text{R}3} = 23.33$  min (minor),  $t_{\text{R}4} = 37.52$  min (minor). **<sup>1</sup>H NMR** (400 MHz,  $\text{DMSO-}d_6$ )  $\delta$  7.59 (dd,  $J = 7.6$ , 2.0 Hz, 1H), 7.36 – 7.32 (m, 1H), 7.30 (d,  $J = 2.4$  Hz, 1H), 7.27 (dd,  $J = 7.6$ , 1.6 Hz, 1H), 7.17 – 7.13 (m, 1H), 7.12 – 7.08 (m, 2H), 7.05 – 7.01 (m, 2H), 6.62 (s, 1H), 6.21 (d,  $J = 6.4$  Hz, 1H), 4.48 (dd,  $J = 6.4$ , 2.0 Hz, 1H), 3.49 – 3.39 (m, 1H), 3.21 – 3.12 (m, 1H), 3.10 – 2.96 (m, 2H), 2.35 (s, 6H), 1.83 – 1.63 (m, 4H). **<sup>13</sup>C NMR** (100 MHz,  $\text{DMSO-}d_6$ )  $\delta$  165.8, 155.4, 149.9, 140.2, 138.3, 130.6, 129.7, 127.7, 127.5, 122.6, 121.3, 120.8, 120.6, 119.8, 110.4, 99.9, 75.6, 73.2, 46.1, 45.9, 42.1, 25.9, 24.3. **HRMS (ESI)**  $m/z$  calcd for  $\text{C}_{24}\text{H}_{26}\text{N}_4\text{O}_2$   $[\text{M}+\text{H}]^+$ : 403.2129, found: 403.2127.

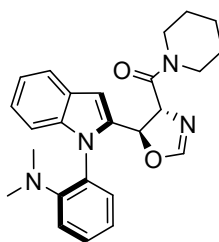

**(*S<sub>a</sub>*,4*R<sub>c</sub>*,5*R<sub>e</sub>*)- 5-(1-(2-(dimethylamino)phenyl)-1*H*-indol-2-yl)-4,5-dihydrooxazol-4-yl(piperidin-1-yl)methanone (5ag)**

The desired product was purified by silica gel chromatography (PE/EA = 5:1) as pale yellow liquid (79.0 mg, 95% yield, 98% ee, 6:1 dr),  $[\alpha]^{20}_{\text{D}} = -175.0$  ( $c = 0.2$ ,  $\text{CH}_2\text{Cl}_2$ ). The ee was determined by HPLC on Chiralpak IA column, hexane: isopropanol = 90:10; flow rate = 1 mL/min; column temperature 25 °C; UV detection at 254 nm;  $t_{\text{R}1} = 9.85$  min (major),  $t_{\text{R}2} = 12.21$  min (minor),  $t_{\text{R}3} = 15.50$  min (minor),  $t_{\text{R}4} = 36.18$  min (minor). **<sup>1</sup>H NMR** (400 MHz,  $\text{DMSO-}d_6$ )  $\delta$  7.59 (dd,  $J = 6.4$ , 2.0 Hz, 1H), 7.39 – 7.33 (m, 1H), 7.26 (d,  $J = 2.0$  Hz, 1H), 7.24 – 7.20 (m, 1H), 7.12 – 7.07 (m,

3H), 7.03 – 6.97 (m, 2H), 6.65 (s, 1H), 6.30 (d,  $J = 6.0$  Hz, 1H), 4.77 (dd,  $J = 6.0, 2.4$  Hz, 1H), 3.44 – 3.38 (m, 1H), 3.36 – 3.22 (m, 2H), 3.21 – 3.12 (m, 1H), 2.35 (s, 6H), 1.54 – 1.48 (m, 2H), 1.44 – 1.38 (m, 2H), 1.36 – 1.27 (m, 2H).  **$^{13}\text{C}$  NMR** (100 MHz, DMSO- $d_6$ )  $\delta$  165.7, 155.1, 149.9, 140.0, 138.3, 130.8, 129.8, 127.7, 127.5, 122.6, 121.4, 120.8, 120.6, 119.7, 110.5, 100.4, 75.5, 71.8, 46.4, 43.0, 42.1, 26.3, 25.5, 24.4. **HRMS (ESI)**  $m/z$  calcd for  $\text{C}_{25}\text{H}_{28}\text{N}_4\text{O}_2$   $[\text{M}+\text{H}]^+$ : 417.2285, found: 417.2282.

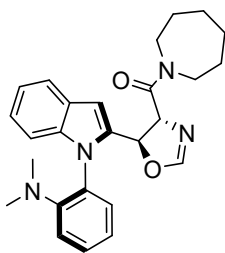

**( $S_a,4R_c,5R_c$ )- (azepan-1-yl) (5-(1-(2-(dimethylamino)phenyl)-1H-indol-2-yl)-4,5-dihydrooxazol-4-yl)methanone (5ah)**

The desired product was purified by silica gel chromatography (PE/EA = 5:1) as pale yellow liquid (78.3 mg, 91% yield, 98% ee, 8:1 dr),  $[\alpha]_D^{20} = -210.0$  ( $c = 0.2$ ,  $\text{CH}_2\text{Cl}_2$ ). The ee was determined by HPLC on Chiralpak ID column, hexane: isopropanol = 90:10; flow rate = 1 mL/min; column temperature 25 °C; UV detection at 254 nm;  $t_{R1} = 16.09$  min (major),  $t_{R2} = 29.62$  min (minor).  **$^1\text{H}$  NMR** (400 MHz, DMSO- $d_6$ )  $\delta$  7.59 (d,  $J = 7.6$  Hz, 1H), 7.37 – 7.32 (m, 1H), 7.29 (t,  $J = 1.6$  Hz, 1H), 7.23 (dd,  $J = 7.6, 1.6$  Hz, 1H), 7.13 – 7.07 (m, 3H), 7.01 (t,  $J = 7.2$  Hz, 2H), 6.62 (s, 1H), 6.27 (d,  $J = 5.6$  Hz, 1H), 4.68 (dd,  $J = 6.0, 2.0$  Hz, 1H), 3.45 – 3.42 (m, 1H), 3.38 – 3.33 (m, 1H), 3.28 – 3.20 (m, 1H), 3.12 – 3.05 (m, 1H), 2.34 (s, 6H), 1.53 – 1.40 (m, 6H), 1.38 – 1.32 (m, 2H).  **$^{13}\text{C}$  NMR** (100 MHz, DMSO- $d_6$ )  $\delta$  167.3, 155.3, 149.8, 140.1, 138.3, 130.7, 129.8, 127.7, 127.5, 122.6, 121.4, 120.8, 120.6, 119.7, 110.4, 100.2, 75.8, 72.0, 47.3, 45.9, 42.1, 28.8, 27.2, 26.4. **HRMS (ESI)**  $m/z$  calcd for  $\text{C}_{26}\text{H}_{30}\text{N}_4\text{O}_2$   $[\text{M}+\text{H}]^+$ : 431.2442, found: 431.2439.

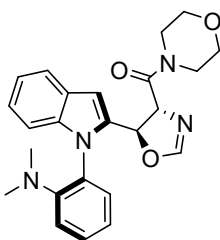

**( $S_a,4R_c,5R_c$ )- (5-(1-(2-(dimethylamino)phenyl)-1H-indol-2-yl)-4,5-dihydrooxazol-4-**

**yl)(morpholino)methanone (5ai)**

The desired product was purified by silica gel chromatography (PE/EA = 3:1) as white solid (80.2 mg, 96% yield, 99% ee, 10:1 dr), m.p. 73.0-88.4 °C;  $[\alpha]_D^{20} = -232.0$  (c = 0.2, CH<sub>2</sub>Cl<sub>2</sub>). The ee was determined by HPLC on Chiralpak AS-H column, hexane: isopropanol = 85:15; flow rate = 1 mL/min; column temperature 25 °C; UV detection at 254 nm;  $t_{R1} = 8.76$  min (major),  $t_{R2} = 11.26$  min (minor),  $t_{R3} = 13.18$  min (minor),  $t_{R4} = 18.47$  min (minor). **<sup>1</sup>H NMR** δ 7.62 – 7.57 (m, 1H), 7.41 – 7.35 (m, 1H), 7.30 (d, *J* = 2.0 Hz, 1H), 7.25 (dd, *J* = 7.6, 1.6 Hz, 1H), 7.13 – 7.09 (m, 2H), 7.08 (d, *J* = 1.6 Hz, 1H), 7.07 – 7.03 (m, 1H), 7.01 (dd, *J* = 7.2, 2.0 Hz, 1H), 6.65 (s, 1H), 6.31 (d, *J* = 5.6 Hz, 1H), 4.80 (dd, *J* = 6.0, 2.4 Hz, 1H), 3.57 – 3.42 (m, 6H), 3.35 – 3.29 (m, 1H), 3.22 – 3.14 (m, 1H), 2.35 (s, 6H). **<sup>13</sup>C NMR** (100 MHz, DMSO-*d*<sub>6</sub>) δ 166.2, 155.3, 150.0, 139.9, 138.3, 130.9, 129.8, 127.7, 127.5, 122.7, 121.4, 120.8, 120.6, 119.8, 110.4, 100.3, 75.4, 71.6, 66.5, 66.3, 46.0, 42.4, 42.1. **HRMS (ESI)** *m/z* calcd for C<sub>24</sub>H<sub>26</sub>N<sub>4</sub>O<sub>3</sub> [M+H]<sup>+</sup>: 419.2078, found: 419.2081.

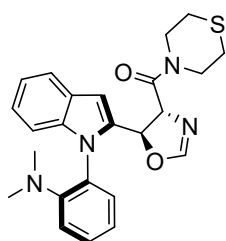

**(*S<sub>a</sub>*,4*R<sub>c</sub>*,5*R<sub>c</sub>*)- (5-(1-(2-(dimethylamino)phenyl)-1*H*-indol-2-yl)-4,5-dihydrooxazol-4-yl)(thiomorpholino)methanone (5aj)**

The desired product was purified by silica gel chromatography (PE/EA = 5:1) as white solid (79.0 mg, 91% yield, 99% ee, 11:1 dr), m.p. 82.8-89.5 °C;  $[\alpha]_D^{20} = -263.0$  (c = 0.2, CH<sub>2</sub>Cl<sub>2</sub>). The ee was determined by HPLC on Chiralpak ID column, hexane: isopropanol = 90:10; flow rate = 1 mL/min; column temperature 25 °C; UV detection at 254 nm;  $t_{R1} = 15.87$  min (major),  $t_{R2} = 29.48$  min (minor),  $t_{R3} = 31.97$  min (minor),  $t_{R4} = 41.66$  min (minor). **<sup>1</sup>H NMR** (400 MHz, DMSO-*d*<sub>6</sub>) δ 7.70 – 7.66 (m, 1H), 7.51 – 7.45 (m, 1H), 7.41 – 7.35 (m, 2H), 7.23 – 7.16 (m, 3H), 7.16 – 7.08 (m, 2H), 6.72 (s, 1H), 6.41 (d, *J* = 5.6 Hz, 1H), 4.88 (dd, *J* = 6.0, 2.4 Hz, 1H), 3.89 – 3.81 (m, 1H), 3.78 – 3.70 (m, 1H), 3.69 – 3.62 (m, 1H), 3.58 – 3.50 (m, 1H), 2.70 – 2.52 (m, 4H), 2.44 (s, 6H). **<sup>13</sup>C NMR** (100 MHz, DMSO-*d*<sub>6</sub>) δ 166.2, 155.4, 150.0, 140.0, 138.3, 131.0, 130.0, 127.7, 127.5, 122.7, 121.3, 120.8, 120.6, 119.8, 110.4, 100.2, 75.5, 71.8, 48.2, 44.8, 42.1, 27.5, 26.8. **HRMS (ESI)** *m/z* calcd for C<sub>24</sub>H<sub>26</sub>N<sub>4</sub>O<sub>2</sub>S [M+H]<sup>+</sup>: 435.1849, found: 435.1841.

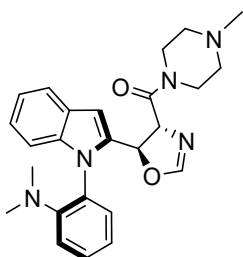

**(*S<sub>a</sub>*,4*R<sub>c</sub>*,5*R<sub>c</sub>*)- (5-(1-(2-(dimethylamino)phenyl)-1*H*-indol-2-yl)-4,5-dihydrooxazol-4-yl)(4-methylpiperazin-1-yl)methanone (5ak)**

The desired product was purified by silica gel chromatography (DCM/MeOH = 30:1) as white solid (83.6 mg, 97% yield, 95% ee, 7:1 dr), m.p. 76.9-83.3 °C;  $[\alpha]_D^{20} = -101.0$  ( $c = 0.2$ , CH<sub>2</sub>Cl<sub>2</sub>). The ee was determined by HPLC on Chiralpak ID column, hexane: isopropanol = 80:20; flow rate = 1 mL/min; column temperature 25 °C; UV detection at 254 nm;  $t_{R1} = 16.92$  min (minor),  $t_{R2} = 24.73$  min (minor),  $t_{R3} = 27.20$  min (major),  $t_{R4} = 35.10$  min (minor). **<sup>1</sup>H NMR** (400 MHz, DMSO-*d*<sub>6</sub>)  $\delta$  7.59 (dd,  $J = 6.8, 1.6$  Hz, 1H), 7.40 – 7.34 (m, 1H), 7.28 (d,  $J = 2.0$  Hz, 1H), 7.24 (dd,  $J = 7.6, 1.6$  Hz, 1H), 7.16 – 7.11 (m, 1H), 7.11 – 7.08 (m, 2H), 7.07 – 7.03 (m, 1H), 7.00 (d,  $J = 7.6$  Hz, 1H), 6.63 (s, 1H), 6.27 (d,  $J = 6.0$  Hz, 1H), 4.78 (dd,  $J = 6.0, 2.0$  Hz, 1H), 3.49 – 3.40 (m, 2H), 3.33 – 3.27 (m, 1H), 3.21 – 3.12 (m, 1H), 2.34 (s, 6H), 2.20 – 2.17 (m, 2H), 2.15 (s, 3H), 2.14 – 2.11 (m, 2H). **<sup>13</sup>C NMR** (100 MHz, DMSO-*d*<sub>6</sub>)  $\delta$  166.0, 155.3, 149.9, 139.9, 138.3, 130.8, 129.9, 127.6, 127.4, 122.7, 121.6, 120.8, 120.6, 119.8, 110.4, 100.3, 75.4, 71.6, 55.0, 54.4, 46.1, 45.3, 42.1, 41.9. **HRMS (ESI)**  $m/z$  calcd for C<sub>25</sub>H<sub>29</sub>N<sub>5</sub>O<sub>2</sub> [M+H]<sup>+</sup>: 432.2394, found: 432.2388.

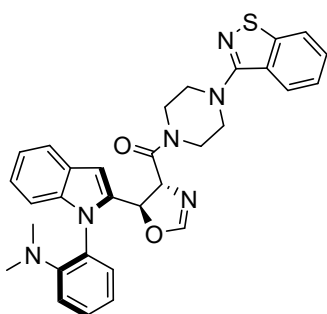

**(*S<sub>a</sub>*,4*R<sub>c</sub>*,5*R<sub>c</sub>*)- (4-(benzo[*d*]isothiazol-3-yl)piperazin-1-yl)(5-(1-(2-(dimethylamino)phenyl)-1*H*-indol-2-yl)-4,5-dihydrooxazol-4-yl)methanone (5al)**

The desired product was purified by silica gel chromatography (PE/EA = 2:1) as white solid (100.1 mg, 91% yield, 87% ee, >20:1 dr), m.p. 105.1-113.4 °C;  $[\alpha]_D^{20} = -159.0$  ( $c = 0.2$ , CH<sub>2</sub>Cl<sub>2</sub>). The ee

was determined by HPLC on Chiralpak OD-H column, hexane: isopropanol = 80:20; flow rate = 0.9 mL/min; column temperature 25 °C; UV detection at 254 nm;  $t_{R1}$  = 12.45 min (major),  $t_{R2}$  = 17.38 min (minor),  $t_{R3}$  = 20.74 min (minor),  $t_{R4}$  = 27.40 min (minor). **<sup>1</sup>H NMR** (400 MHz, DMSO-*d*<sub>6</sub>)  $\delta$  8.09 (d, *J* = 8.0 Hz, 1H), 8.06 (d, *J* = 8.0 Hz, 1H), 7.62 – 7.54 (m, 2H), 7.47 – 7.41 (m, 1H), 7.39 – 7.32 (m, 2H), 7.27 (dd, *J* = 7.6, 1.6 Hz, 1H), 7.15 – 7.08 (m, 3H), 7.04 – 6.99 (m, 2H), 6.66 (s, 1H), 6.33 (d, *J* = 5.6 Hz, 1H), 4.89 (dd, *J* = 5.6, 2.0 Hz, 1H), 3.74 – 3.64 (m, 2H), 3.54 – 3.48 (m, 2H), 3.44 – 3.38 (m, 2H), 3.38 – 3.35 (m, 1H), 3.34 – 3.27 (m, 1H), 2.36 (s, 6H). **<sup>13</sup>C NMR** (100 MHz, DMSO-*d*<sub>6</sub>)  $\delta$  166.3, 163.6, 155.4, 152.5, 150.0, 139.9, 138.3, 130.9, 129.8, 128.4, 127.7, 127.7, 127.5, 125.0, 124.6, 122.7, 121.6, 121.5, 120.8, 120.6, 119.8, 110.5, 100.3, 75.4, 71.8, 50.1, 49.7, 45.2, 42.1, 41.9. **HRMS (ESI)** *m/z* calcd for C<sub>31</sub>H<sub>30</sub>N<sub>6</sub>O<sub>2</sub>S [M+H]<sup>+</sup>: 551.2224, found: 551.2230.

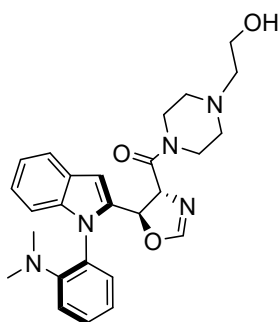

**(*S*<sub>a</sub>,4*R*<sub>c</sub>,5*R*<sub>c</sub>)- (5-(1-(2-(dimethylamino)phenyl)-1*H*-indol-2-yl)-4,5-dihydrooxazol-4-yl)(4-(2-hydroxyethyl)piperazin-1-yl)methanone (5am)**

The desired product was purified by silica gel chromatography (DCM/MeOH = 20:1) as white solid (84.8 mg, 92% yield, 81% ee, 20:1 dr), m.p. 113.7-121.0 °C;  $[\alpha]^{20}_D = -188.0$  (*c* = 0.2, CH<sub>2</sub>Cl<sub>2</sub>). The ee was determined by HPLC on Chiralpak OD-H column, hexane: isopropanol = 80:20; flow rate = 1 mL/min; column temperature 25 °C; UV detection at 254 nm;  $t_{R1}$  = 13.18 min (major),  $t_{R2}$  = 48.37 min (minor). **<sup>1</sup>H NMR** (400 MHz, DMSO-*d*<sub>6</sub>)  $\delta$  7.61 – 7.56 (m, 1H), 7.40 – 7.34 (m, 1H), 7.27 (d, *J* = 2.0 Hz, 1H), 7.23 (dd, *J* = 7.6, 1.6 Hz, 1H), 7.15 – 7.07 (m, 3H), 7.06 – 6.98 (m, 2H), 6.64 (s, 1H), 6.27 (d, *J* = 5.6 Hz, 1H), 4.78 (dd, *J* = 5.6, 2.0 Hz, 1H), 4.44 (s, 1H), 3.56 – 3.39 (m, 4H), 3.39 – 3.25 (m, 3H), 3.21 – 3.13 (m, 1H), 2.41 (t, *J* = 6.0 Hz, 2H), 2.35 (s, 6H), 2.32 – 2.17 (m, 2H). **<sup>13</sup>C NMR** (100 MHz, DMSO-*d*<sub>6</sub>)  $\delta$  165.9, 155.2, 149.9, 139.9, 138.3, 130.9, 129.8, 127.6, 127.4, 122.7, 121.5, 120.8, 120.6, 119.8, 110.5, 100.3, 75.4, 71.6, 60.4, 58.8, 53.5, 53.0, 45.3, 42.1, 41.9. **HRMS**

**(ESI)** m/z calcd for C<sub>26</sub>H<sub>31</sub>N<sub>5</sub>O<sub>3</sub> [M+H]<sup>+</sup>: 462.2500, found: 462.2495.

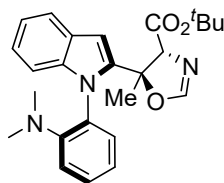

**(S<sub>a</sub>,4R<sub>c</sub>,5R<sub>c</sub>)-tert-butyl 5-(1-(2-(dimethylamino)phenyl)-1H-indol-2-yl)-5-methyl-4,5-dihydrooxazole-4-carboxylate (6aa)**

The desired product was purified by silica gel chromatography (PE/EA = 10:1) as pale yellow liquid (35.2 mg, 42% yield, 98% ee, >20:1 dr), [ $\alpha$ ]<sup>20</sup><sub>D</sub> = -220.0 (c = 0.2, CH<sub>2</sub>Cl<sub>2</sub>). The ee was determined by HPLC on Chiralpak IC column, hexane: isopropanol = 90:10; flow rate = 1 mL/min; column temperature 25 °C; UV detection at 254 nm; t<sub>R1</sub> = 23.61 min (minor), t<sub>R2</sub> = 28.35 min (major), t<sub>R3</sub> = 43.24 min (minor). **<sup>1</sup>H NMR** (400 MHz, DMSO-*d*<sub>6</sub>)  $\delta$  7.61 – 7.58 (m, 1H), 7.41 – 7.36 (m, 1H), 7.14 (dd, *J* = 7.6, 1.6 Hz, 1H), 7.11 – 7.06 (m, 3H), 6.94 (dd, *J* = 7.6, 1.2 Hz, 1H), 6.92 (d, *J* = 2.4 Hz, 1H), 6.76 (s, 1H), 6.73 (d, *J* = 7.6 Hz, 1H), 5.01 (d, *J* = 2.0 Hz, 1H), 2.34 (s, 6H), 1.56 (s, 3H), 1.37 (s, 9H). **<sup>13</sup>C NMR** (100 MHz, DMSO-*d*<sub>6</sub>)  $\delta$  168.3, 155.9, 149.8, 142.5, 140.3, 132.1, 130.1, 127.6, 126.7, 123.0, 120.9, 120.6, 120.4, 119.2, 111.2, 102.6, 83.9, 82.0, 75.8, 42.0, 28.1, 22.7.

**HRMS (ESI)** m/z calcd for C<sub>25</sub>H<sub>29</sub>N<sub>3</sub>O<sub>3</sub> [M+H]<sup>+</sup>: 420.2282, found: 420.2290.

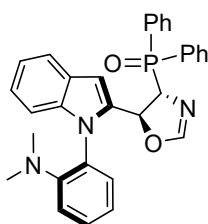

**(S<sub>a</sub>,4S<sub>c</sub>,5S<sub>c</sub>)-5-(1-(2-(dimethylamino)phenyl)-1H-indol-2-yl)-4,5-dihydrooxazol-4-yl)diphenylphosphine oxide (6ab)**

The desired product was purified by silica gel chromatography (PE/EA = 3:1) as white solid (92.9 mg, 92% yield, 87% ee, 3:1 dr), m.p. 92.2-101.3 °C; [ $\alpha$ ]<sup>20</sup><sub>D</sub> = -209.0 (c = 0.2, CH<sub>2</sub>Cl<sub>2</sub>). The ee was determined by HPLC on Chiralpak ID column, hexane: isopropanol = 80:20; flow rate = 1 mL/min; column temperature 25 °C; UV detection at 254 nm; t<sub>R1</sub> = 33.42 min (minor), t<sub>R2</sub> = 38.81 min (minor), t<sub>R3</sub> = 50.90 min (major), t<sub>R4</sub> = 66.74 min (minor). **<sup>1</sup>H NMR** (400 MHz, DMSO-*d*<sub>6</sub>)  $\delta$  7.96

– 7.80 (m, 4H), 7.65 – 7.48 (m, 7H), 7.40 – 7.34 (m, 1H), 7.22 – 7.19 (m, 1H), 7.16 – 7.03 (m, 4H), 6.97 (s, 1H), 6.81 – 6.77 (m, 1H), 6.06 (dd,  $J = 7.6, 1.6$  Hz, 1H), 5.73 (dd,  $J = 7.6, 2.0$  Hz, 1H), 5.51 (dd,  $J = 19.6, 8.0$  Hz, 1H), 2.32 (s, 6H).  **$^{13}\text{C}$  NMR** (100 MHz, DMSO- $d_6$ )  $\delta$  156.1, 156.0, 149.8, 137.6, 137.2 (d,  $J = 11.3$  Hz), 132.8, 132.6, 132.0, 132.0, 131.7, 131.6, 130.8, 129.9, 129.4, 129.3, 129.0, 128.9, 127.2, 126.1, 123.5, 121.4, 120.8, 120.7, 119.1, 111.7, 104.3, 72.2 (d,  $J = 4.7$  Hz), 70.8, 70.0, 41.9.  **$^{31}\text{P}$  NMR** (162 MHz, DMSO- $d_6$ )  $\delta$  31.27. **HRMS (ESI)**  $m/z$  calcd for  $\text{C}_{31}\text{H}_{28}\text{N}_3\text{O}_2\text{P}$   $[\text{M}+\text{H}]^+$ : 506.1992, found: 506.1987.

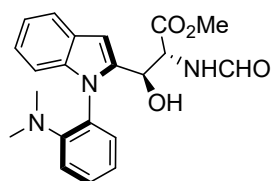

**( $S_a,2R_c,3R_e$ )-methyl 3-(1-(2-(dimethylamino)phenyl)-1H-indol-2-yl)-2-formamido-3-hydroxypropanoate (7ab)**

The desired product was purified by silica gel chromatography (PE/EA = 1:1) as colorless liquid (64.7 mg, 85% yield, 97% ee, >20:1 dr),  $[\alpha]_D^{20} = -234.0$  ( $c = 0.2, \text{CH}_2\text{Cl}_2$ ). The ee was determined by HPLC on Chiralpak OD-H column, hexane: isopropanol = 90:10; flow rate = 1 mL/min; column temperature 25 °C; UV detection at 254 nm;  $t_{R1} = 17.79$  min (minor),  $t_{R2} = 20.83$  min (minor),  $t_{R3} = 23.79$  min (minor),  $t_{R4} = 28.90$  min (major).  **$^1\text{H}$  NMR** (400 MHz, DMSO- $d_6$ )  $\delta$  8.26 (dd,  $J = 9.2, 2.0$  Hz, 1H), 7.88 (d,  $J = 1.6$  Hz, 1H), 7.58 – 7.54 (m, 1H), 7.46 – 7.41 (m, 1H), 7.20 (dd,  $J = 8.4, 1.6$  Hz, 1H), 7.14 (dd,  $J = 8.0, 2.0$  Hz, 1H), 7.10 – 7.03 (m, 3H), 6.96 – 6.91 (m, 1H), 6.64 (s, 1H), 6.04 (d,  $J = 5.2$  Hz, 1H), 5.35 (dd,  $J = 5.2, 2.4$  Hz, 1H), 4.28 (dd,  $J = 9.2, 2.4$  Hz, 1H), 3.54 (s, 3H), 2.34 (s, 6H).  **$^{13}\text{C}$  NMR** (100 MHz, DMSO- $d_6$ )  $\delta$  170.5, 161.6, 149.8, 141.6, 138.1, 131.1, 129.9, 127.8, 127.7, 122.1, 121.6, 120.5, 120.2, 119.4, 110.2, 101.9, 67.1, 55.0, 52.5, 42.2. **HRMS (ESI)**  $m/z$  calcd for  $\text{C}_{21}\text{H}_{23}\text{N}_3\text{O}_4$   $[\text{M}+\text{H}]^+$ : 382.1761, found: 382.1765.

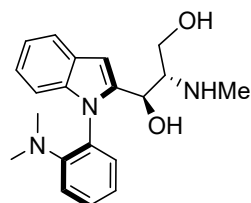

**( $S_a,1R_c,2S_e$ )-1-(1-(2-(dimethylamino)phenyl)-1H-indol-2-yl)-2-(methylamino)propane-1,3-**

### diol (**8ab**)

The desired product was purified by silica gel chromatography (DCM/MeOH = 20:1) as colorless liquid (59.6 mg, 88% yield, 96% ee, >20:1 dr),  $[\alpha]_D^{20} = -188.0$  (c = 0.2, CH<sub>2</sub>Cl<sub>2</sub>). The ee was determined by HPLC on Chiralpak OD-H column, hexane: isopropanol = 90:10; flow rate = 1 mL/min; column temperature 25 °C; UV detection at 254 nm;  $t_{R1} = 7.18$  min (major),  $t_{R2} = 9.19$  min (minor). **<sup>1</sup>H NMR** (400 MHz, DMSO-*d*<sub>6</sub>) δ 7.63 – 7.55 (m, 1H), 7.46 – 7.36 (m, 1H), 7.22 (dd, *J* = 7.6, 1.6 Hz, 1H), 7.17 (dd, *J* = 8.0, 1.2 Hz, 1H), 7.12 – 7.02 (m, 3H), 6.99 – 6.91 (m, 1H), 6.68 (s, 1H), 4.63 (d, *J* = 5.2 Hz, 1H), 4.38 (s, 1H), 3.65 – 3.35 (m, 2H), 3.32 (dd, *J* = 10.8, 5.2 Hz, 1H), 3.18 (dd, *J* = 10.8, 6.0 Hz, 1H), 2.54 – 2.51 (m, 1H), 2.33 (s, 6H), 2.15 (s, 3H). **<sup>13</sup>C NMR** (100 MHz, DMSO-*d*<sub>6</sub>) δ 149.9, 144.1, 137.6, 131.3, 129.6, 128.2, 128.1, 121.8, 121.3, 120.4, 120.2, 119.2, 110.5, 100.9, 65.5, 65.3, 60.8, 42.1, 35.3. **HRMS (ESI)** *m/z* calcd for C<sub>20</sub>H<sub>25</sub>N<sub>3</sub>O<sub>2</sub> [M+H]<sup>+</sup>: 340.2020, found: 340.2017.

## 8. Investigation on the enantiomerization barrier

The reaction was conducted at 10 mg/mL concentration in a sealed tube. The change in diastereomeric excess (*de*) value over time was determined by HPLC. The rotational barrier of **3ab** was obtained by the racemization kinetic calculation of diastereomers.

The configurational stability of the chiral axis in **3ab** was investigated by monitoring the *de* over time at 353.15 K. The decay of *de* followed first-order kinetics, and the **epimerization rate constant** ( $k_{\text{epi}}$ ) was determined from the slope of the plot of  $\ln(de_0/de_t)$  versus time. As the central chirality remains fixed, the rotation of the axis results in an epimerization process following first-order kinetics:

$$\ln \left( \frac{de_0}{de_t} \right) = k_{\text{epi}} \cdot t$$

The epimerization rate constant ( $k_{\text{epi}}$ ) was determined from the slope of the linear regression of  $\ln(de_0/de_t)$  versus time (s).

**Table S1. Investigation of the epimerization of 3ab**

| Time (s) | diastereomeric excess ( <i>de</i> ) | $\ln(de_0/de_t)$ |
|----------|-------------------------------------|------------------|
| 0        | 0.9720                              | 0                |
| 3600     | 0.9538                              | 0.018911         |
| 7200     | 0.9457                              | 0.027365         |
| 10800    | 0.9381                              | 0.035523         |
| 18000    | 0.9013                              | 0.075503         |
| 27000    | 0.8729                              | 0.107515         |
| 57600    | 0.7751                              | 0.226403         |
| 86400    | 0.6797                              | 0.357691         |

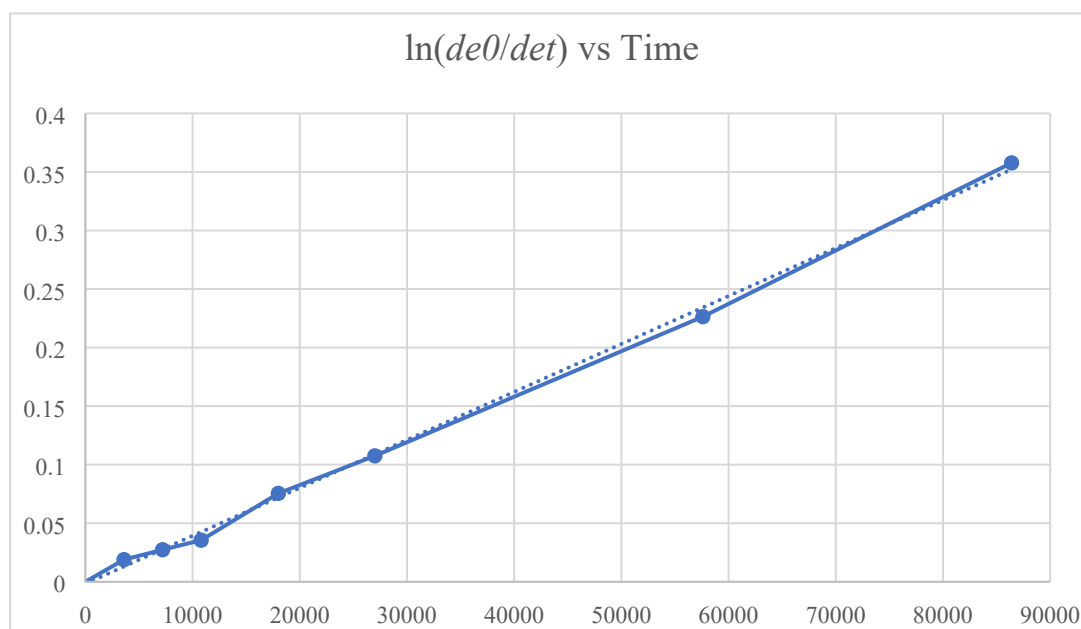

Assuming the diastereomers are energetically similar, the individual rotation rate constant of the axis ( $k_{rot}$ ) is given by:

$$k_{rot} = \frac{k_{epi}}{2} = 2.05 \times 10^{-6} \text{ s}^{-1}$$

The Gibbs free energy of activation for the axial rotation was calculated via the Eyring equation:

$$\Delta G^\ddagger = RT \ln \left( \frac{k_B T}{h k_{rot}} \right)$$

$$R: 8.31446 \text{ J mol}^{-1} \text{ K}^{-1}$$

$$k_B: 1.38065 \times 10^{-23} \text{ J K}^{-1}$$

$$h: 6.62607 \times 10^{-34} \text{ J s}$$

Using  $T = 353.15 \text{ K}$ , the rotation barrier  $\Delta G^\ddagger$  for **3ab** was determined to be  $30.0 \text{ kcal}\cdot\text{mol}^{-1}$ .

Based on the derived barrier, the parameters at  $298.15 \text{ K}$  ( $25^\circ\text{C}$ ) were predicted:

$$\text{Epimerization rate constant } k_{\text{epi},25^\circ\text{C}} = 1.31 \times 10^{-9} \text{ s}^{-1}$$

Half-life ( $t_{1/2}$ ): Approximately 16.8 years.

## 9. Crystallographic information

Crystal Structure of **7ak** The qualified crystals were obtained via slow evaporation of a solution of **7ak** in chloroform to n-hexane.

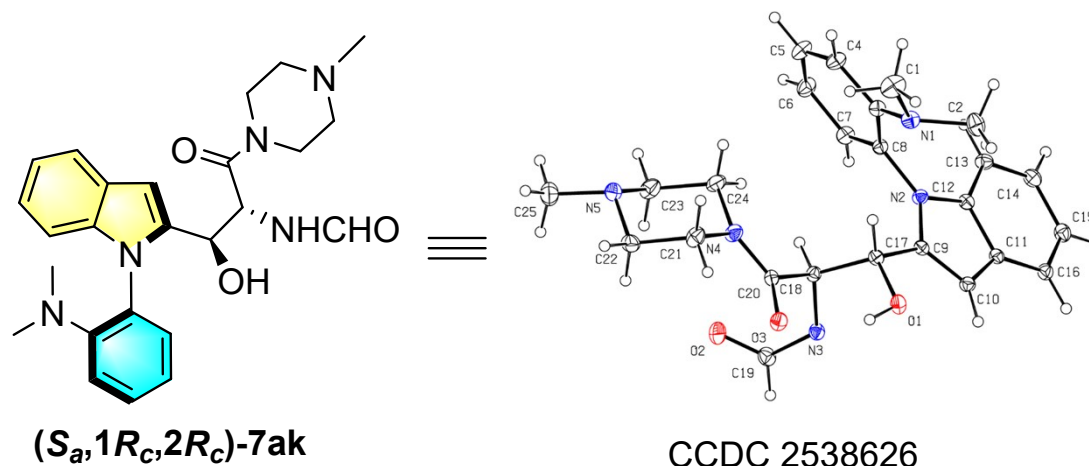

**Table S2 Crystal data and structure refinement for 260316\_CON\_paiqin\_LJY.**

|                     |                                                  |
|---------------------|--------------------------------------------------|
| Identification code | 260316_CON_paiqin_LJY                            |
| Empirical formula   | $\text{C}_{25}\text{H}_{30}\text{N}_5\text{O}_3$ |
| Formula weight      | 448.54                                           |
| Temperature/K       | 170.00                                           |
| Crystal system      | orthorhombic                                     |
| Space group         | $P2_12_12_1$                                     |
| $a/\text{\AA}$      | 7.9667(7)                                        |
| $b/\text{\AA}$      | 15.6585(13)                                      |
| $c/\text{\AA}$      | 18.3346(15)                                      |
| $\alpha/^\circ$     | 90                                               |

|                                                |                                                               |
|------------------------------------------------|---------------------------------------------------------------|
| $\beta/^\circ$                                 | 90                                                            |
| $\gamma/^\circ$                                | 90                                                            |
| Volume/ $\text{\AA}^3$                         | 2287.2(3)                                                     |
| Z                                              | 4                                                             |
| $\rho_{\text{calc}}/\text{g/cm}^3$             | 1.303                                                         |
| $\mu/\text{mm}^{-1}$                           | 0.469                                                         |
| F(000)                                         | 956.0                                                         |
| Crystal size/ $\text{mm}^3$                    | $0.29 \times 0.18 \times 0.06$                                |
| Radiation                                      | GaK $\alpha$ ( $\lambda = 1.34139$ )                          |
| 2 $\Theta$ range for data collection/ $^\circ$ | 6.458 to 121.328                                              |
| Index ranges                                   | $-10 \leq h \leq 10, -20 \leq k \leq 20, -23 \leq l \leq 23$  |
| Reflections collected                          | 70110                                                         |
| Independent reflections                        | 5247 [ $R_{\text{int}} = 0.0509, R_{\text{sigma}} = 0.0230$ ] |
| Data/restraints/parameters                     | 5247/0/302                                                    |
| Goodness-of-fit on $F^2$                       | 1.056                                                         |
| Final R indexes [ $I \geq 2\sigma(I)$ ]        | $R_1 = 0.0338, wR_2 = 0.0873$                                 |
| Final R indexes [all data]                     | $R_1 = 0.0360, wR_2 = 0.0891$                                 |
| Largest diff. peak/hole / $e \text{\AA}^{-3}$  | 0.51/-0.21                                                    |
| Flack parameter                                | 0.08(6)                                                       |

**Table S3 Fractional Atomic Coordinates ( $\times 10^4$ ) and Equivalent Isotropic Displacement Parameters ( $\text{\AA}^2 \times 10^3$ ) for 260316\_CON\_paiqin\_LJY.  $U_{\text{eq}}$  is defined as 1/3 of the trace of the orthogonalised  $U_{\text{IJ}}$  tensor.**

| Atom | x          | y          | z          | U(eq)   |
|------|------------|------------|------------|---------|
| O1   | 3741.6(18) | 2636.3(8)  | 4943.6(6)  | 25.6(3) |
| O2   | 391(2)     | 5184.1(9)  | 4741.8(9)  | 38.9(4) |
| O3   | 3759.2(17) | 4231.2(8)  | 5572.8(7)  | 26.1(3) |
| N1   | 6646.6(18) | 2984.6(10) | 3092.1(8)  | 25.1(3) |
| N2   | 3019.9(18) | 2739.4(9)  | 2968.5(7)  | 19.9(3) |
| N3   | 1091.6(18) | 3784.1(9)  | 4670.6(8)  | 22.6(3) |
| N4   | 4767(2)    | 5117.8(11) | 4702.2(8)  | 27.6(3) |
| N5   | 5227(2)    | 6910.3(10) | 4591.0(9)  | 28.8(3) |
| C1   | 8353(3)    | 3267.5(16) | 3236.6(14) | 40.7(5) |
| C2   | 6590(3)    | 2065.8(13) | 2950.9(12) | 34.9(5) |
| C3   | 5648(2)    | 3527.2(11) | 2662.3(9)  | 22.3(3) |
| C4   | 6334(2)    | 4234.4(12) | 2296.9(11) | 29.5(4) |
| C5   | 5358(3)    | 4788.4(13) | 1890.6(12) | 33.6(4) |
| C6   | 3640(3)    | 4670.4(12) | 1835.1(11) | 31.1(4) |
| C7   | 2926(2)    | 3991.9(11) | 2207.9(10) | 25.7(4) |
| C8   | 3885(2)    | 3430.6(11) | 2620.4(9)  | 20.4(3) |

**Table S3 Fractional Atomic Coordinates ( $\times 10^4$ ) and Equivalent Isotropic Displacement Parameters ( $\text{\AA}^2 \times 10^3$ ) for 260316\_CON\_paiqin\_LJY.  $U_{\text{eq}}$  is defined as 1/3 of the trace of the orthogonalised  $U_{\text{IJ}}$  tensor.**

| Atom | $x$     | $y$        | $z$        | $U(\text{eq})$ |
|------|---------|------------|------------|----------------|
| C9   | 2915(2) | 2548.3(10) | 3709.0(9)  | 19.1(3)        |
| C10  | 1981(2) | 1826.5(11) | 3804.6(9)  | 20.7(3)        |
| C11  | 1452(2) | 1541.2(10) | 3097.0(9)  | 19.6(3)        |
| C12  | 2123(2) | 2120.5(11) | 2587.1(9)  | 20.2(3)        |
| C13  | 1896(2) | 2025.1(12) | 1834.5(9)  | 24.4(3)        |
| C14  | 938(2)  | 1341.9(12) | 1603.1(10) | 26.7(4)        |
| C15  | 223(2)  | 766.5(12)  | 2103.0(10) | 25.7(4)        |
| C16  | 473(2)  | 857.4(11)  | 2843.8(10) | 22.5(3)        |
| C17  | 3709(2) | 3108.0(10) | 4276.0(9)  | 20.3(3)        |
| C18  | 2754(2) | 3956.4(10) | 4379.9(9)  | 19.9(3)        |
| C19  | 62(2)   | 4434.0(12) | 4839.1(10) | 28.3(4)        |
| C20  | 3774(2) | 4480.8(11) | 4929.7(9)  | 20.4(3)        |
| C21  | 5785(3) | 5588.3(13) | 5238.7(11) | 31.6(4)        |
| C22  | 5132(2) | 6494.5(13) | 5298.6(10) | 29.2(4)        |
| C23  | 4188(3) | 6454.4(13) | 4065.0(11) | 34.4(4)        |
| C24  | 4770(3) | 5536.5(13) | 3988.1(10) | 34.8(5)        |
| C25  | 4729(3) | 7807.7(14) | 4638.2(14) | 40.9(5)        |

**Table S4 Anisotropic Displacement Parameters ( $\text{\AA}^2 \times 10^3$ ) for 260316\_CON\_paiqin\_LJY. The Anisotropic displacement factor exponent takes the form:  $-2\pi^2[h^2a^*U_{11}+2hka^*b^*U_{12}+\dots]$ .**

| Atom | $U_{11}$ | $U_{22}$ | $U_{33}$ | $U_{23}$ | $U_{13}$ | $U_{12}$ |
|------|----------|----------|----------|----------|----------|----------|
| O1   | 35.6(7)  | 21.2(6)  | 19.9(6)  | -0.6(5)  | -5.9(5)  | 4.2(5)   |
| O2   | 44.5(8)  | 23.4(7)  | 48.7(9)  | 3.7(6)   | 4.1(7)   | 9.4(6)   |
| O3   | 33.4(7)  | 24.6(6)  | 20.3(6)  | 1.2(5)   | -4.4(5)  | -1.0(5)  |
| N1   | 19.6(7)  | 28.8(8)  | 26.9(7)  | 2.4(6)   | -2.6(6)  | 2.0(6)   |
| N2   | 20.5(6)  | 20.9(7)  | 18.3(7)  | 0.0(5)   | -0.3(5)  | -3.2(6)  |
| N3   | 19.6(7)  | 20.7(7)  | 27.5(7)  | -0.4(5)  | -0.2(6)  | 1.2(6)   |
| N4   | 32.8(8)  | 26.5(7)  | 23.4(7)  | -1.6(6)  | -0.6(6)  | -9.5(7)  |
| N5   | 30.7(8)  | 25.3(8)  | 30.3(8)  | -3.6(6)  | 2.3(6)   | -3.5(7)  |
| C1   | 23.2(9)  | 51.1(13) | 47.8(13) | 10.0(10) | -10.6(9) | -1.6(9)  |
| C2   | 35.1(10) | 30.6(10) | 39.0(11) | -2.4(8)  | -6.2(8)  | 12.2(9)  |
| C3   | 21.8(8)  | 23.6(8)  | 21.6(8)  | 0.9(6)   | -0.7(6)  | 0.4(7)   |
| C4   | 23.6(8)  | 31.3(9)  | 33.7(9)  | 4.4(8)   | 1.0(7)   | -6.8(8)  |
| C5   | 34.8(10) | 28.5(9)  | 37.5(10) | 10.2(8)  | 1.2(8)   | -7.8(8)  |
| C6   | 32.3(10) | 26.4(9)  | 34.7(10) | 9.4(7)   | -2.0(8)  | 2.6(8)   |

**Table S4 Anisotropic Displacement Parameters ( $\text{\AA}^2 \times 10^3$ ) for 260316\_CON\_paiqin\_LJY. The Anisotropic displacement factor exponent takes the form:  $-2\pi^2[h^2a^2U_{11}+2hka^*b^*U_{12}+\dots]$ .**

| Atom | $U_{11}$ | $U_{22}$ | $U_{33}$ | $U_{23}$ | $U_{13}$ | $U_{12}$ |
|------|----------|----------|----------|----------|----------|----------|
| C7   | 21.8(8)  | 27.3(8)  | 27.9(9)  | 2.9(7)   | -2.4(7)  | 1.3(7)   |
| C8   | 21.9(8)  | 19.8(7)  | 19.6(8)  | 0.3(6)   | 0.4(6)   | -0.2(6)  |
| C9   | 19.2(7)  | 19.9(7)  | 18.3(7)  | -0.9(6)  | 0.6(6)   | 2.5(6)   |
| C10  | 21.6(8)  | 21.4(7)  | 19.1(7)  | 0.5(6)   | 1.1(6)   | 0.6(6)   |
| C11  | 18.1(7)  | 19.7(7)  | 21.1(8)  | -0.3(6)  | 1.5(6)   | 2.5(6)   |
| C12  | 18.3(7)  | 22.0(8)  | 20.3(8)  | -2.0(6)  | -0.5(6)  | 0.3(6)   |
| C13  | 25.0(8)  | 28.9(9)  | 19.4(8)  | 0.3(7)   | 0.7(6)   | -1.8(7)  |
| C14  | 29.4(9)  | 29.9(9)  | 20.6(8)  | -4.5(7)  | -2.0(7)  | 0.4(8)   |
| C15  | 24.1(8)  | 25.0(8)  | 28.1(9)  | -5.2(7)  | -2.0(7)  | -1.0(7)  |
| C16  | 20.7(8)  | 21.0(8)  | 25.7(8)  | -2.2(6)  | 1.3(6)   | -0.8(7)  |
| C17  | 20.9(8)  | 21.5(8)  | 18.6(7)  | -1.0(6)  | -1.4(6)  | 0.5(7)   |
| C18  | 21.5(8)  | 18.8(7)  | 19.3(8)  | 0.6(6)   | -1.0(6)  | -0.4(6)  |
| C19  | 26.3(9)  | 28.1(9)  | 30.7(9)  | 0.2(7)   | -0.3(7)  | 5.6(7)   |
| C20  | 21.2(8)  | 17.9(7)  | 22.1(8)  | -1.5(6)  | 0.0(6)   | 1.2(6)   |
| C21  | 31.5(10) | 29.9(10) | 33.4(10) | -1.2(8)  | -6.9(8)  | -10.3(8) |
| C22  | 30.4(9)  | 32.1(10) | 25.2(9)  | -6.9(7)  | 1.6(7)   | -6.5(8)  |
| C23  | 43.1(11) | 34.1(10) | 26.2(9)  | 3.6(7)   | -5.6(8)  | -10.5(9) |
| C24  | 49.6(12) | 31.7(10) | 23.0(9)  | -1.7(7)  | 6.4(8)   | -17.7(9) |
| C25  | 40.2(11) | 29.5(10) | 53.0(13) | -4.6(9)  | 1.2(10)  | 1.4(9)   |

**Table S5 Bond Lengths for 260316\_CON\_paiqin\_LJY.**

| Atom | Atom | Length/ $\text{\AA}$ | Atom | Atom | Length/ $\text{\AA}$ |
|------|------|----------------------|------|------|----------------------|
| O1   | C17  | 1.4298(19)           | C3   | C8   | 1.415(2)             |
| O2   | C19  | 1.217(2)             | C4   | C5   | 1.383(3)             |
| O3   | C20  | 1.242(2)             | C5   | C6   | 1.384(3)             |
| N1   | C1   | 1.454(2)             | C6   | C7   | 1.386(3)             |
| N1   | C2   | 1.462(3)             | C7   | C8   | 1.389(2)             |
| N1   | C3   | 1.405(2)             | C9   | C10  | 1.365(2)             |
| N2   | C8   | 1.433(2)             | C9   | C17  | 1.500(2)             |
| N2   | C9   | 1.393(2)             | C10  | C11  | 1.435(2)             |
| N2   | C12  | 1.392(2)             | C11  | C12  | 1.408(2)             |
| N3   | C18  | 1.453(2)             | C11  | C16  | 1.404(2)             |
| N3   | C19  | 1.343(2)             | C12  | C13  | 1.400(2)             |
| N4   | C20  | 1.340(2)             | C13  | C14  | 1.381(3)             |
| N4   | C21  | 1.473(2)             | C14  | C15  | 1.406(3)             |
| N4   | C24  | 1.464(2)             | C15  | C16  | 1.380(3)             |

**Table S5 Bond Lengths for 260316\_CON\_paiqin\_LJY.**

| Atom | Atom | Length/Å | Atom | Atom | Length/Å |
|------|------|----------|------|------|----------|
| N5   | C22  | 1.453(3) | C17  | C18  | 1.543(2) |
| N5   | C23  | 1.458(2) | C18  | C20  | 1.533(2) |
| N5   | C25  | 1.463(3) | C21  | C22  | 1.516(3) |
| C3   | C4   | 1.405(2) | C23  | C24  | 1.517(3) |

**Table S6 Bond Angles for 260316\_CON\_paiqin\_LJY.**

| Atom | Atom | Atom | Angle/°    | Atom | Atom | Atom | Angle/°    |
|------|------|------|------------|------|------|------|------------|
| C1   | N1   | C2   | 111.14(17) | C9   | C10  | C11  | 107.55(15) |
| C3   | N1   | C1   | 116.55(16) | C12  | C11  | C10  | 106.76(14) |
| C3   | N1   | C2   | 118.56(15) | C16  | C11  | C10  | 134.37(16) |
| C9   | N2   | C8   | 128.70(14) | C16  | C11  | C12  | 118.86(15) |
| C12  | N2   | C8   | 123.28(13) | N2   | C12  | C11  | 108.03(14) |
| C12  | N2   | C9   | 108.02(13) | N2   | C12  | C13  | 129.48(16) |
| C19  | N3   | C18  | 120.02(15) | C13  | C12  | C11  | 122.47(16) |
| C20  | N4   | C21  | 119.32(15) | C14  | C13  | C12  | 117.19(17) |
| C20  | N4   | C24  | 127.80(16) | C13  | C14  | C15  | 121.35(16) |
| C24  | N4   | C21  | 111.86(15) | C16  | C15  | C14  | 121.14(17) |
| C22  | N5   | C23  | 109.99(15) | C15  | C16  | C11  | 118.96(16) |
| C22  | N5   | C25  | 111.31(16) | O1   | C17  | C9   | 107.41(13) |
| C23  | N5   | C25  | 110.85(17) | O1   | C17  | C18  | 110.36(13) |
| N1   | C3   | C8   | 121.85(16) | C9   | C17  | C18  | 112.36(13) |
| C4   | C3   | N1   | 121.60(16) | N3   | C18  | C17  | 109.58(13) |
| C4   | C3   | C8   | 116.37(16) | N3   | C18  | C20  | 109.96(13) |
| C5   | C4   | C3   | 122.20(17) | C20  | C18  | C17  | 106.30(13) |
| C4   | C5   | C6   | 120.77(18) | O2   | C19  | N3   | 124.49(19) |
| C5   | C6   | C7   | 118.18(18) | O3   | C20  | N4   | 122.38(16) |
| C6   | C7   | C8   | 121.86(17) | O3   | C20  | C18  | 116.78(15) |
| C3   | C8   | N2   | 122.26(16) | N4   | C20  | C18  | 120.46(15) |
| C7   | C8   | N2   | 117.14(15) | N4   | C21  | C22  | 109.13(16) |
| C7   | C8   | C3   | 120.55(16) | N5   | C22  | C21  | 109.68(16) |
| N2   | C9   | C17  | 121.66(15) | N5   | C23  | C24  | 110.60(17) |
| C10  | C9   | N2   | 109.63(14) | N4   | C24  | C23  | 109.92(16) |
| C10  | C9   | C17  | 128.69(15) |      |      |      |            |

**Table S7 Torsion Angles for 260316\_CON\_paiqin\_LJY.**

| A  | B   | C   | D   | Angle/°    | A   | B   | C   | D   | Angle/°     |
|----|-----|-----|-----|------------|-----|-----|-----|-----|-------------|
| O1 | C17 | C18 | N3  | -54.71(17) | C9  | C17 | C18 | C20 | -176.08(14) |
| O1 | C17 | C18 | C20 | 64.08(17)  | C10 | C9  | C17 | O1  | 16.3(2)     |

**Table S7 Torsion Angles for 260316\_CON\_paiqin\_LJY.**

| A  | B   | C   | D   | Angle/°     | A   | B   | C   | D   | Angle/°     |
|----|-----|-----|-----|-------------|-----|-----|-----|-----|-------------|
| N1 | C3  | C4  | C5  | -177.98(18) | C10 | C9  | C17 | C18 | -105.29(19) |
| N1 | C3  | C8  | N2  | -4.7(3)     | C10 | C11 | C12 | N2  | -0.31(18)   |
| N1 | C3  | C8  | C7  | 178.11(16)  | C10 | C11 | C12 | C13 | 178.23(16)  |
| N2 | C9  | C10 | C11 | -0.29(19)   | C10 | C11 | C16 | C15 | -179.36(18) |
| N2 | C9  | C17 | O1  | -165.80(14) | C11 | C12 | C13 | C14 | 1.6(3)      |
| N2 | C9  | C17 | C18 | 72.7(2)     | C12 | N2  | C8  | C3  | -116.75(19) |
| N2 | C12 | C13 | C14 | 179.76(17)  | C12 | N2  | C8  | C7  | 60.6(2)     |
| N3 | C18 | C20 | O3  | 47.3(2)     | C12 | N2  | C9  | C10 | 0.10(19)    |
| N3 | C18 | C20 | N4  | -139.67(16) | C12 | N2  | C9  | C17 | -178.20(15) |
| N4 | C21 | C22 | N5  | -59.3(2)    | C12 | C11 | C16 | C15 | 1.1(2)      |
| N5 | C23 | C24 | N4  | 56.1(2)     | C12 | C13 | C14 | C15 | 0.0(3)      |
| C1 | N1  | C3  | C4  | 9.7(3)      | C13 | C14 | C15 | C16 | -0.9(3)     |
| C1 | N1  | C3  | C8  | -165.22(18) | C14 | C15 | C16 | C11 | 0.4(3)      |
| C2 | N1  | C3  | C4  | -127.22(19) | C16 | C11 | C12 | N2  | 179.34(15)  |
| C2 | N1  | C3  | C8  | 57.8(2)     | C16 | C11 | C12 | C13 | -2.1(3)     |
| C3 | C4  | C5  | C6  | 0.8(3)      | C17 | C9  | C10 | C11 | 177.85(16)  |
| C4 | C3  | C8  | N2  | -179.88(16) | C17 | C18 | C20 | O3  | -71.26(19)  |
| C4 | C3  | C8  | C7  | 2.9(3)      | C17 | C18 | C20 | N4  | 101.80(18)  |
| C4 | C5  | C6  | C7  | 1.1(3)      | C18 | N3  | C19 | O2  | 2.8(3)      |
| C5 | C6  | C7  | C8  | -0.9(3)     | C19 | N3  | C18 | C17 | 176.72(15)  |
| C6 | C7  | C8  | N2  | -178.51(17) | C19 | N3  | C18 | C20 | 60.2(2)     |
| C6 | C7  | C8  | C3  | -1.1(3)     | C20 | N4  | C21 | C22 | -112.21(19) |
| C8 | N2  | C9  | C10 | -179.29(16) | C20 | N4  | C24 | C23 | 112.8(2)    |
| C8 | N2  | C9  | C17 | 2.4(3)      | C21 | N4  | C20 | O3  | -4.9(3)     |
| C8 | N2  | C12 | C11 | 179.57(15)  | C21 | N4  | C20 | C18 | -177.54(16) |
| C8 | N2  | C12 | C13 | 1.2(3)      | C21 | N4  | C24 | C23 | -55.5(2)    |
| C8 | C3  | C4  | C5  | -2.7(3)     | C22 | N5  | C23 | C24 | -59.5(2)    |
| C9 | N2  | C8  | C3  | 62.6(2)     | C23 | N5  | C22 | C21 | 61.2(2)     |
| C9 | N2  | C8  | C7  | -120.13(19) | C24 | N4  | C20 | O3  | -172.34(19) |
| C9 | N2  | C12 | C11 | 0.14(18)    | C24 | N4  | C20 | C18 | 15.0(3)     |
| C9 | N2  | C12 | C13 | -178.26(18) | C24 | N4  | C21 | C22 | 57.1(2)     |
| C9 | C10 | C11 | C12 | 0.37(18)    | C25 | N5  | C22 | C21 | -175.57(17) |
| C9 | C10 | C11 | C16 | -179.20(18) | C25 | N5  | C23 | C24 | 176.93(17)  |
| C9 | C17 | C18 | N3  | 65.14(17)   |     |     |     |     |             |

**Table S8 Hydrogen Atom Coordinates ( $\text{\AA} \times 10^4$ ) and Isotropic Displacement Parameters ( $\text{\AA}^2 \times 10^3$ ) for 260316\_CON\_paiqin\_LJY.**

| Atom | x | y | z | U(eq) |
|------|---|---|---|-------|
|------|---|---|---|-------|

**Table S8 Hydrogen Atom Coordinates ( $\text{\AA}\times 10^4$ ) and Isotropic Displacement Parameters ( $\text{\AA}^2\times 10^3$ ) for 260316\_CON\_paiqin\_LJY.**

| Atom | x       | y       | z       | U(eq) |
|------|---------|---------|---------|-------|
| H1   | 3828.95 | 2975.97 | 5296.21 | 38    |
| H1A  | 9000.35 | 3260.16 | 2782.03 | 61    |
| H1B  | 8878.38 | 2883.6  | 3591.74 | 61    |
| H1C  | 8331.05 | 3849.29 | 3433.28 | 61    |
| H2A  | 5442.57 | 1899.25 | 2821.3  | 52    |
| H2B  | 6941.13 | 1755.79 | 3389.5  | 52    |
| H2C  | 7349.11 | 1926.66 | 2547.4  | 52    |
| H4   | 7507    | 4335.45 | 2330.07 | 35    |
| H5   | 5871.65 | 5255.35 | 1646.58 | 40    |
| H6   | 2970.19 | 5044.42 | 1549.36 | 37    |
| H7   | 1746.09 | 3908.45 | 2180.54 | 31    |
| H10  | 1726.21 | 1561.15 | 4257.28 | 25    |
| H13  | 2379.9  | 2414.07 | 1497.05 | 29    |
| H14  | 758.61  | 1259.07 | 1095.81 | 32    |
| H15  | -443.57 | 307.22  | 1927.76 | 31    |
| H16  | -10.48  | 463.35  | 3177.21 | 27    |
| H17  | 4889.05 | 3237.06 | 4125.62 | 24    |
| H18  | 2667.3  | 4268.24 | 3905.36 | 24    |
| H19  | -995.52 | 4298.67 | 5048.56 | 34    |
| H21A | 6974.69 | 5595.07 | 5082.61 | 38    |
| H21B | 5718.5  | 5302.9  | 5719.66 | 38    |
| H22A | 3953.29 | 6487.07 | 5469.82 | 35    |
| H22B | 5809.84 | 6816.5  | 5657.97 | 35    |
| H23A | 4252.87 | 6743.19 | 3585.43 | 41    |
| H23B | 3003.05 | 6464.31 | 4227.7  | 41    |
| H24A | 4013.38 | 5226.33 | 3651.46 | 42    |
| H24B | 5916.5  | 5523.93 | 3780.26 | 42    |
| H25A | 5531.01 | 8117.65 | 4945.34 | 61    |
| H25B | 3605.16 | 7848.2  | 4852.3  | 61    |
| H25C | 4719.11 | 8058.68 | 4148.55 | 61    |

## 10. NMR spectra

<sup>1</sup>H NMR of 3aa (400 MHz, DMSO-d<sub>6</sub>)

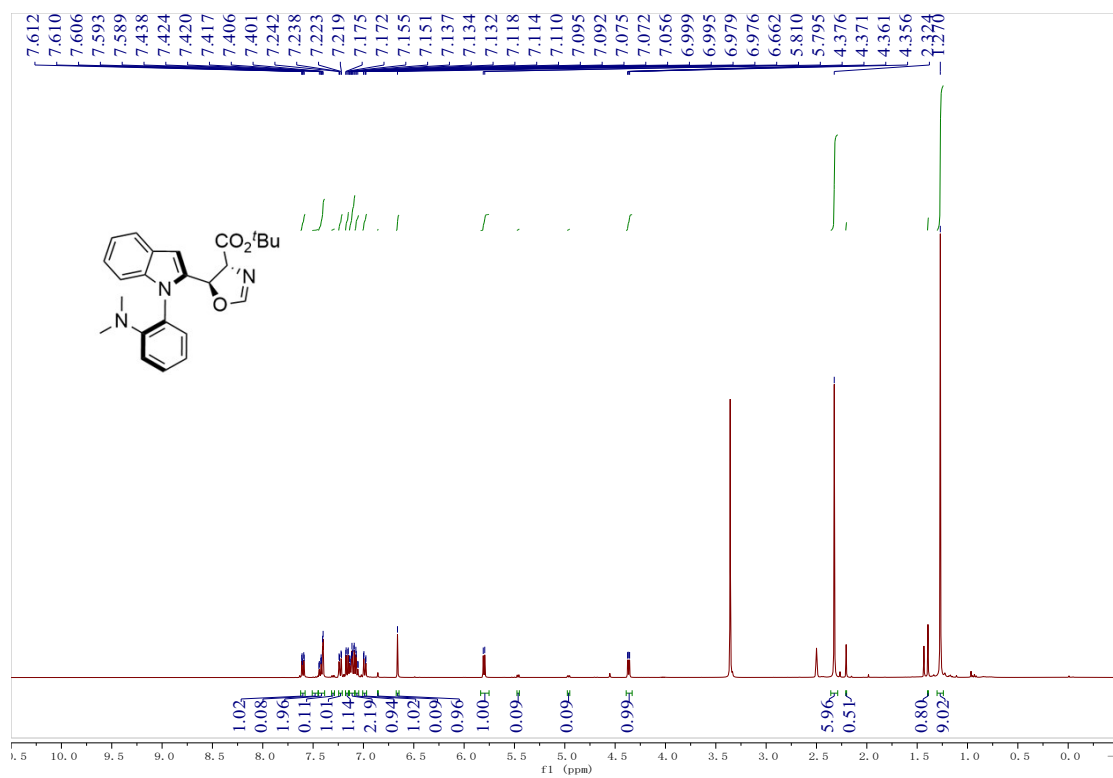

<sup>13</sup>C NMR of 3aa (100 MHz, DMSO-d<sub>6</sub>)

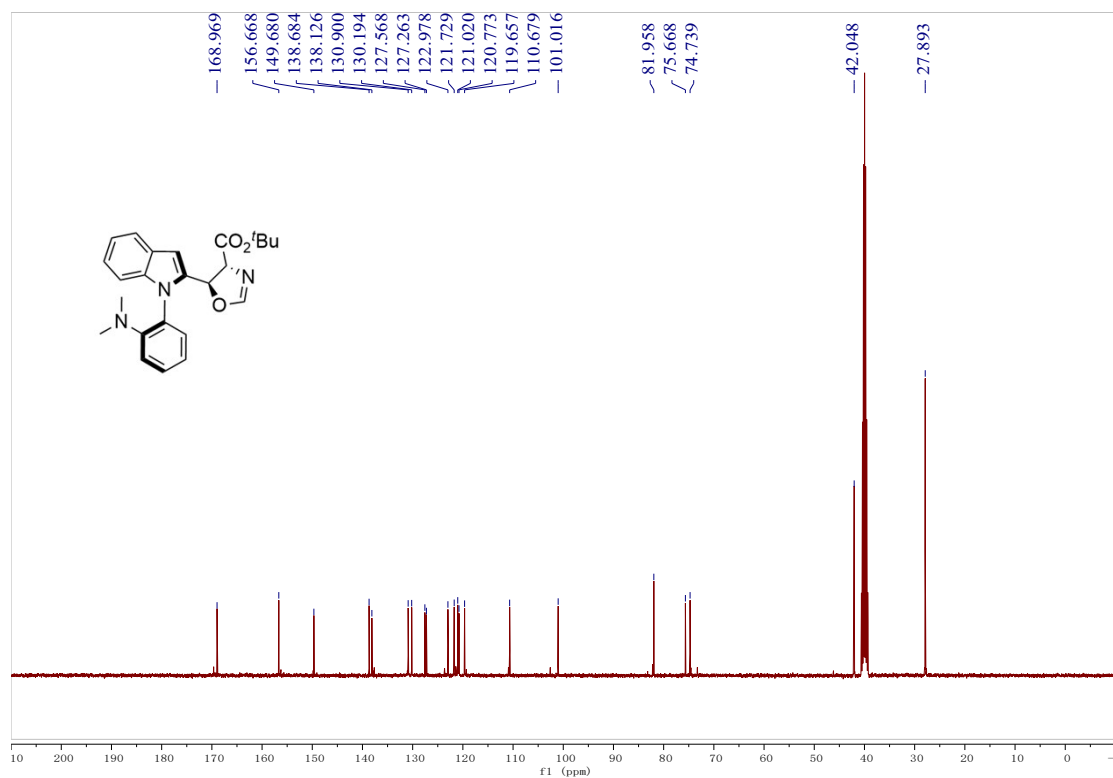

### <sup>1</sup>H NMR of 3ba (400 MHz, DMSO-d<sub>6</sub>)

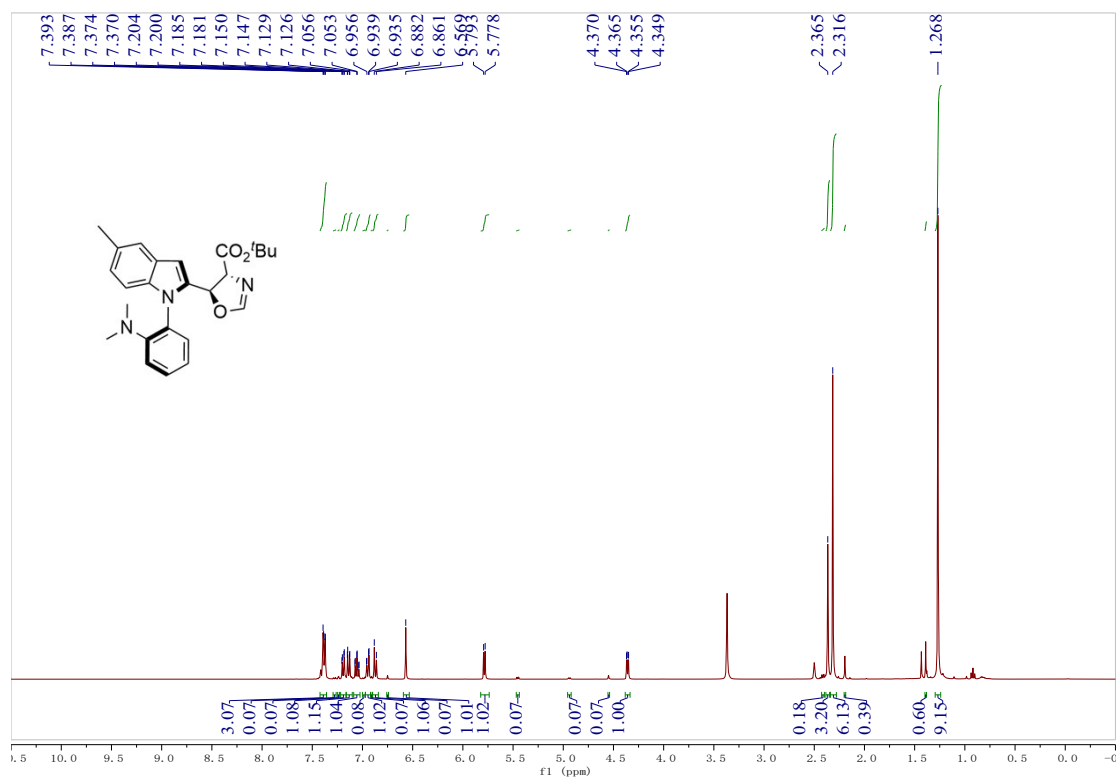

### <sup>13</sup>C NMR of 3ba (100 MHz, DMSO-d<sub>6</sub>)

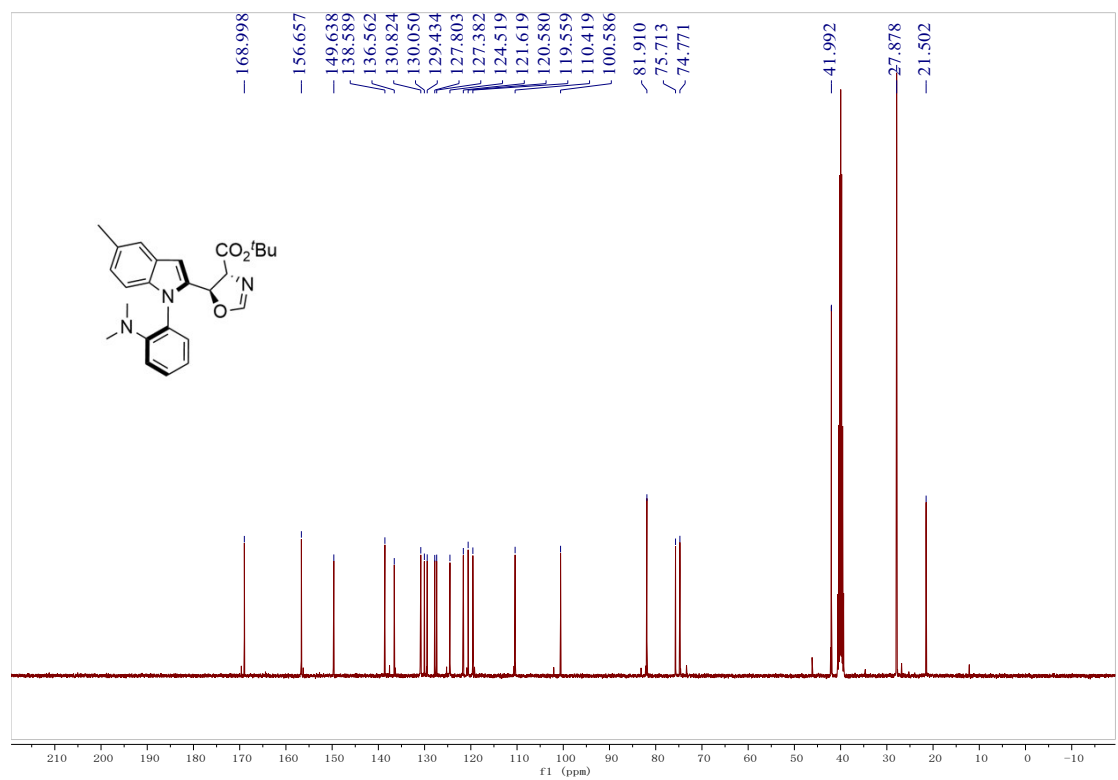

### <sup>1</sup>H NMR of 3a (400 MHz, DMSO-d<sub>6</sub>)

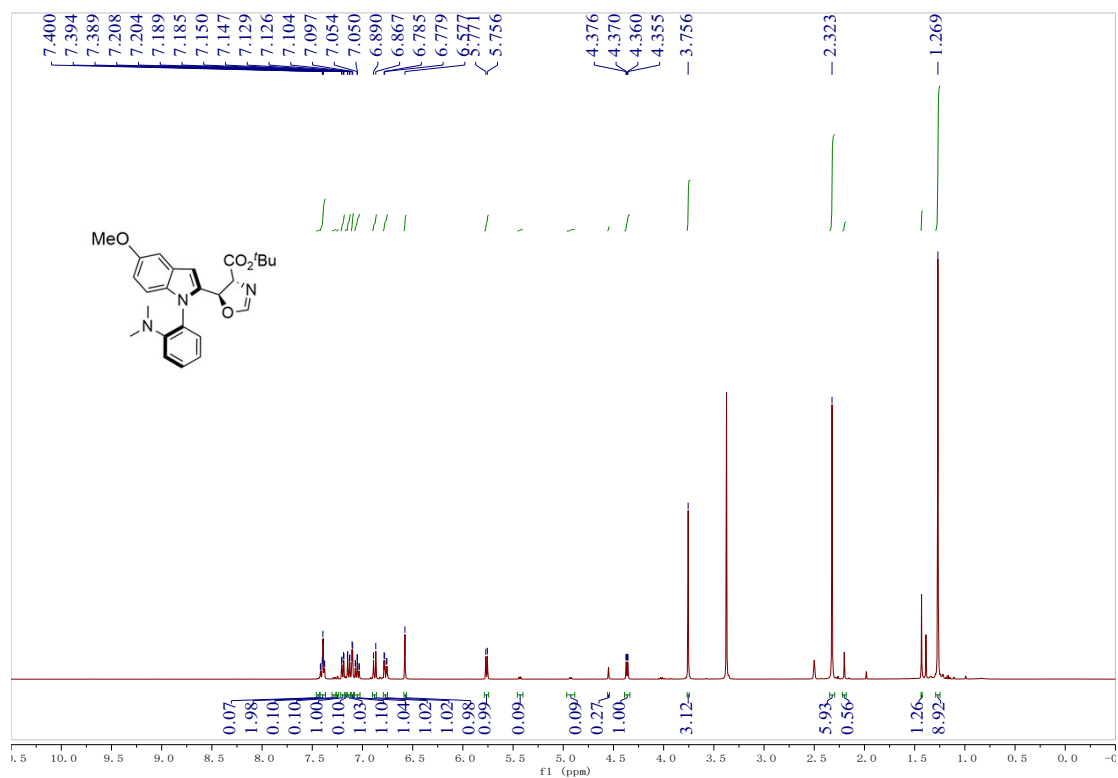

### <sup>13</sup>C NMR of 3a (100 MHz, DMSO-d<sub>6</sub>)

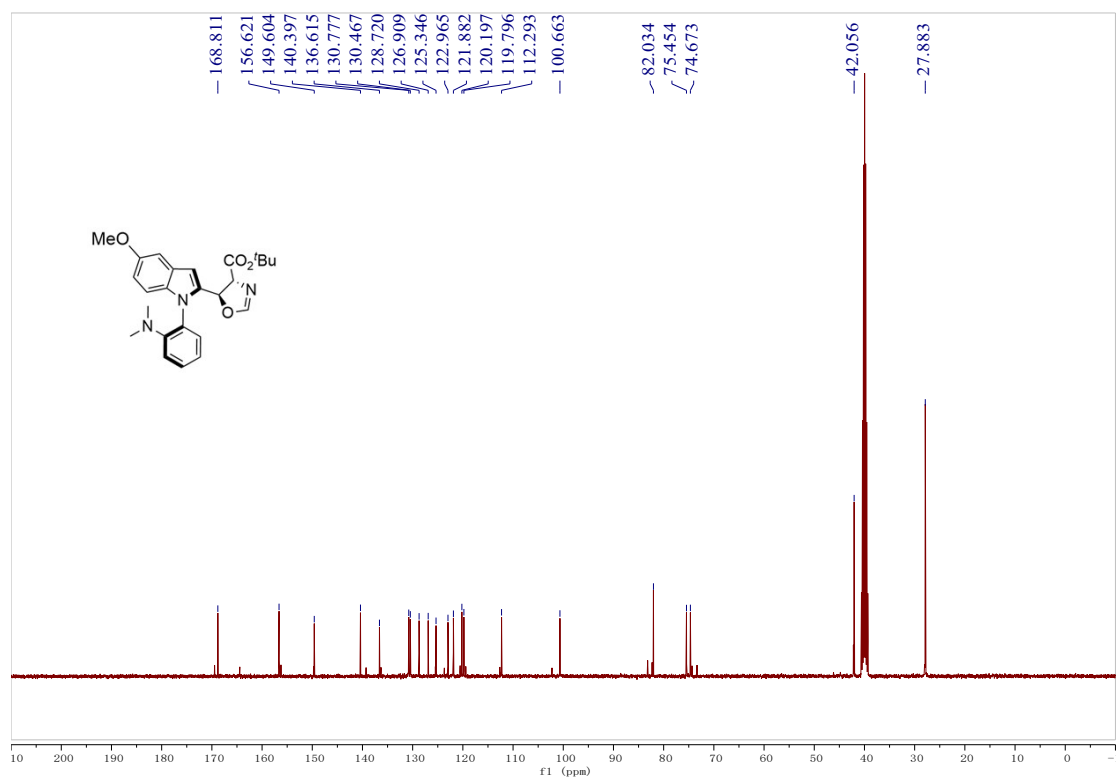

### <sup>1</sup>H NMR of 3da (400 MHz, DMSO-d<sub>6</sub>)

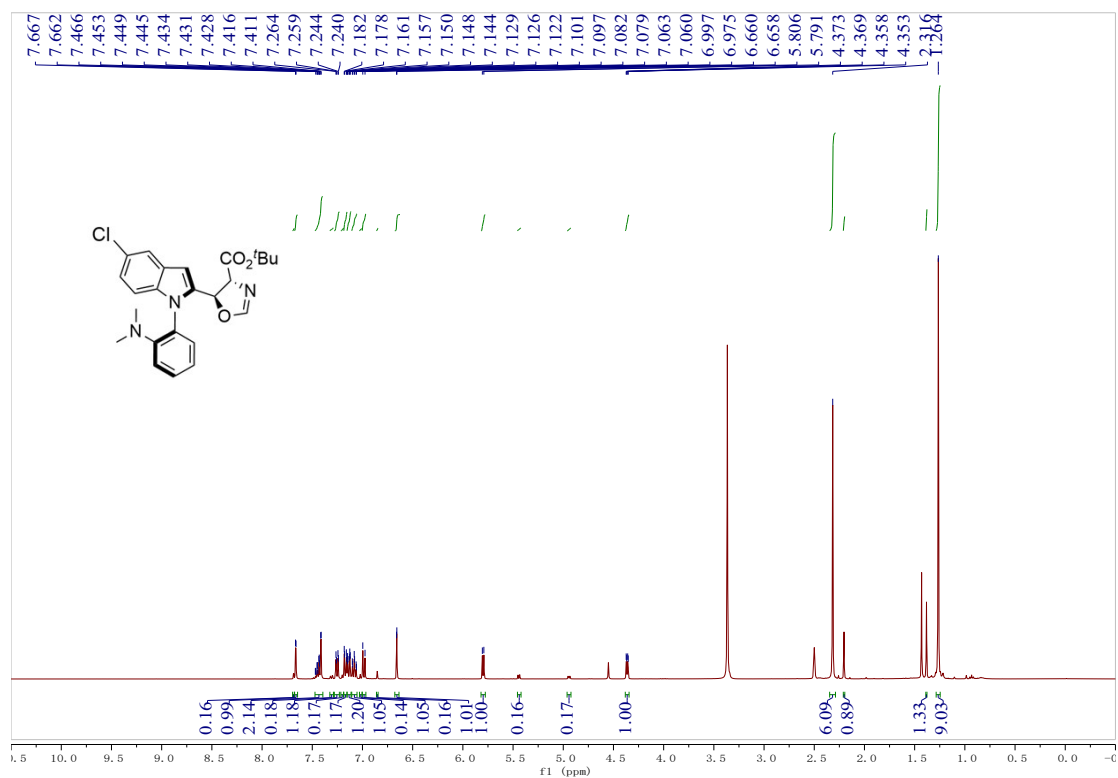

### <sup>13</sup>C NMR of 3da (100 MHz, DMSO-d<sub>6</sub>)

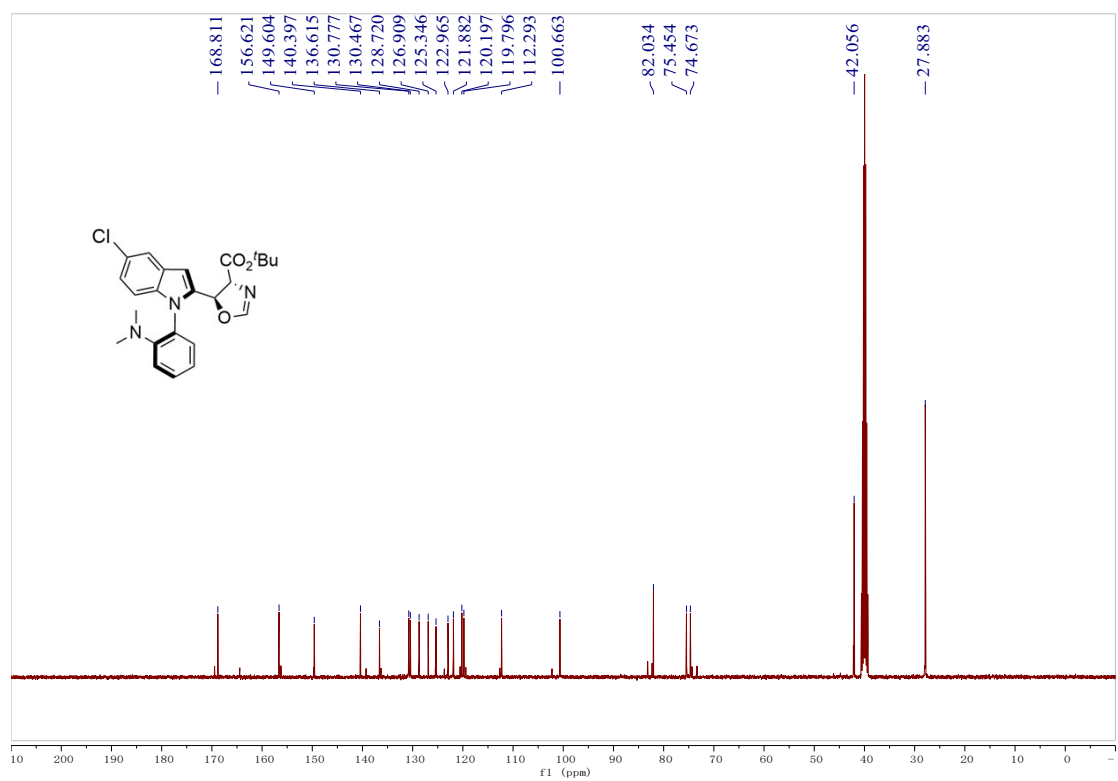

### <sup>1</sup>H NMR of 3ea (400 MHz, DMSO-d<sub>6</sub>)

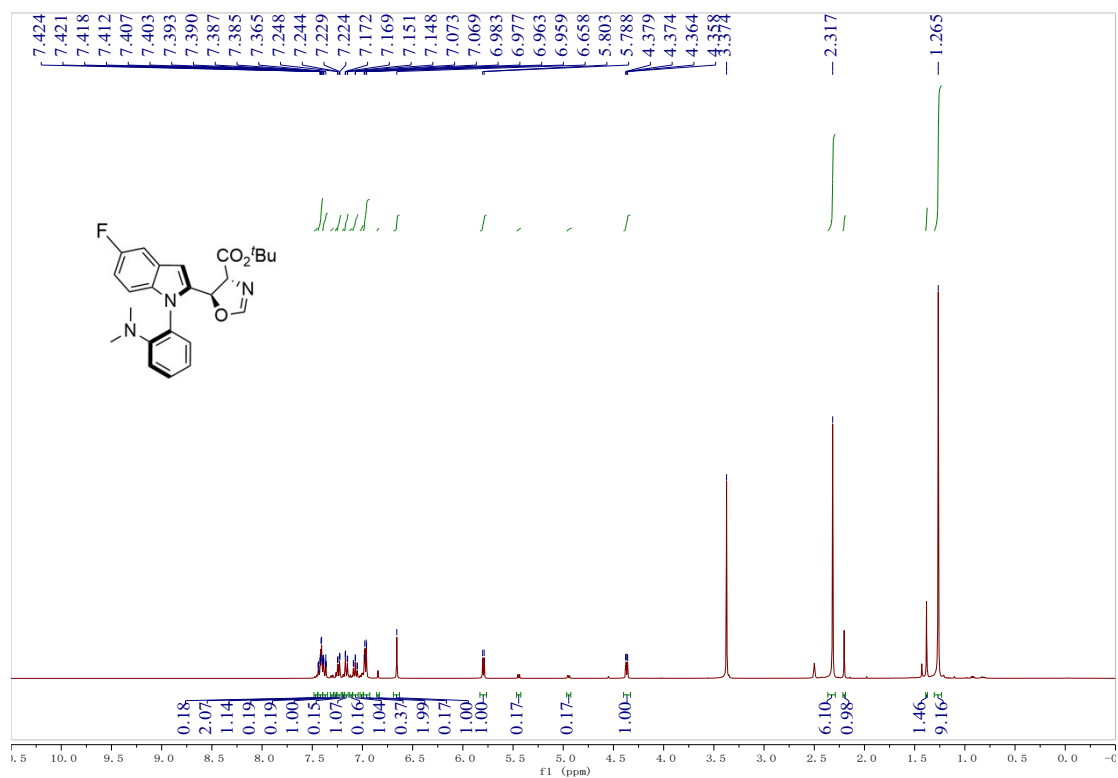

### <sup>13</sup>C NMR of 3ea (100 MHz, DMSO-d<sub>6</sub>)

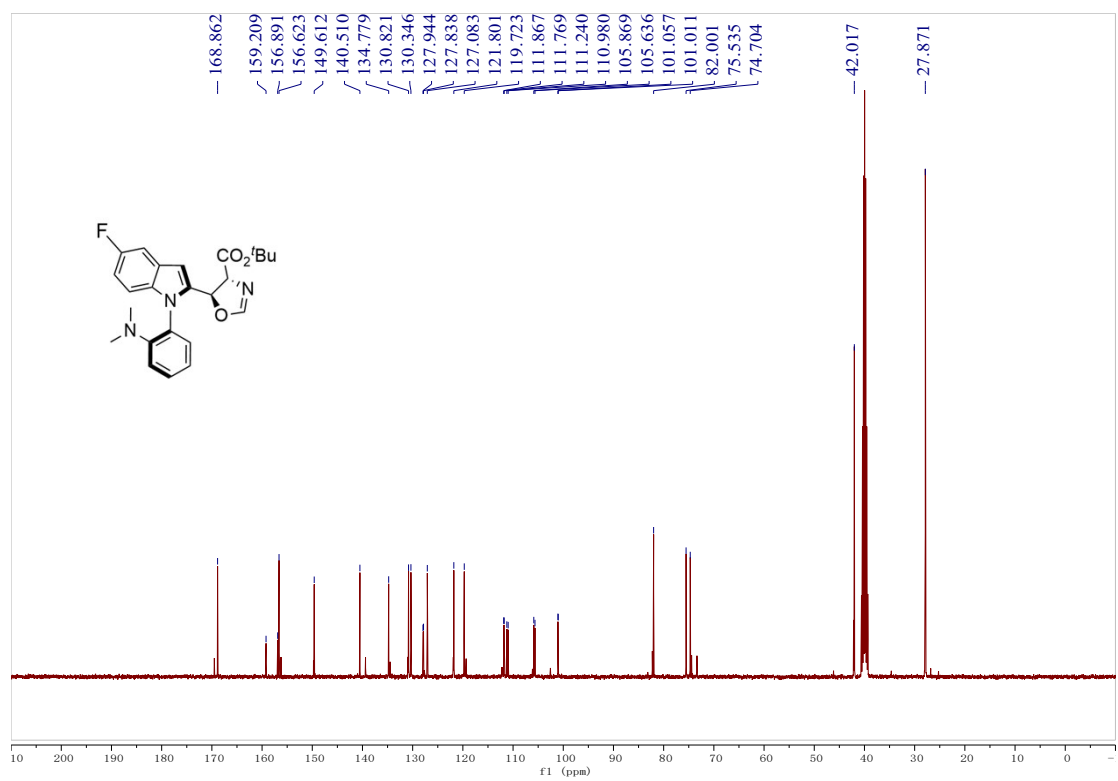

**<sup>19</sup>F NMR of 3ea (376 MHz, DMSO-*d*<sub>6</sub>)**

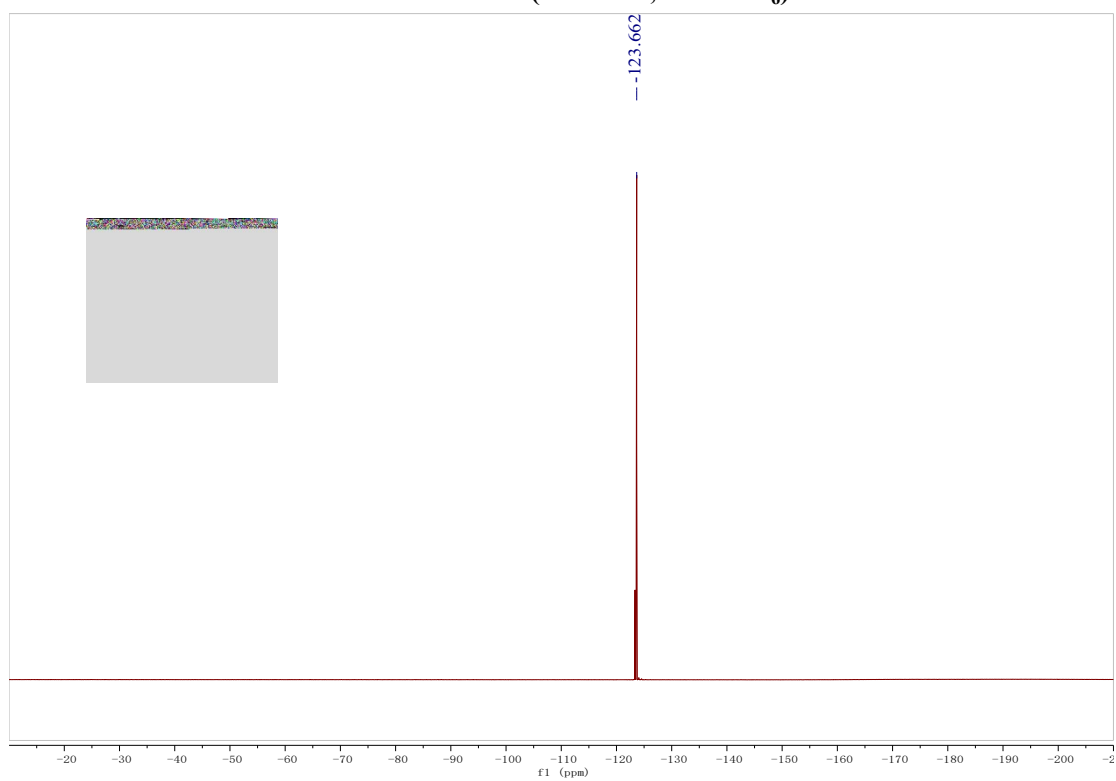

**<sup>1</sup>H NMR of 3fa (400 MHz, DMSO-*d*<sub>6</sub>)**

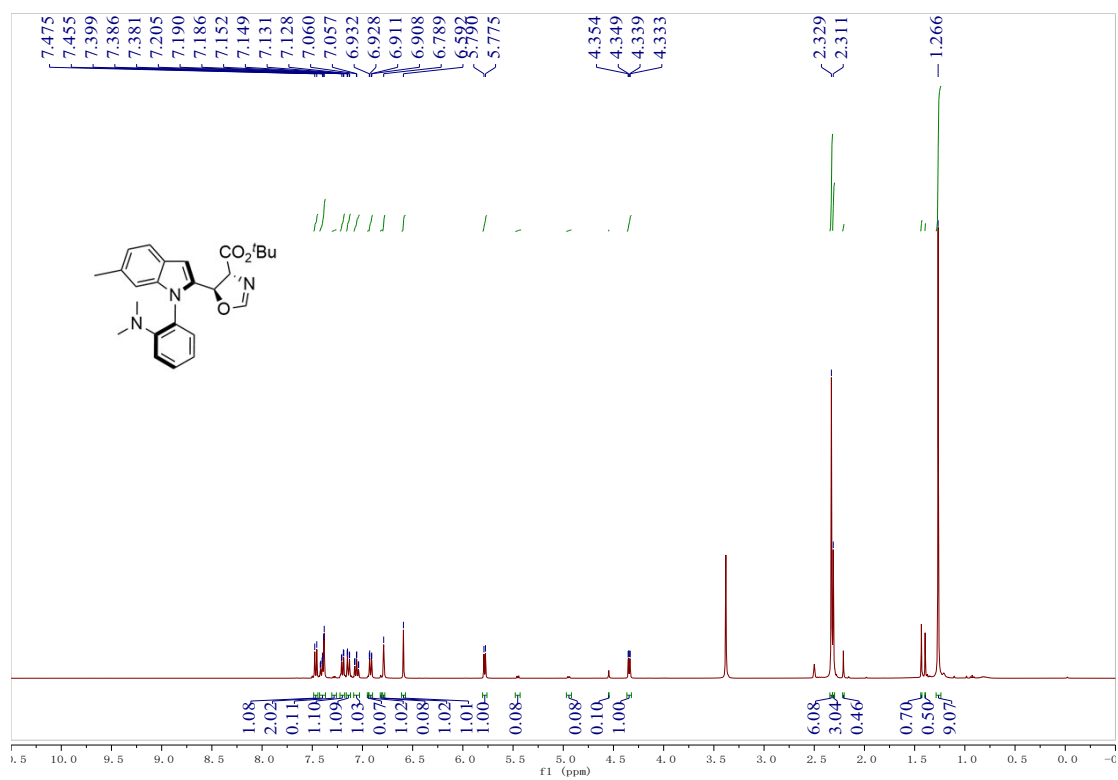

**<sup>13</sup>C NMR of 3fa (100 MHz, DMSO-d<sub>6</sub>)**

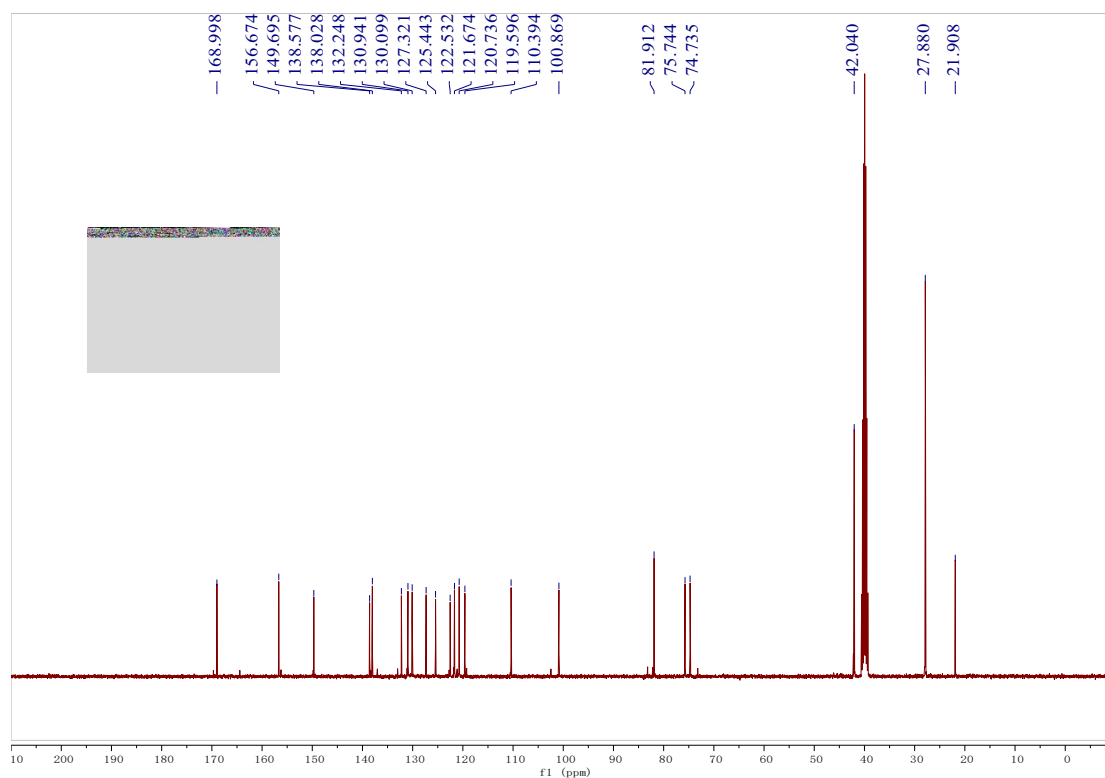

**<sup>1</sup>H NMR of 3ga (400 MHz, DMSO-d<sub>6</sub>)**

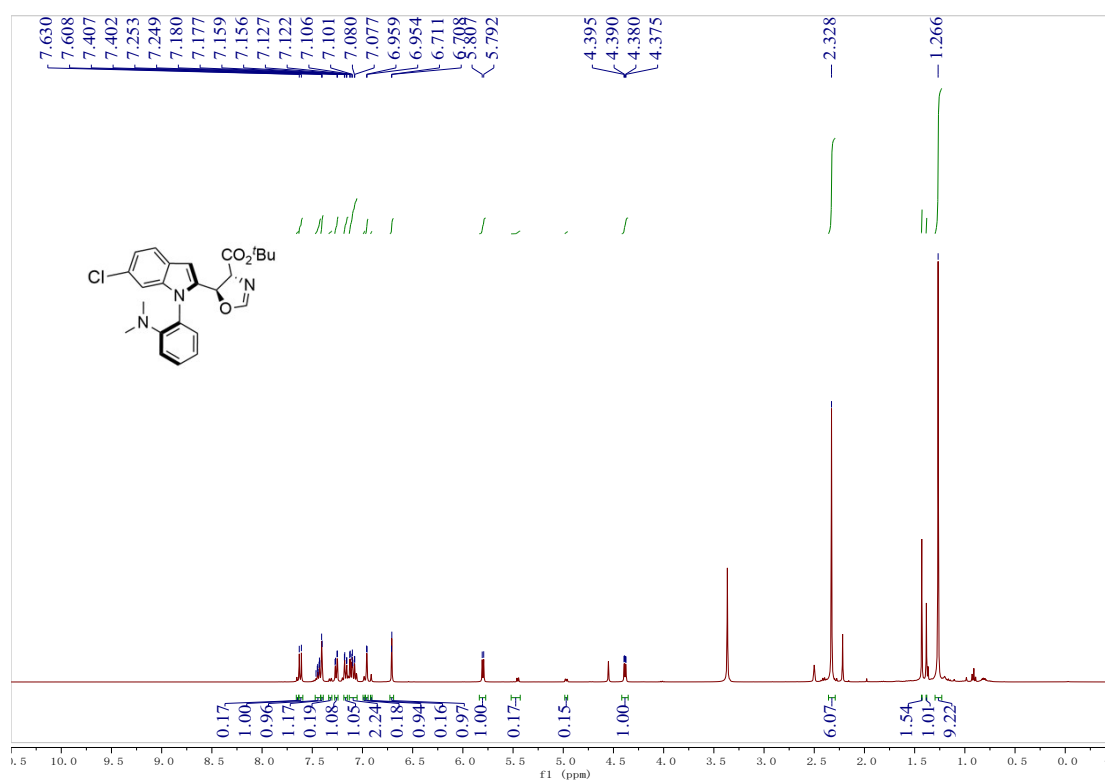

**<sup>13</sup>C NMR of 3ga (100 MHz, DMSO-d<sub>6</sub>)**

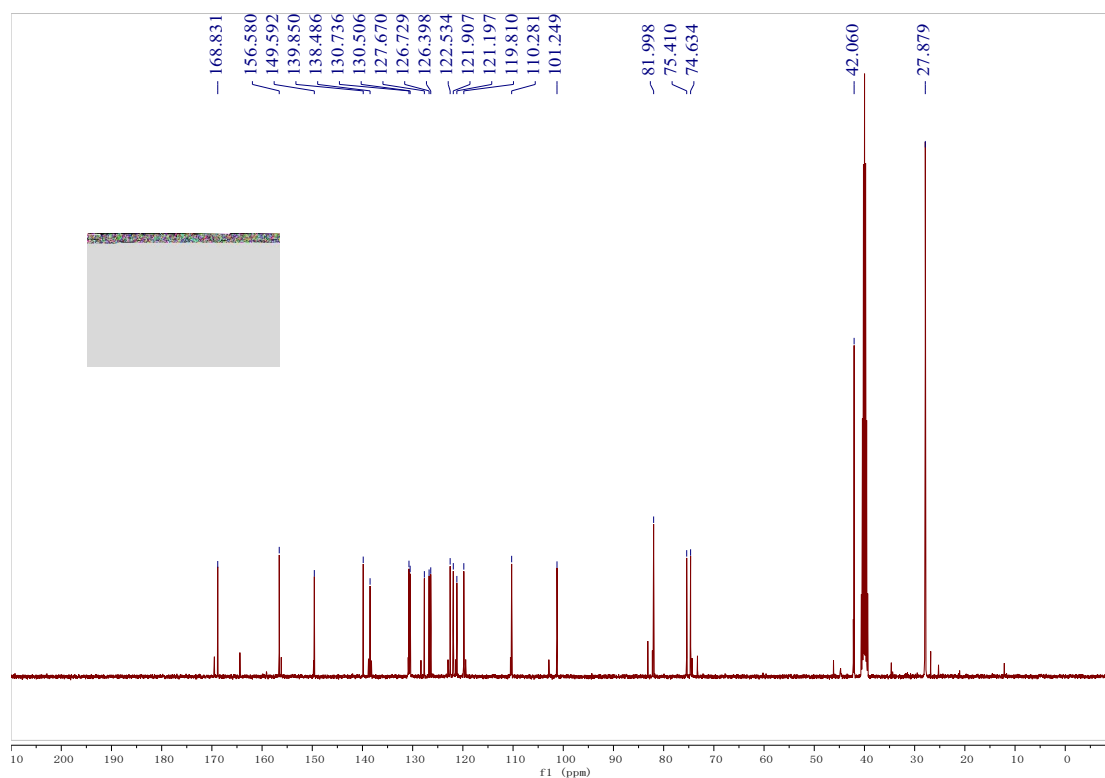

**<sup>1</sup>H NMR of 3ha (400 MHz, DMSO-d<sub>6</sub>)**

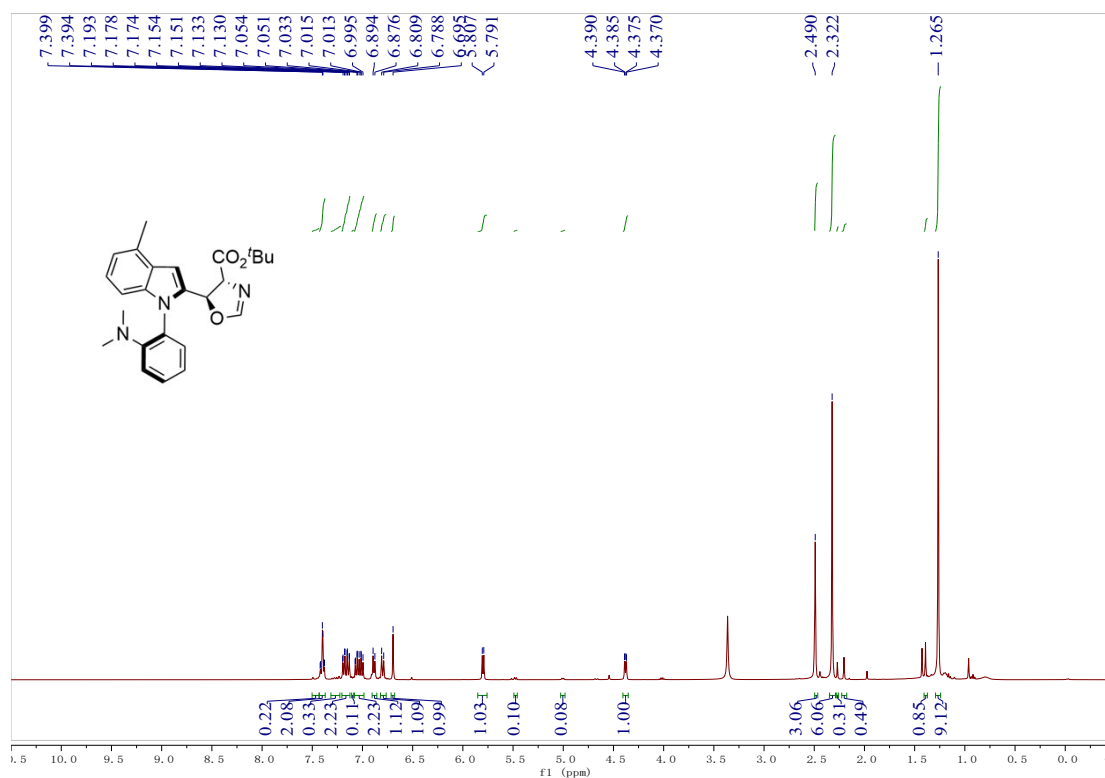

**<sup>13</sup>C NMR of 3ha (100 MHz, DMSO-d<sub>6</sub>)**

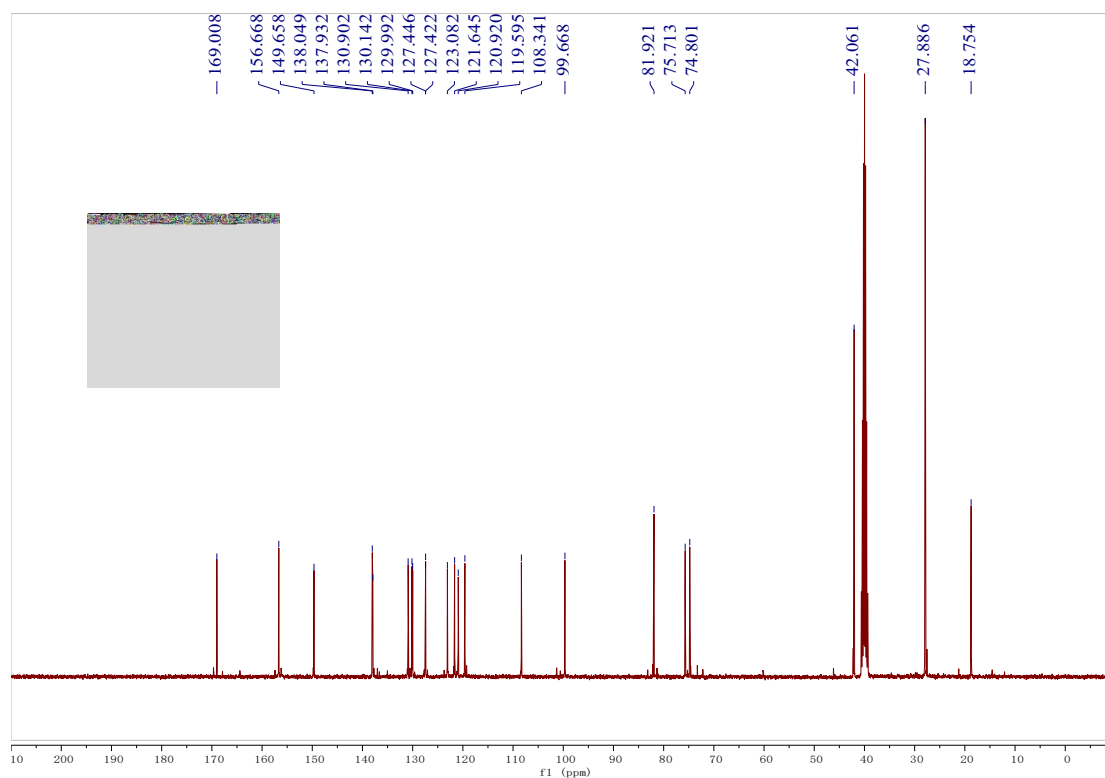

**<sup>1</sup>H NMR of 3ia (400 MHz, DMSO-d<sub>6</sub>)**

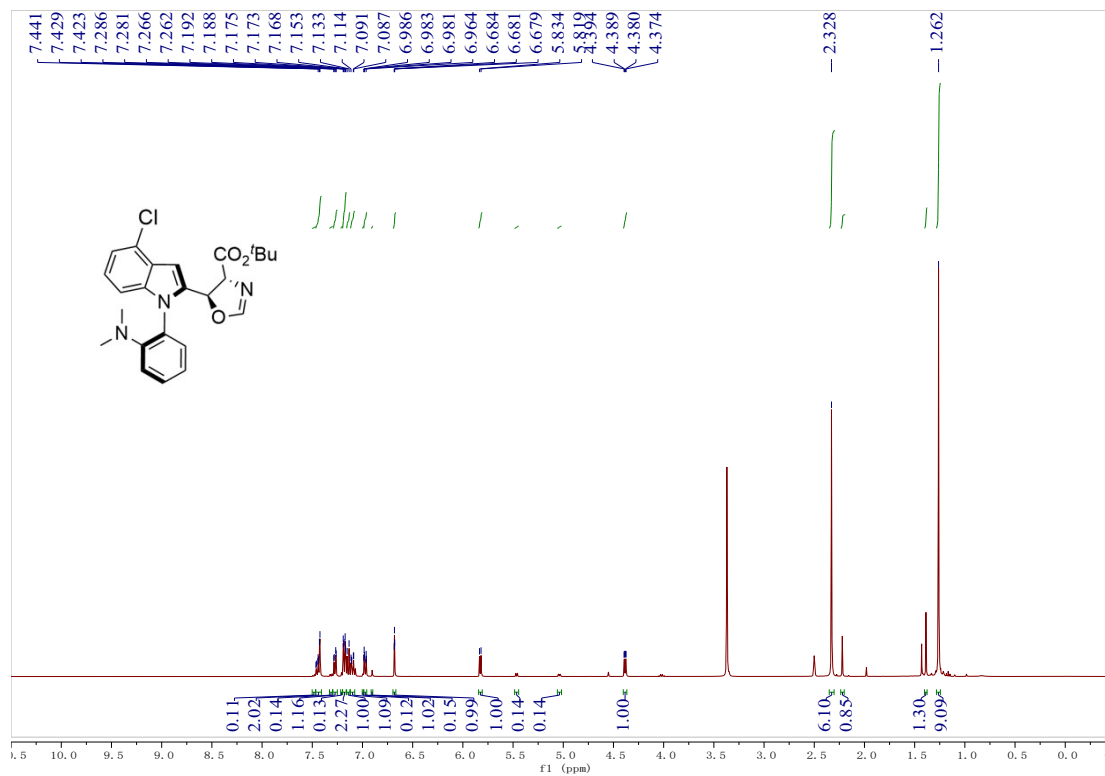

**<sup>13</sup>C NMR of 3ia (100 MHz, DMSO-d<sub>6</sub>)**

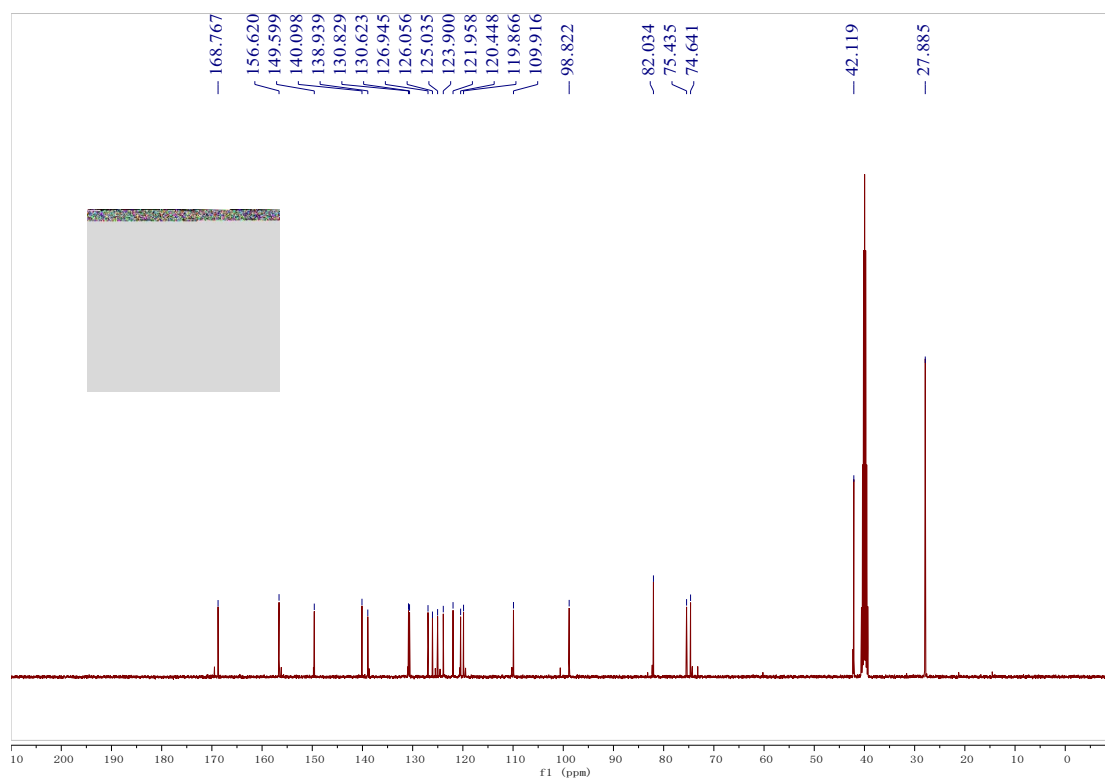

**<sup>1</sup>H NMR of 3ja (400 MHz, DMSO-d<sub>6</sub>)**

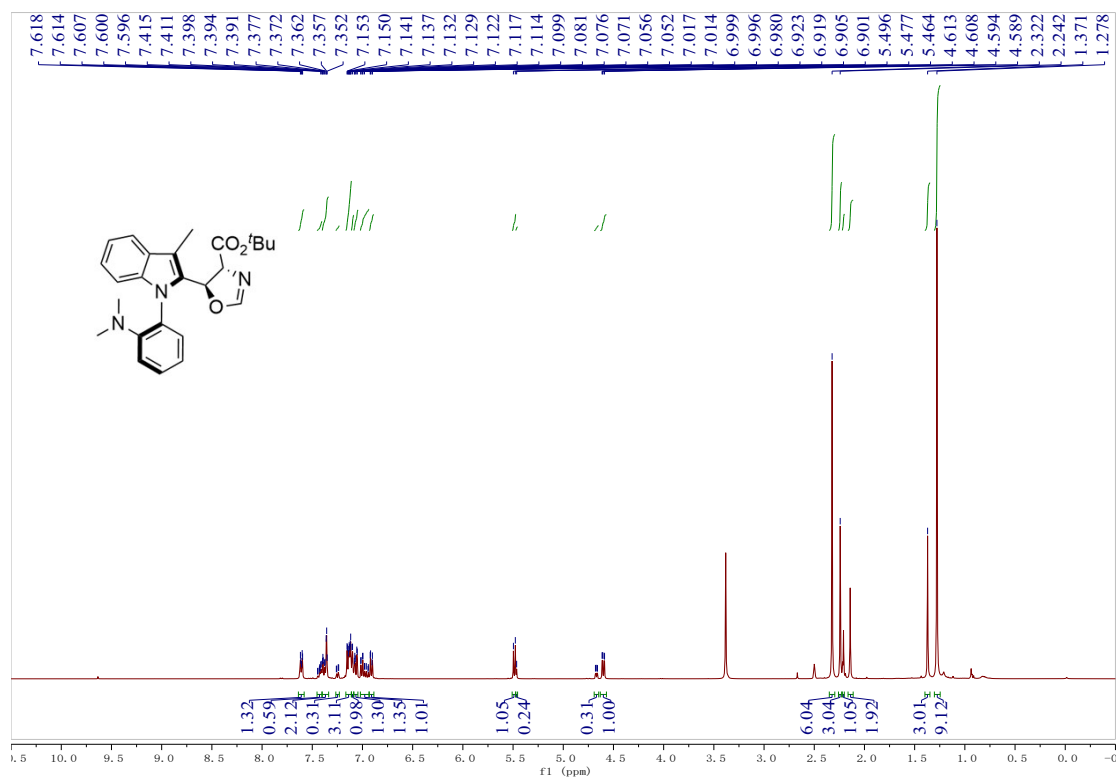

**<sup>13</sup>C NMR of 3ja (100 MHz, DMSO-d<sub>6</sub>)**

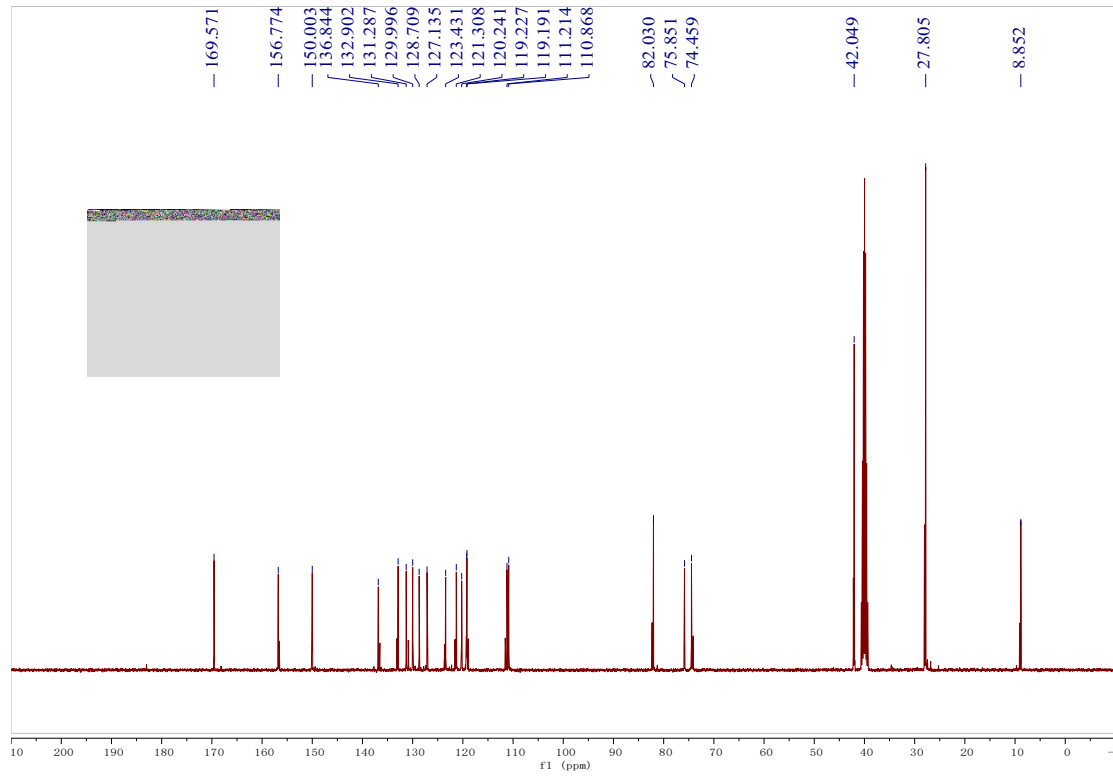

**<sup>1</sup>H NMR of 3ka (400 MHz, DMSO-d<sub>6</sub>)**

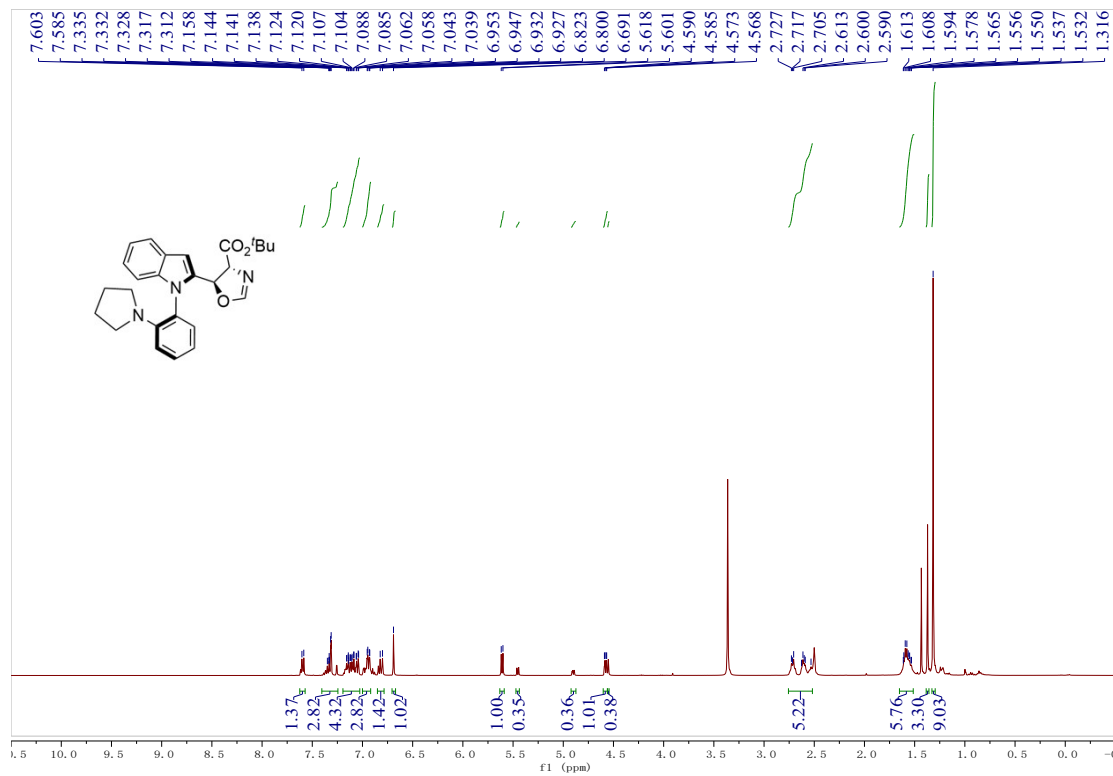

**<sup>13</sup>C NMR of 3ka (100 MHz, DMSO-d<sub>6</sub>)**

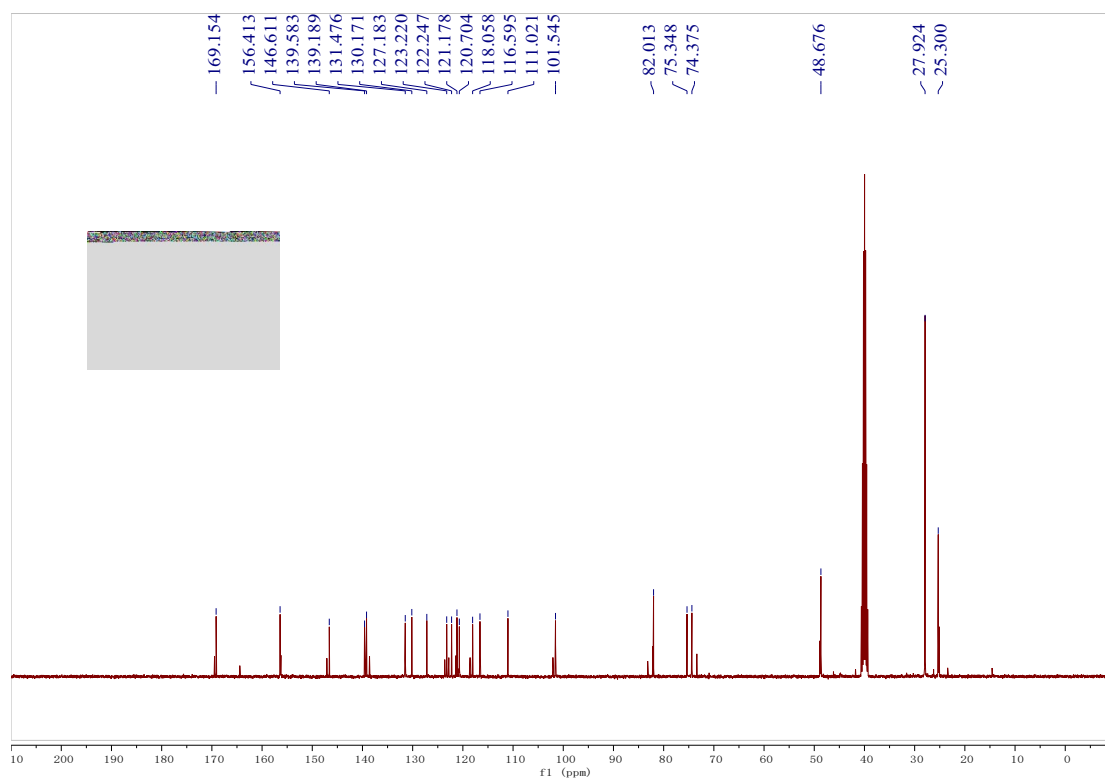

**<sup>1</sup>H NMR of 3la (400 MHz, DMSO-d<sub>6</sub>)**

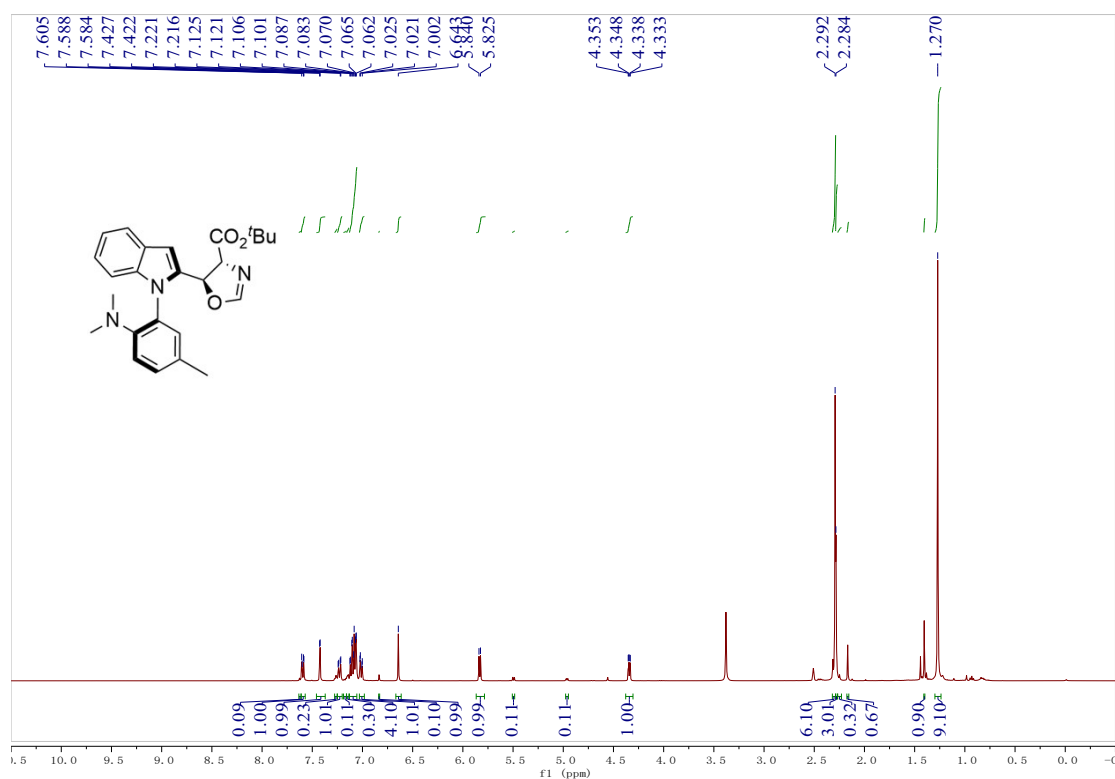

**<sup>13</sup>C NMR of 3la (100 MHz, DMSO-d<sub>6</sub>)**

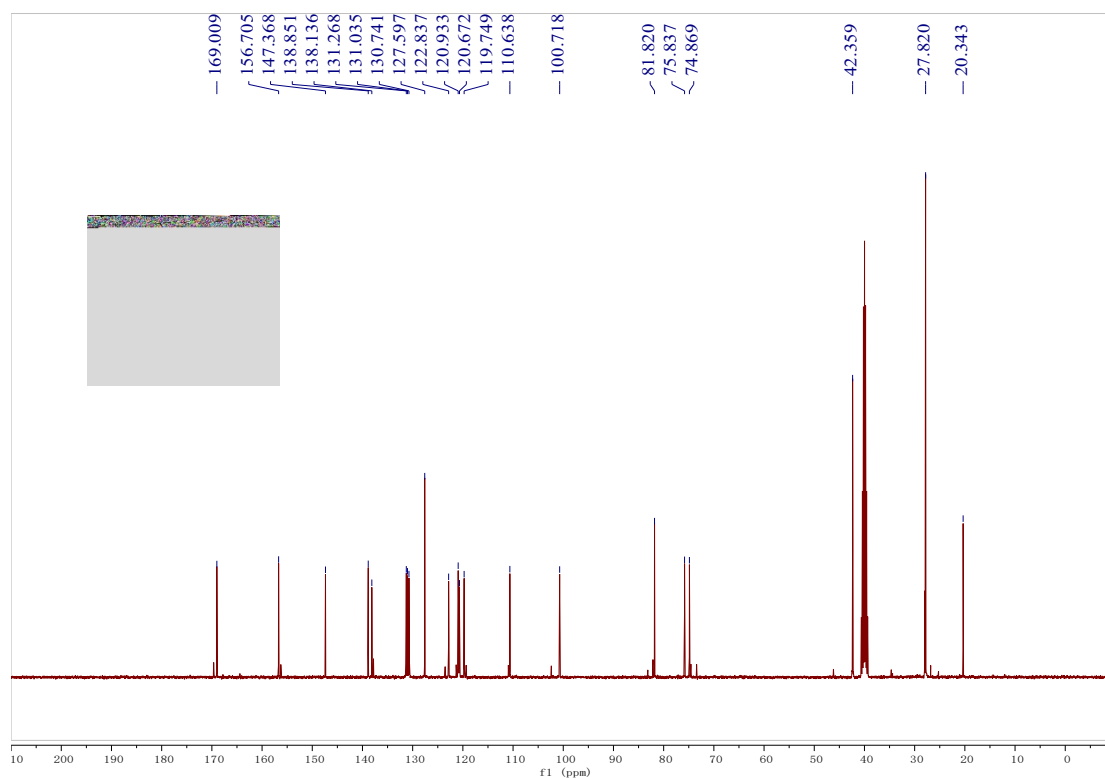

**<sup>1</sup>H NMR of 3ma (400 MHz, DMSO-d<sub>6</sub>)**

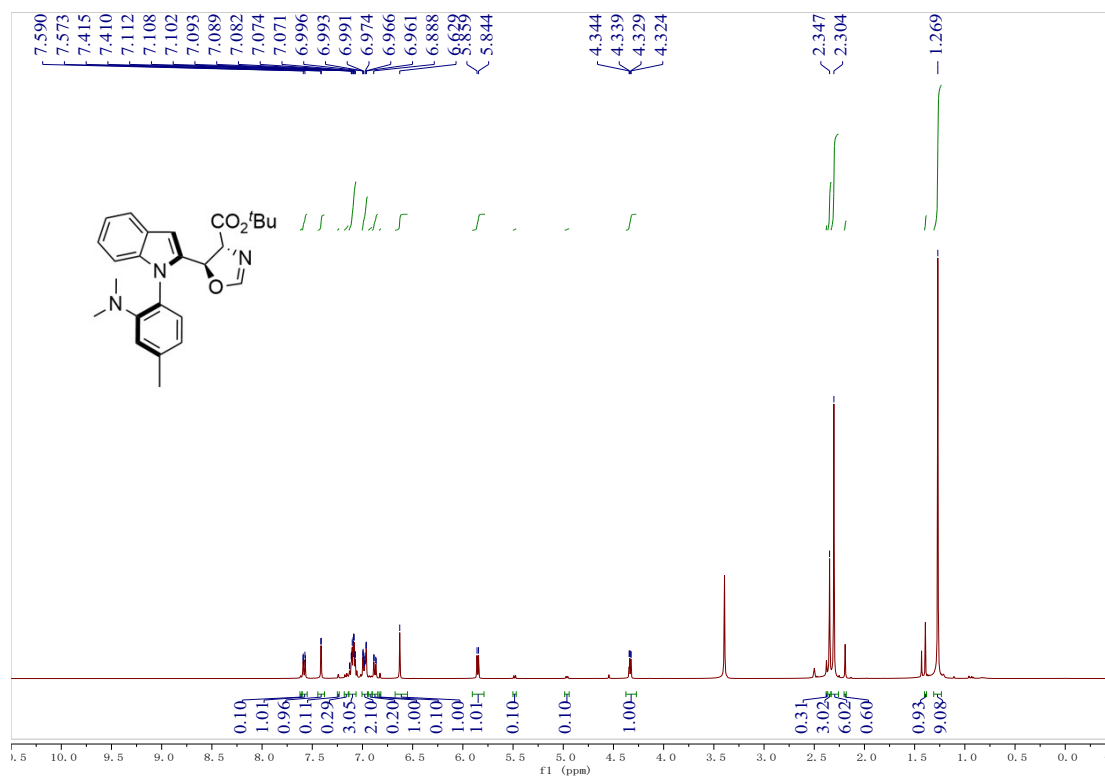

**<sup>13</sup>C NMR of 3ma (100 MHz, DMSO-d<sub>6</sub>)**

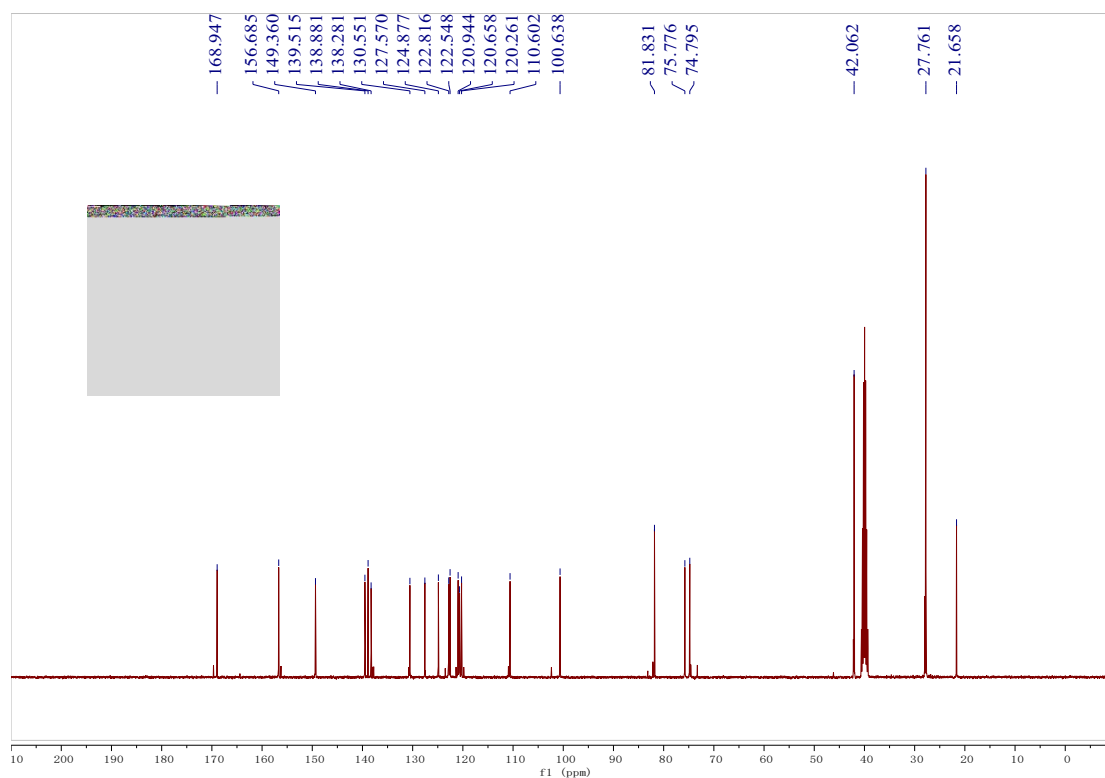

**<sup>1</sup>H NMR of 3ab (400 MHz, DMSO-d<sub>6</sub>)**

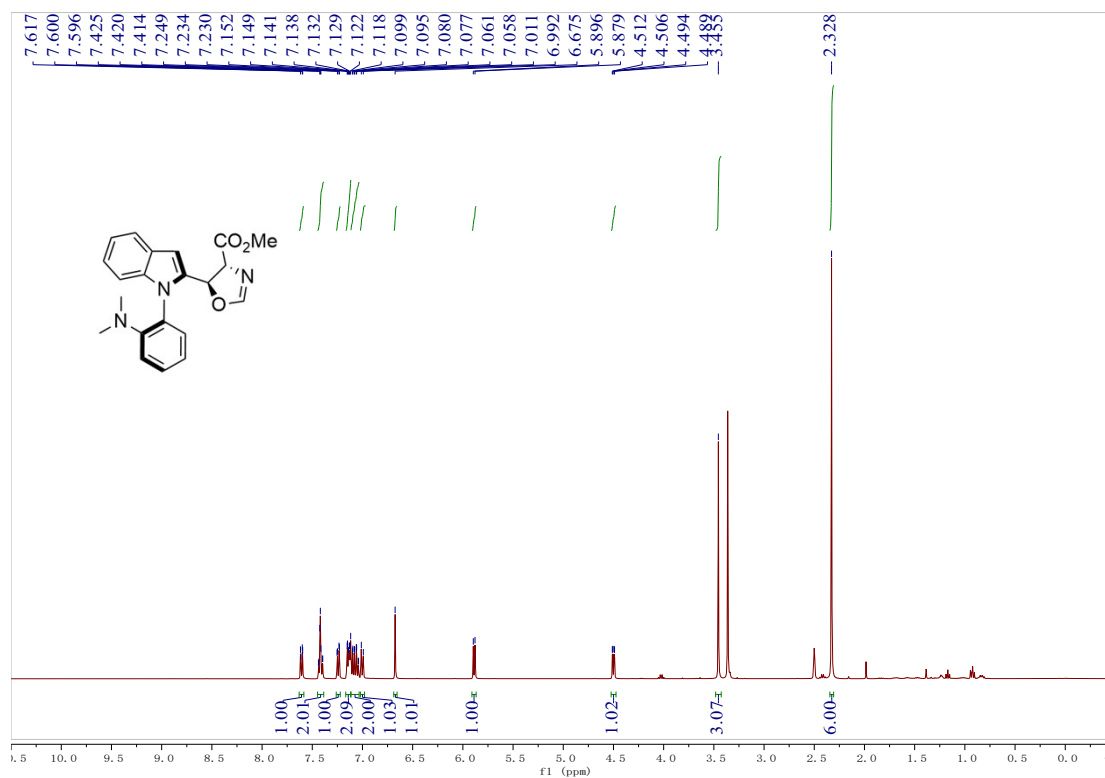

**<sup>13</sup>C NMR of 3ab (100 MHz, DMSO-d<sub>6</sub>)**

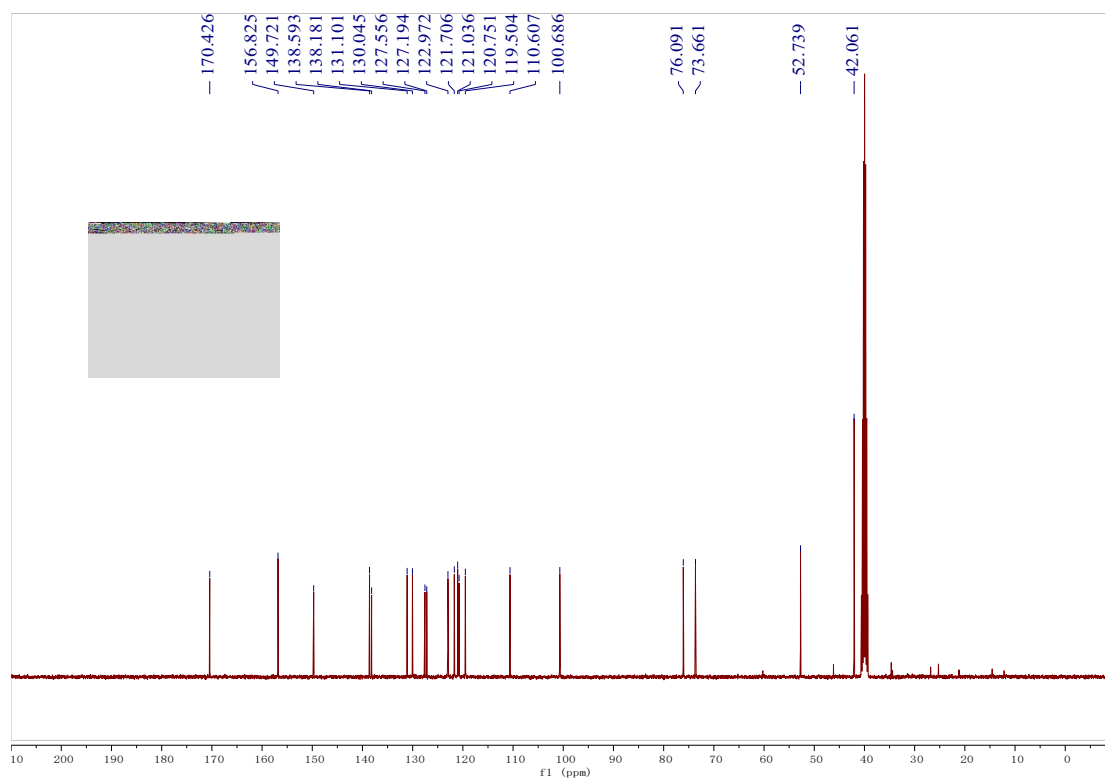

**<sup>1</sup>H NMR of 3ac (400 MHz, DMSO-d<sub>6</sub>)**

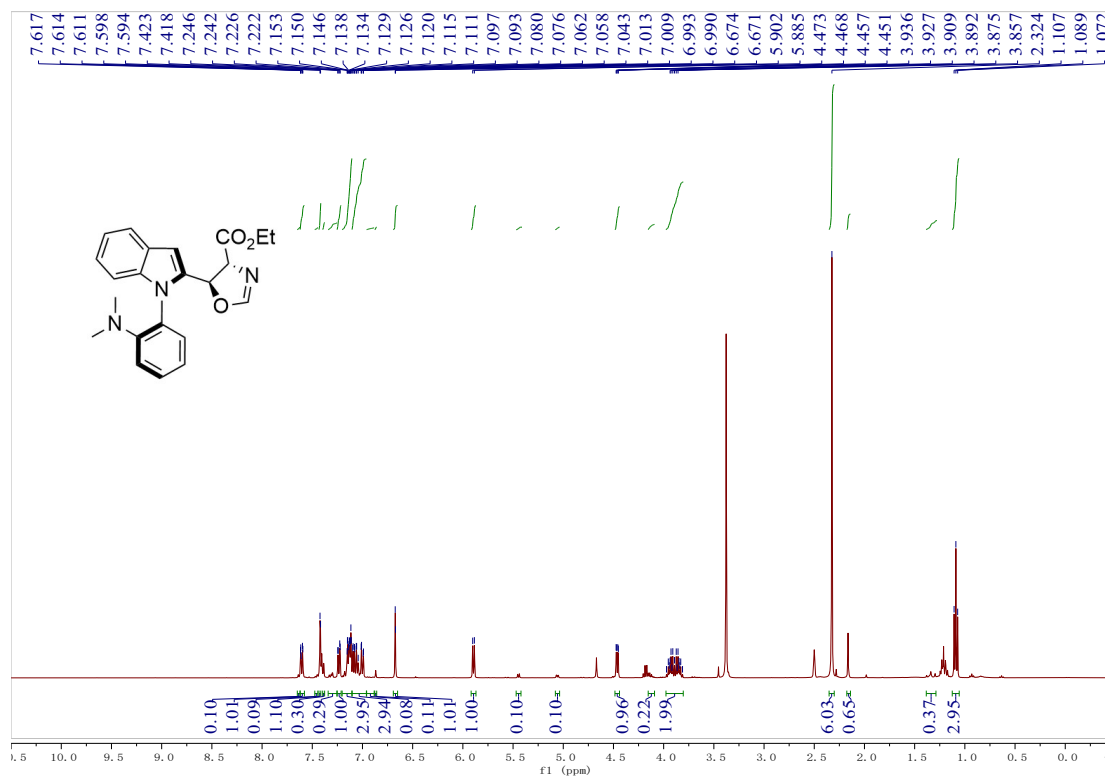

**<sup>13</sup>C NMR of 3ac (100 MHz, DMSO-d<sub>6</sub>)**

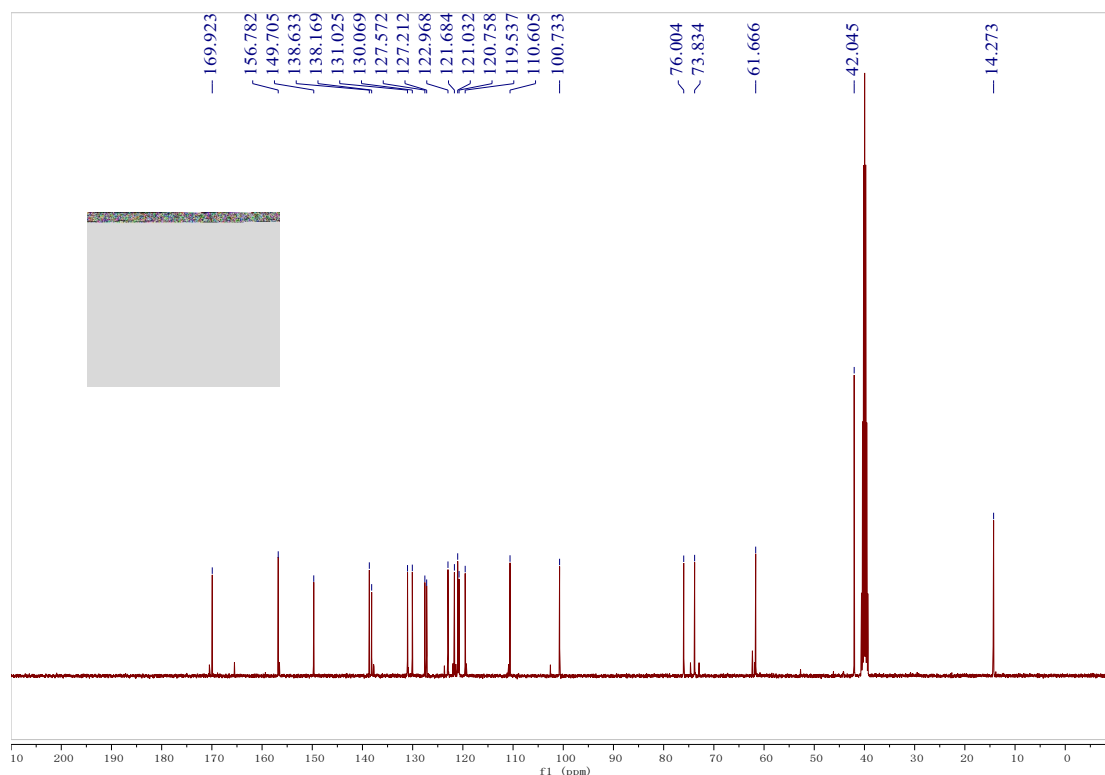

**<sup>1</sup>H NMR of 3ad (400 MHz, DMSO-d<sub>6</sub>)**

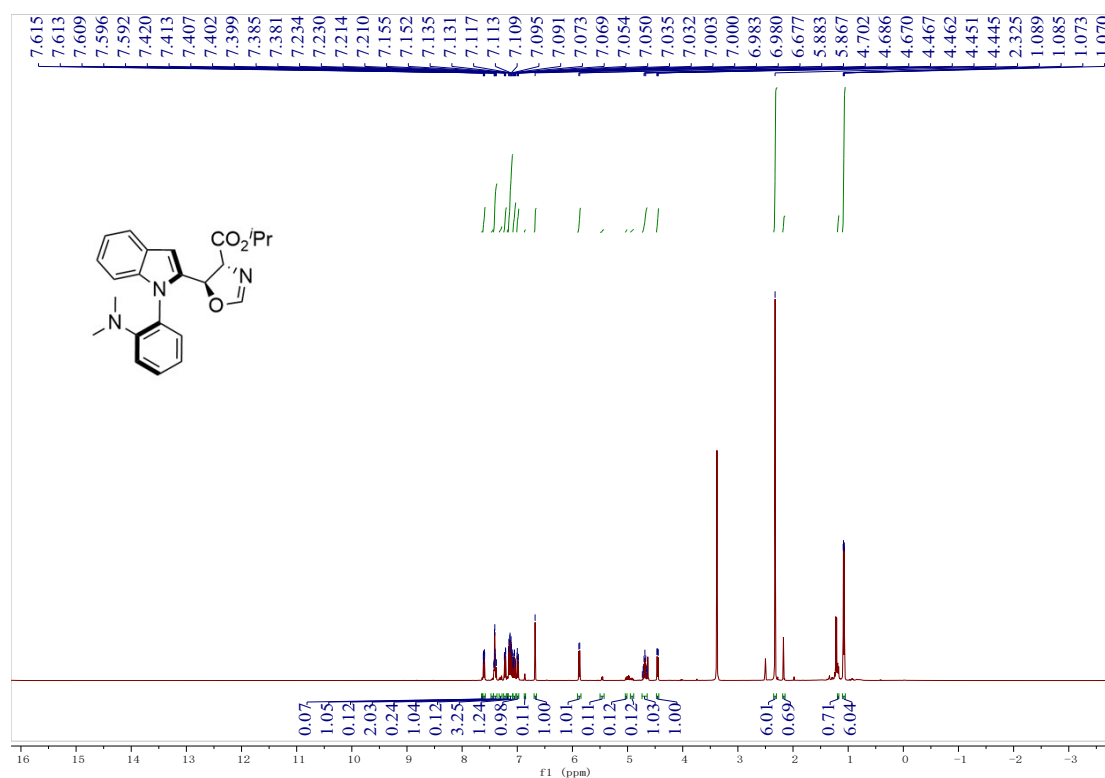

**<sup>13</sup>C NMR of 3ad (100 MHz, DMSO-d<sub>6</sub>)**

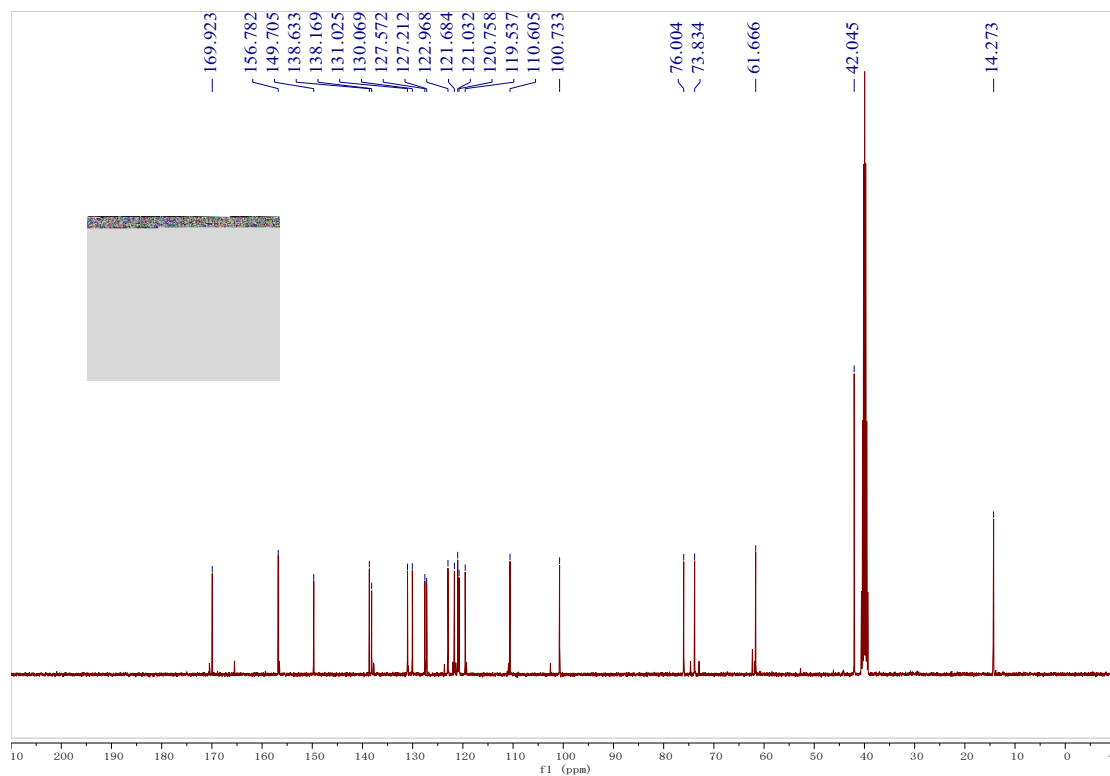

**<sup>1</sup>H NMR of 3ae (400 MHz, DMSO-d<sub>6</sub>)**

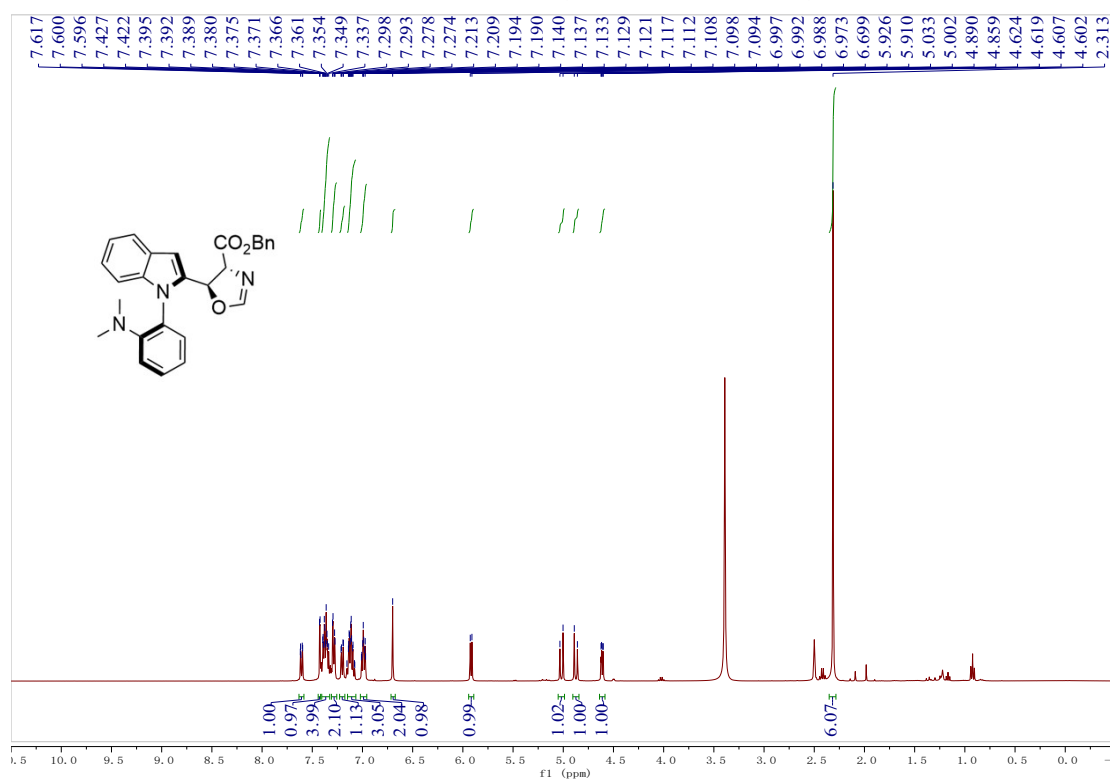

**<sup>13</sup>C NMR of 3ae (100 MHz, DMSO-*d*<sub>6</sub>)**

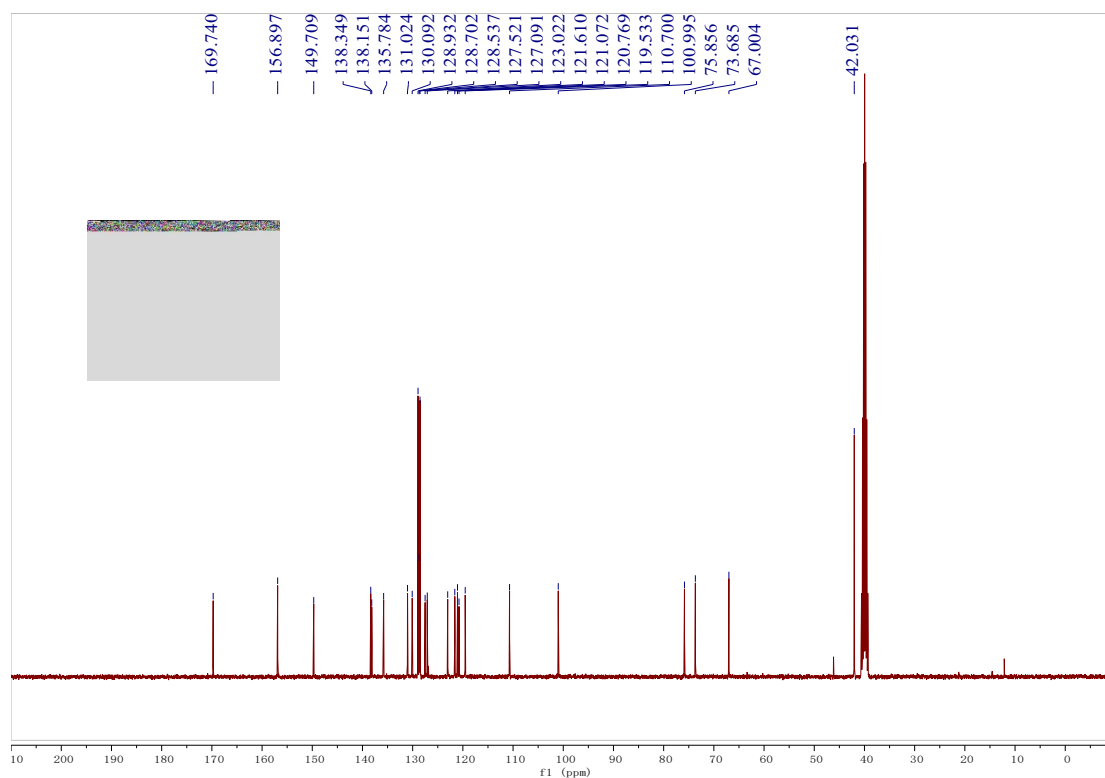

**<sup>1</sup>H NMR of 3af (400 MHz, DMSO-*d*<sub>6</sub>)**

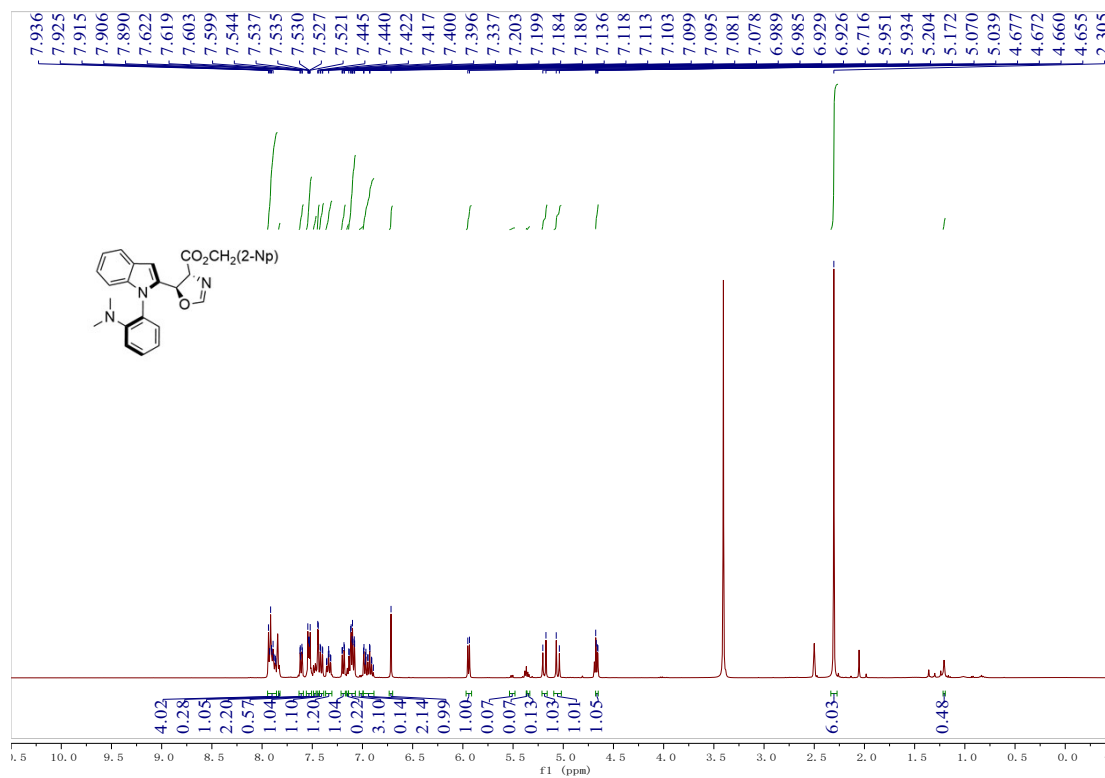

**<sup>13</sup>C NMR of 3af (100 MHz, DMSO-d<sub>6</sub>)**

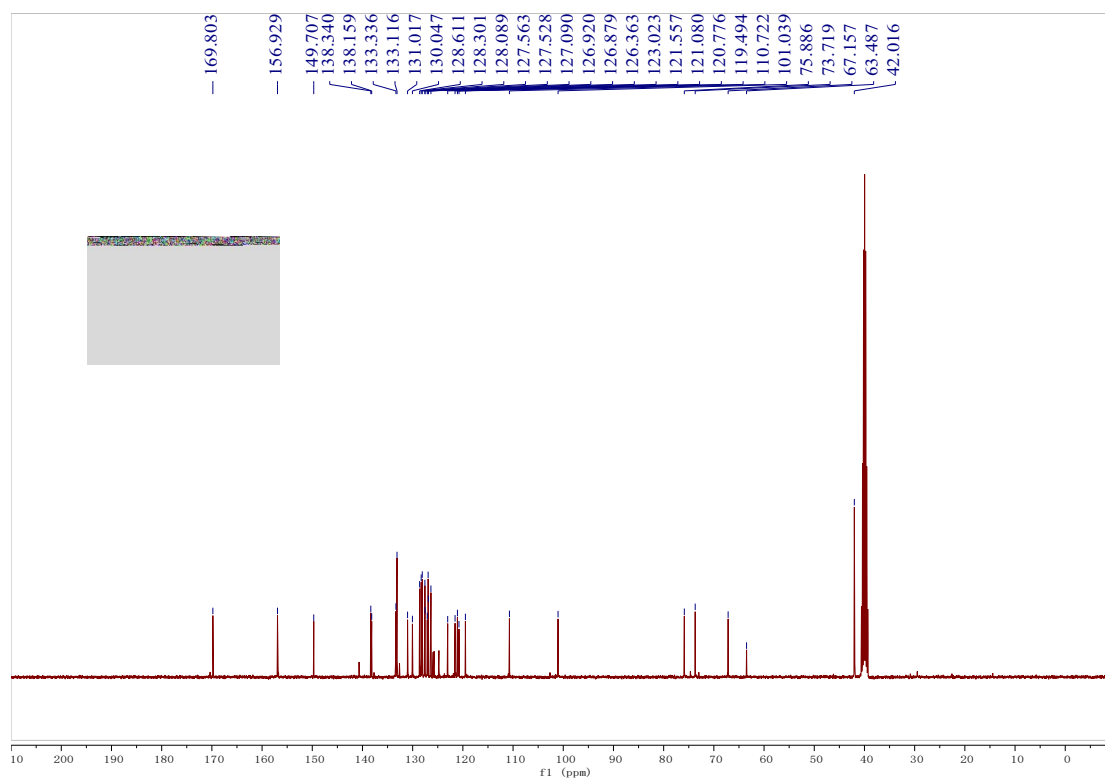

**<sup>1</sup>H NMR of 5aa (400 MHz, DMSO-d<sub>6</sub>)**

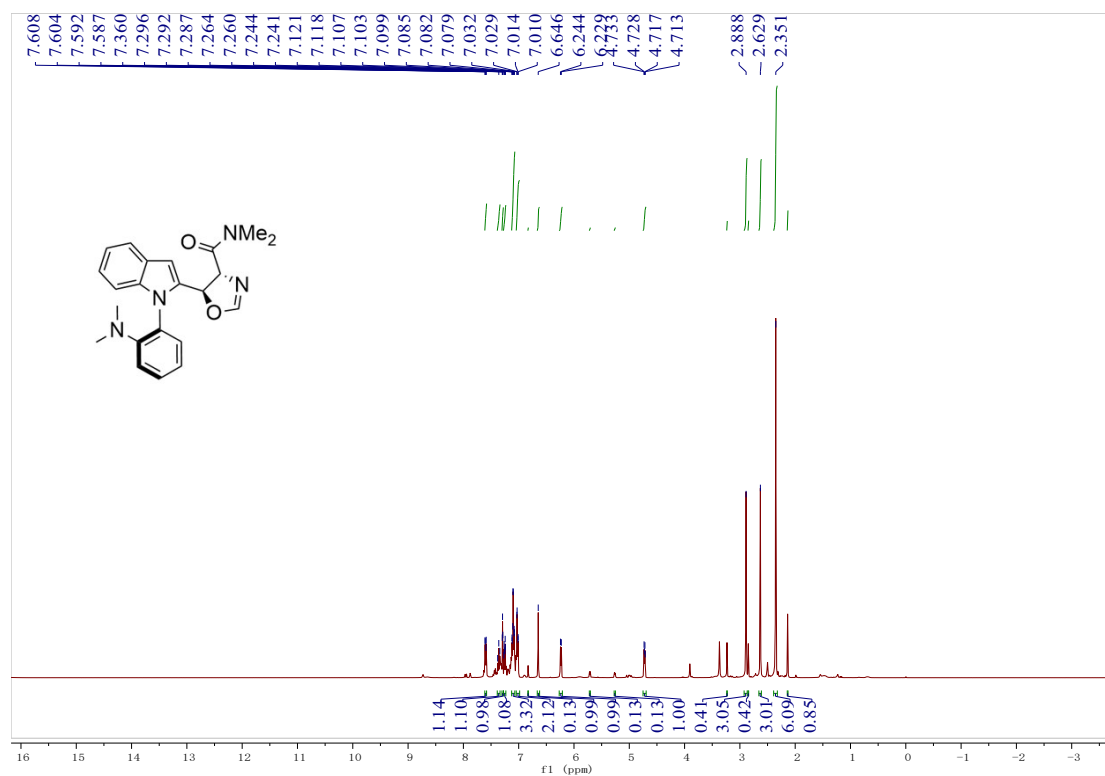

**<sup>13</sup>C NMR of 5aa (100 MHz, DMSO-d<sub>6</sub>)**

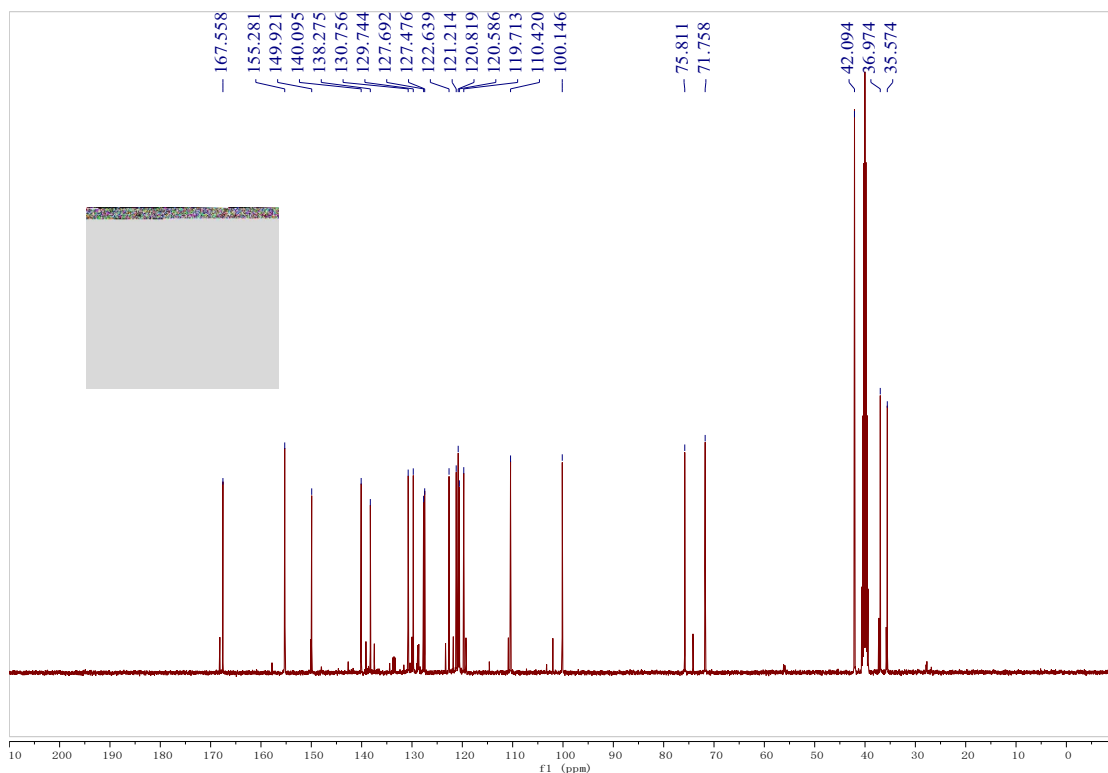

**<sup>1</sup>H NMR of 5ab (400 MHz, DMSO-d<sub>6</sub>)**

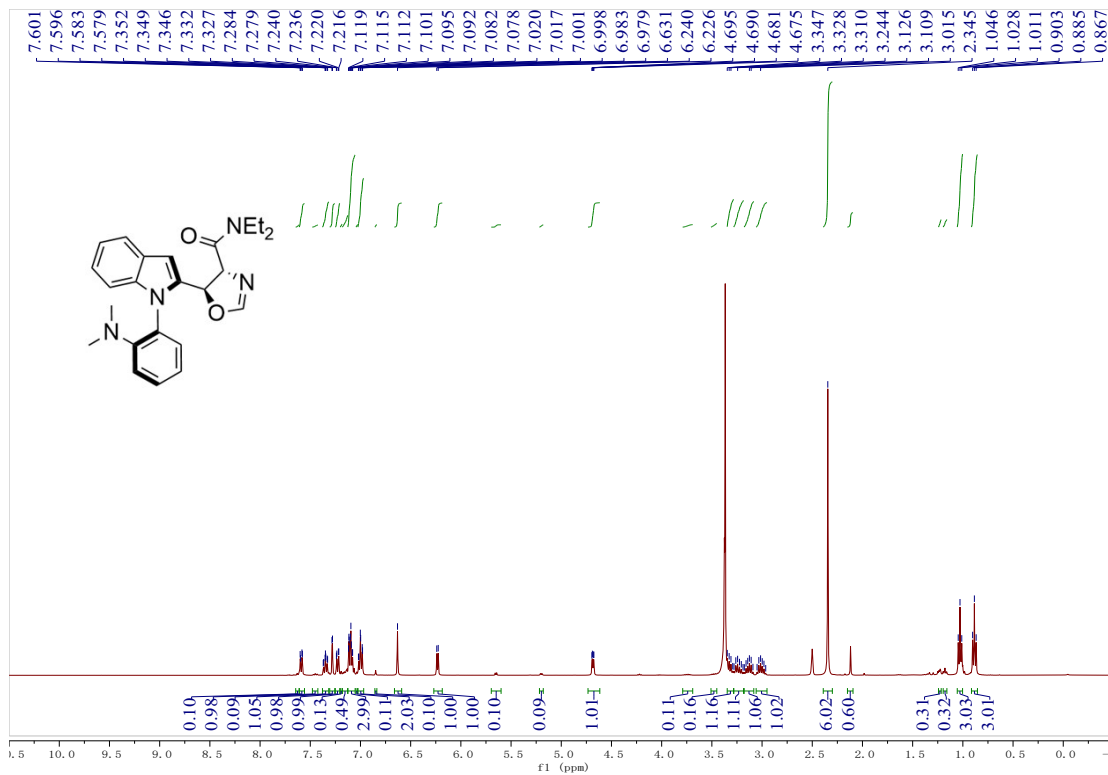

**<sup>13</sup>C NMR of 5ab (100 MHz, DMSO-d<sub>6</sub>)**

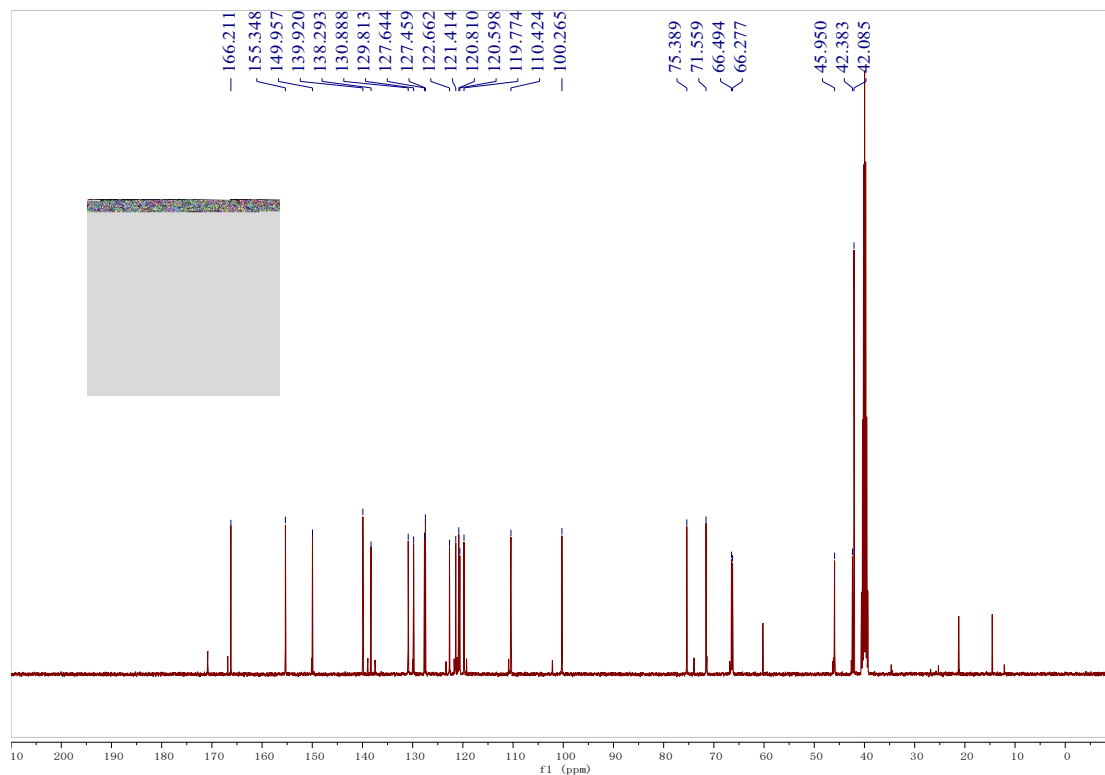

**<sup>1</sup>H NMR of 5ac (400 MHz, DMSO-d<sub>6</sub>)**

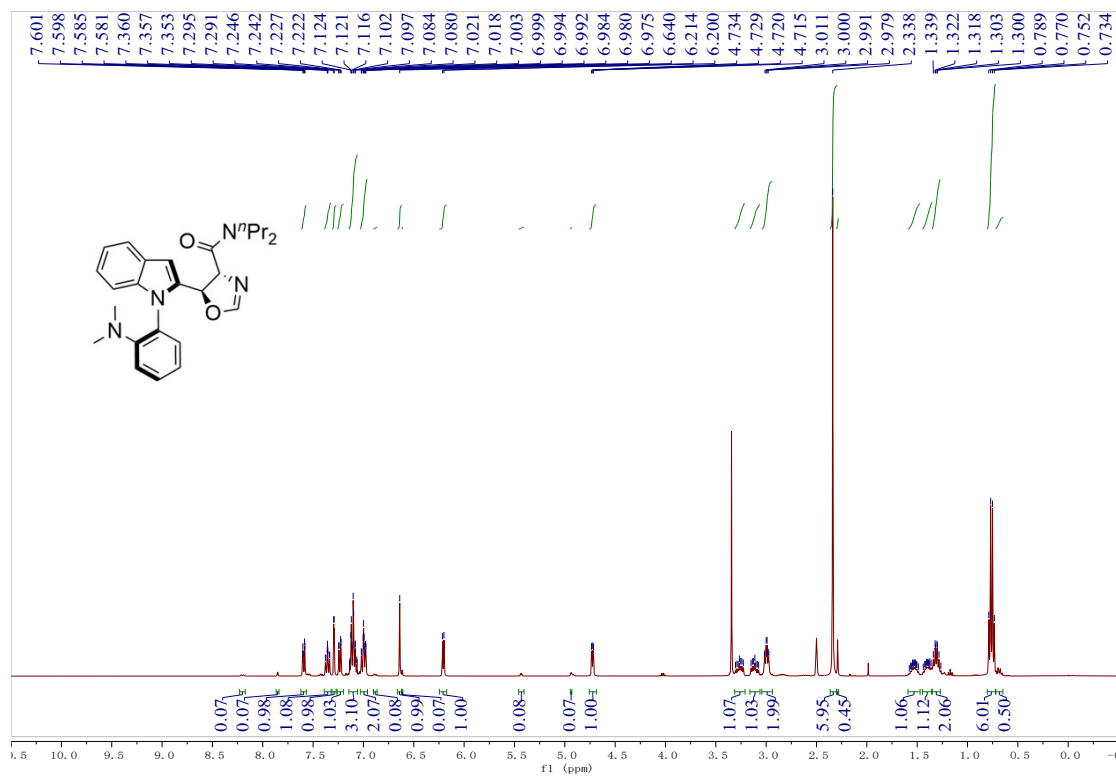

### <sup>13</sup>C NMR of 5ac (100 MHz, DMSO-d<sub>6</sub>)

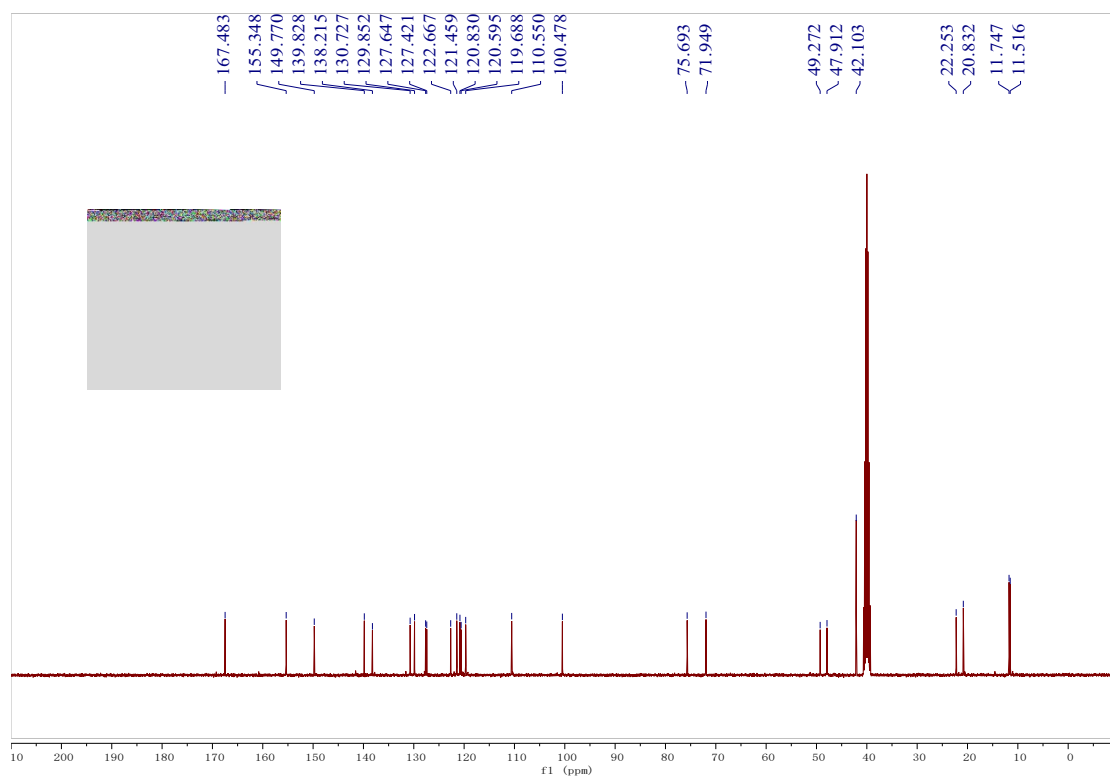

### <sup>1</sup>H NMR of 5ad (400 MHz, DMSO-d<sub>6</sub>)

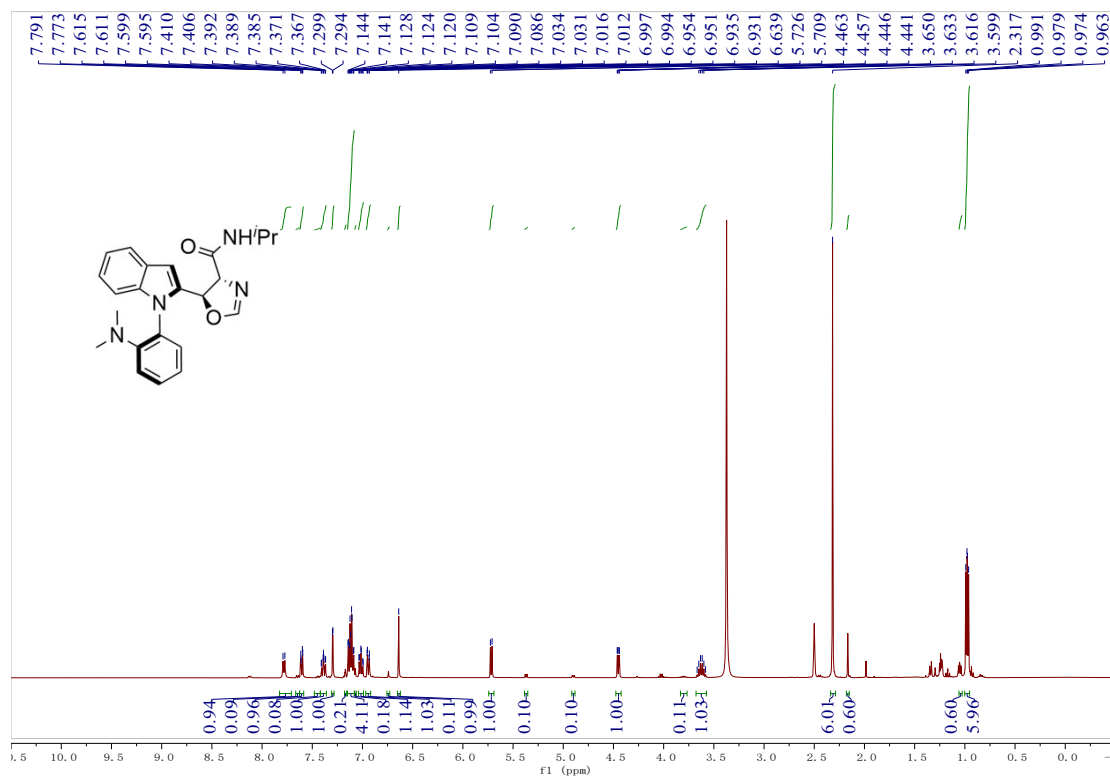

**<sup>13</sup>C NMR of 5ad (100 MHz, DMSO-d<sub>6</sub>)**

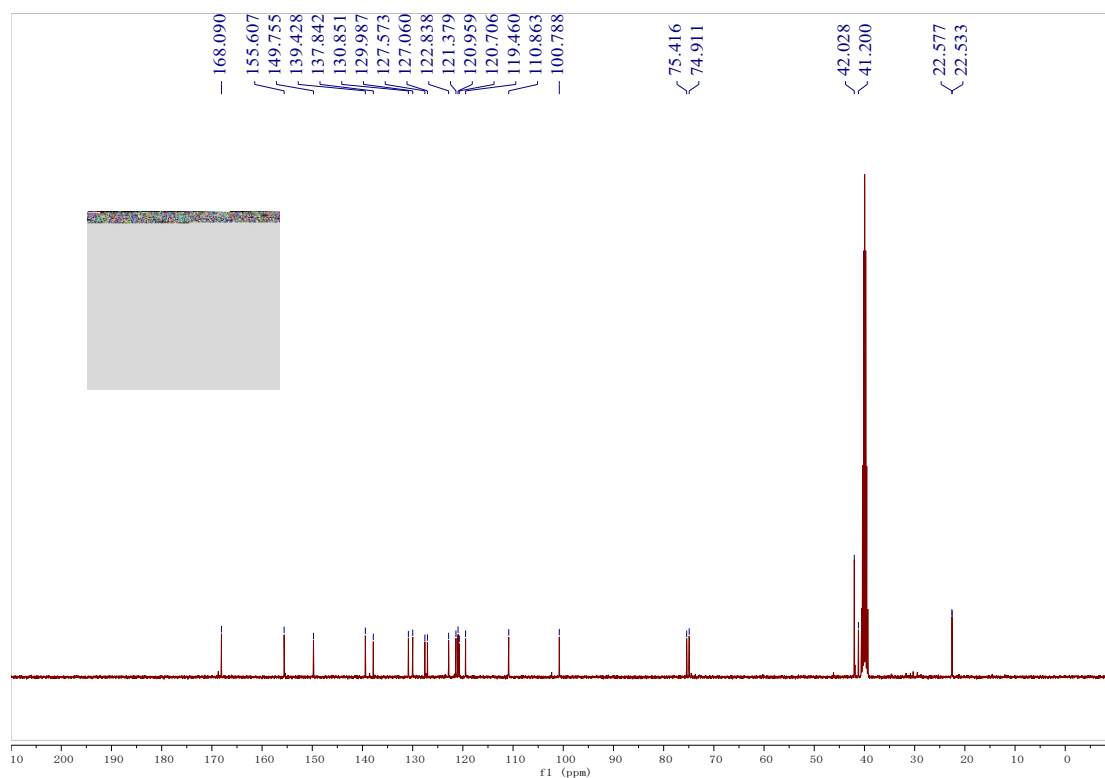

**<sup>1</sup>H NMR of 5ae (400 MHz, DMSO-d<sub>6</sub>)**

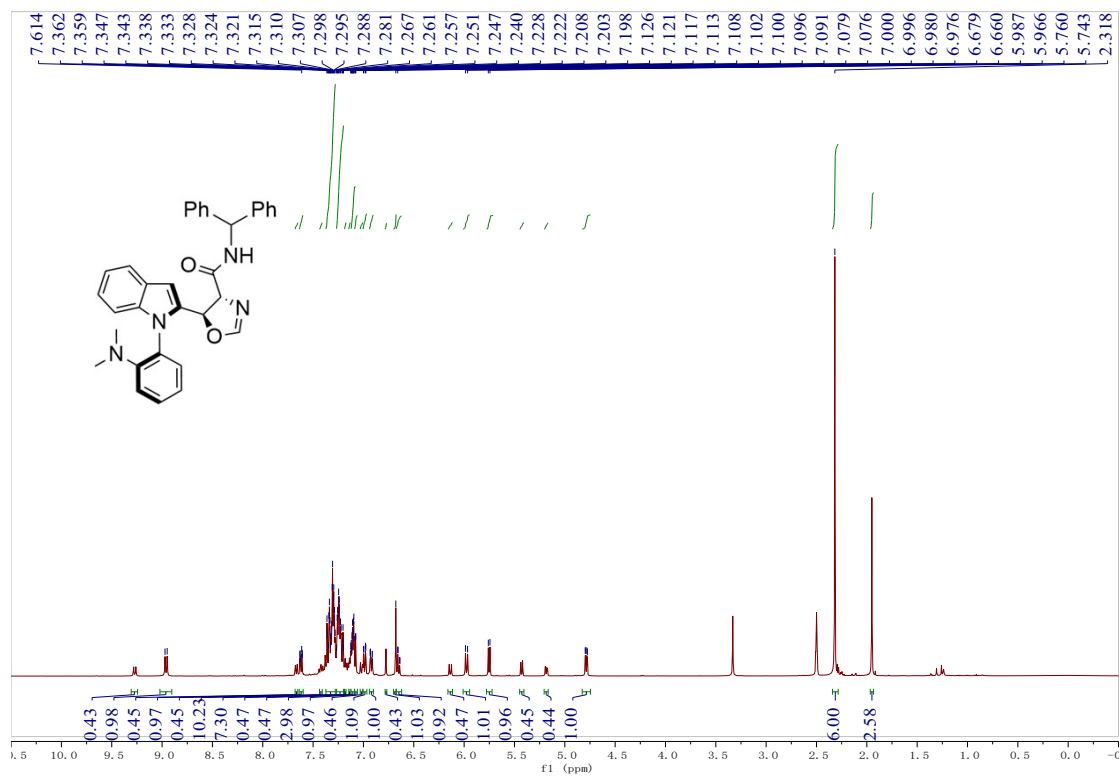

**<sup>13</sup>C NMR of 5ae (100 MHz, DMSO-d<sub>6</sub>)**

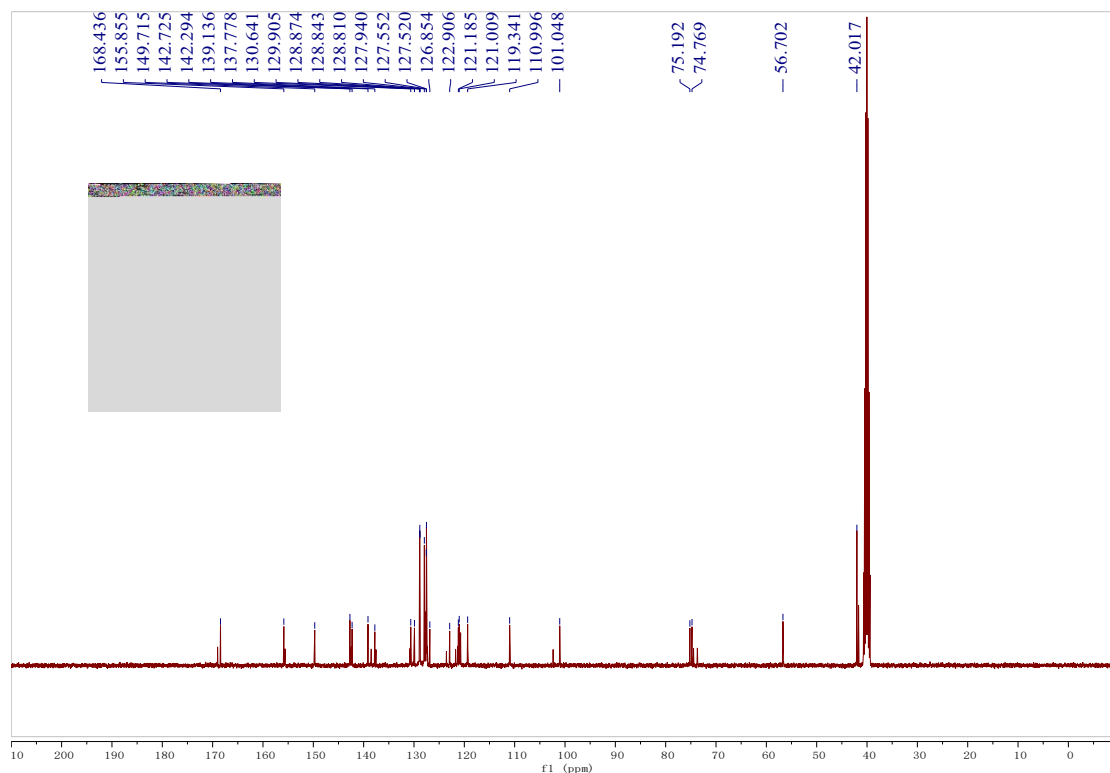

**<sup>1</sup>H NMR of 5af (400 MHz, DMSO-d<sub>6</sub>)**

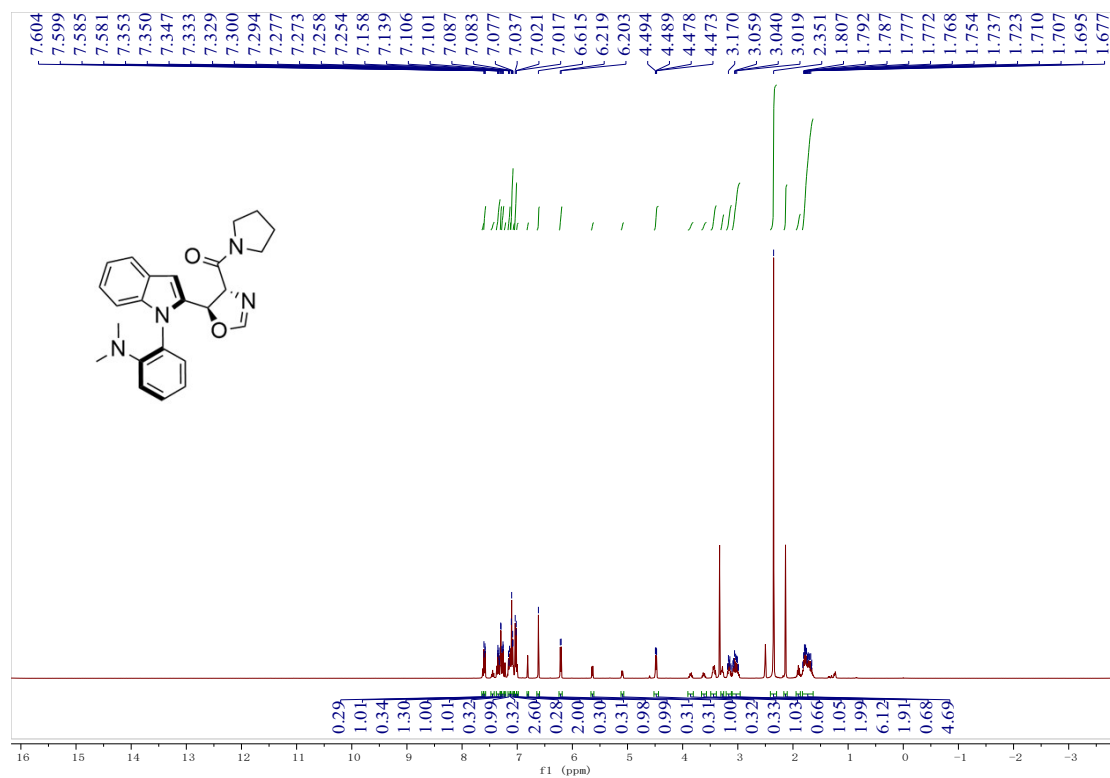

**<sup>13</sup>C NMR of 5af (100 MHz, DMSO-d<sub>6</sub>)**

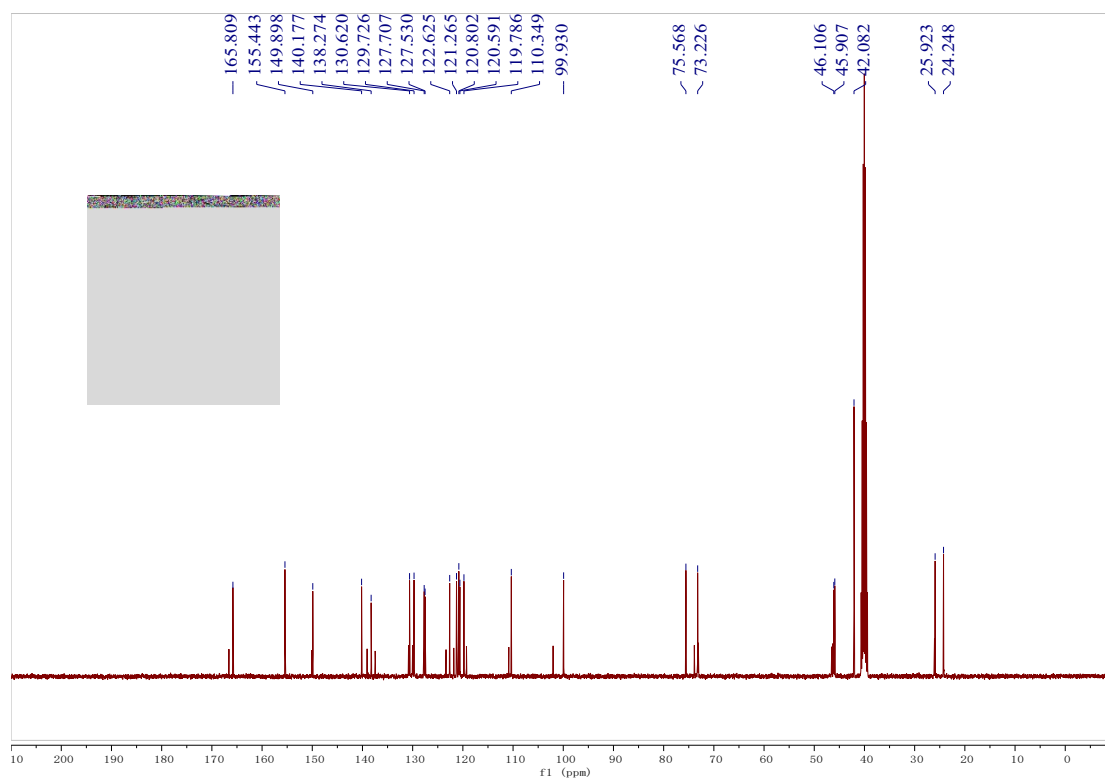

**<sup>1</sup>H NMR of 5ag (400 MHz, DMSO-d<sub>6</sub>)**

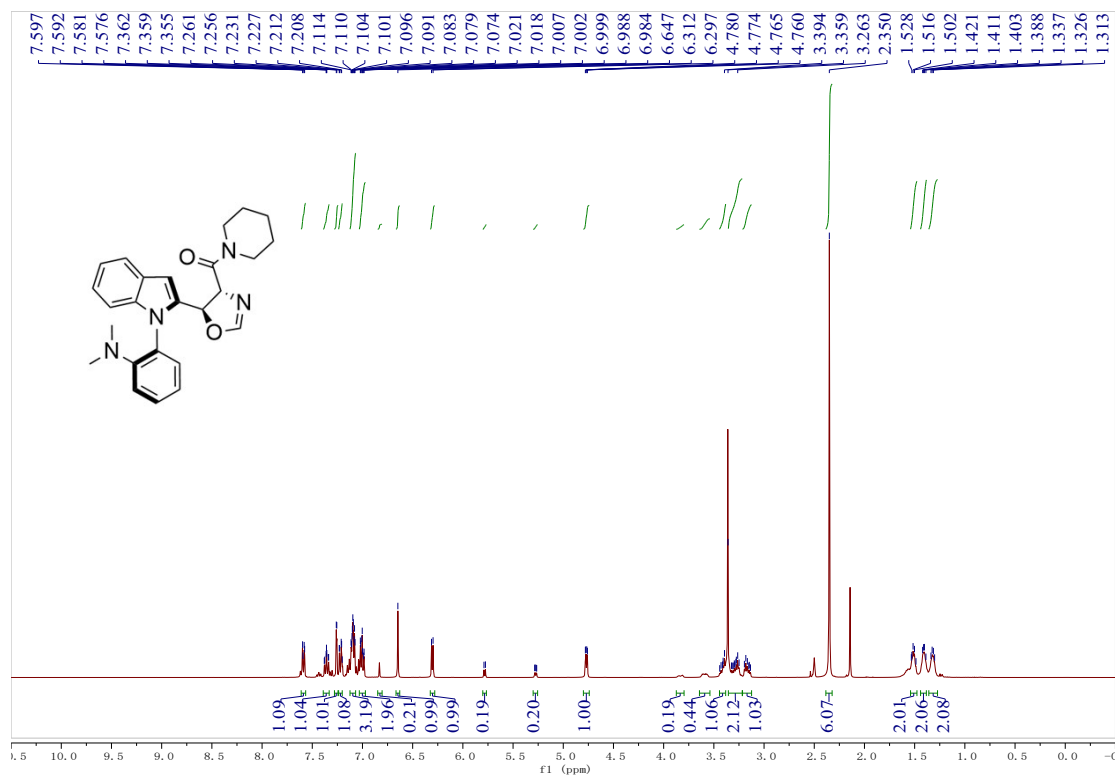

**<sup>13</sup>C NMR of 5ag (100 MHz, DMSO-d<sub>6</sub>)**

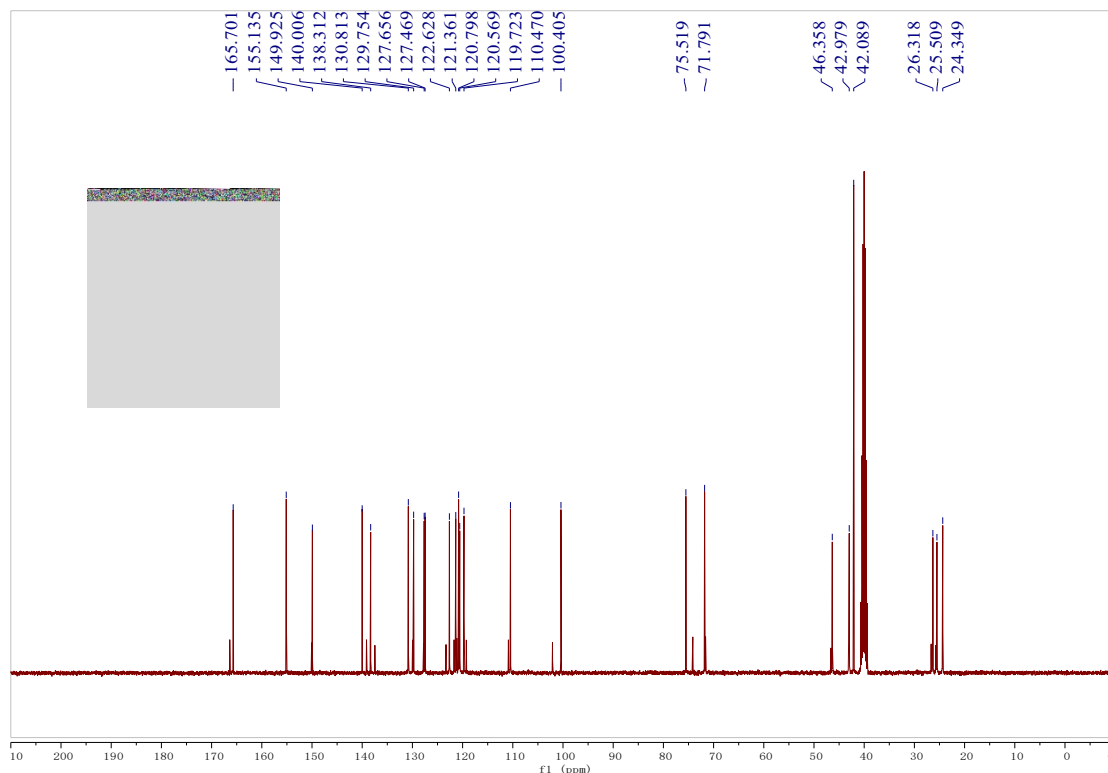

**<sup>1</sup>H NMR of 5ah (400 MHz, DMSO-d<sub>6</sub>)**

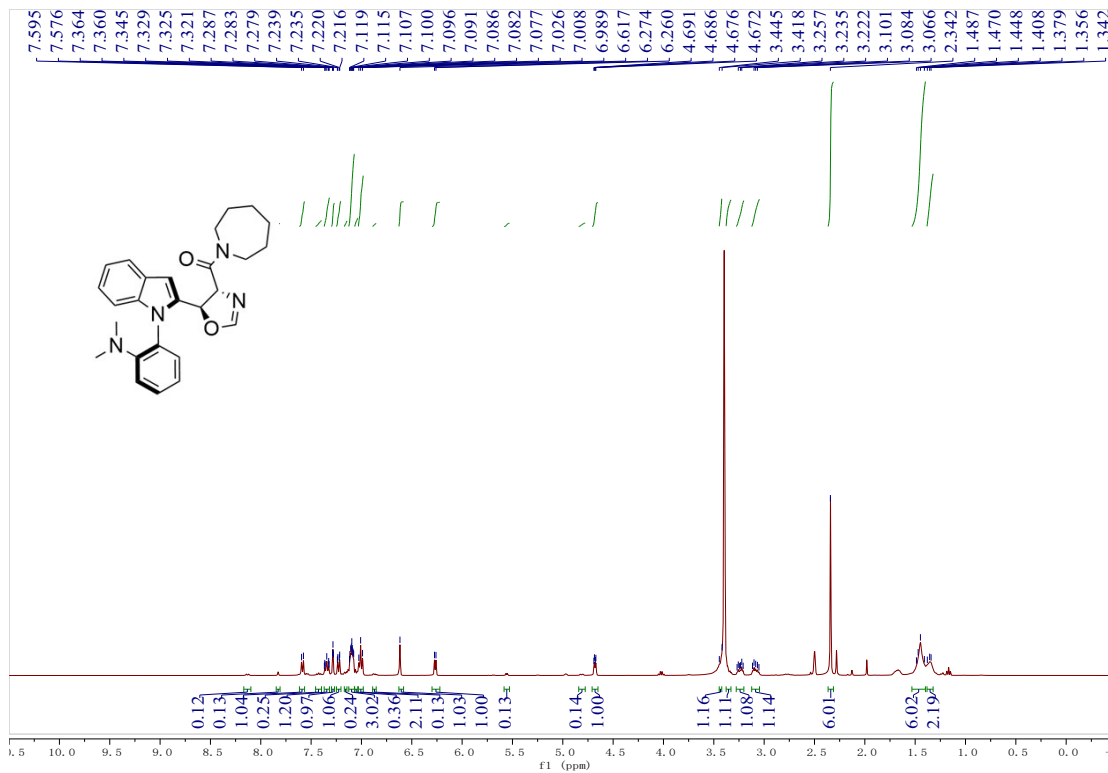

**<sup>13</sup>C NMR of 5ah (100 MHz, DMSO-d<sub>6</sub>)**

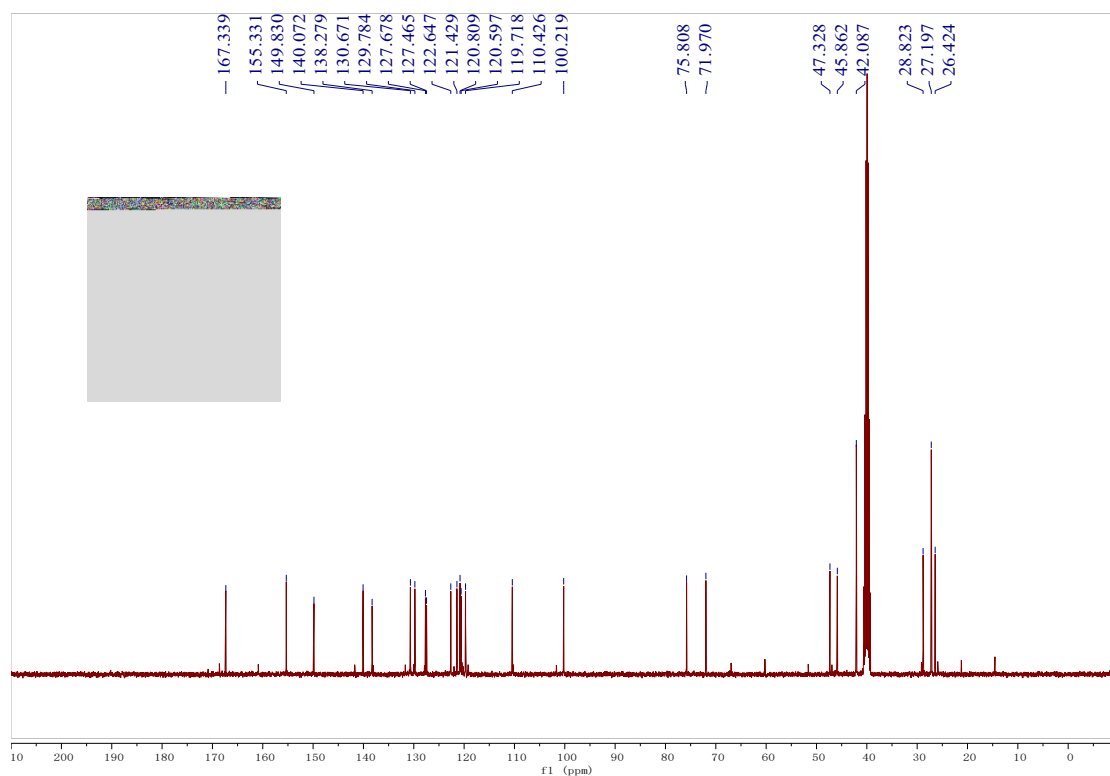

**<sup>1</sup>H NMR of 5ai (400 MHz, DMSO-d<sub>6</sub>)**

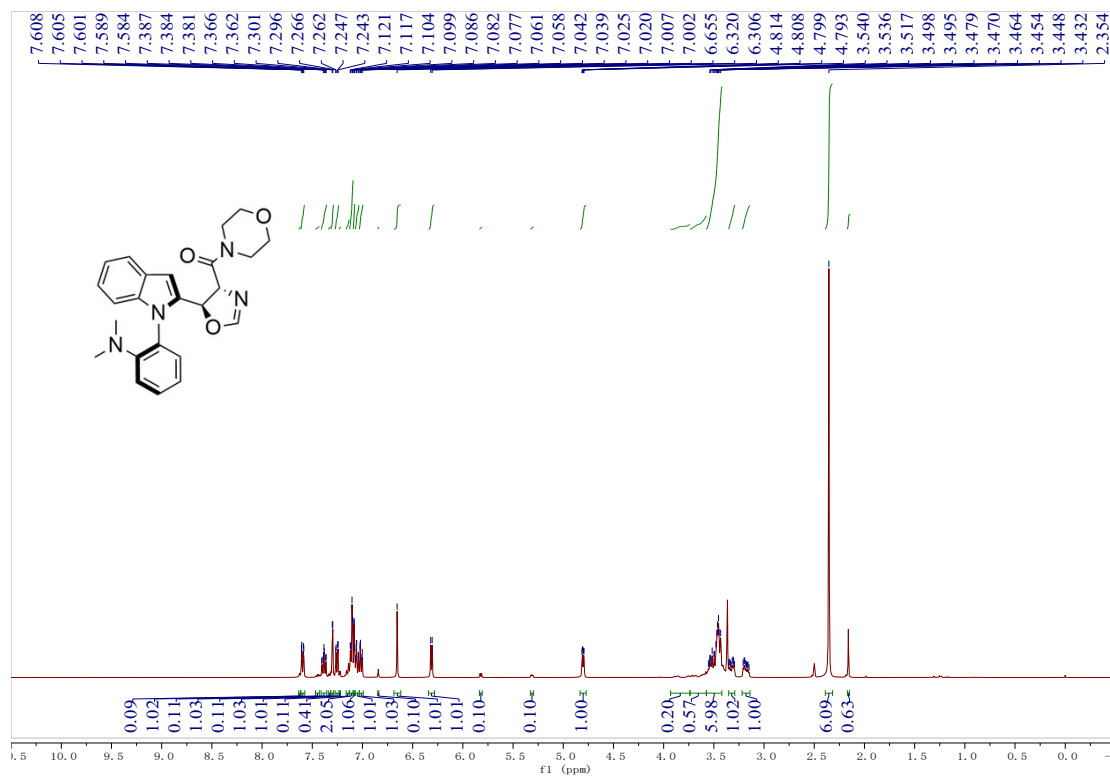

**<sup>13</sup>C NMR of 5ai (100 MHz, DMSO-d<sub>6</sub>)**

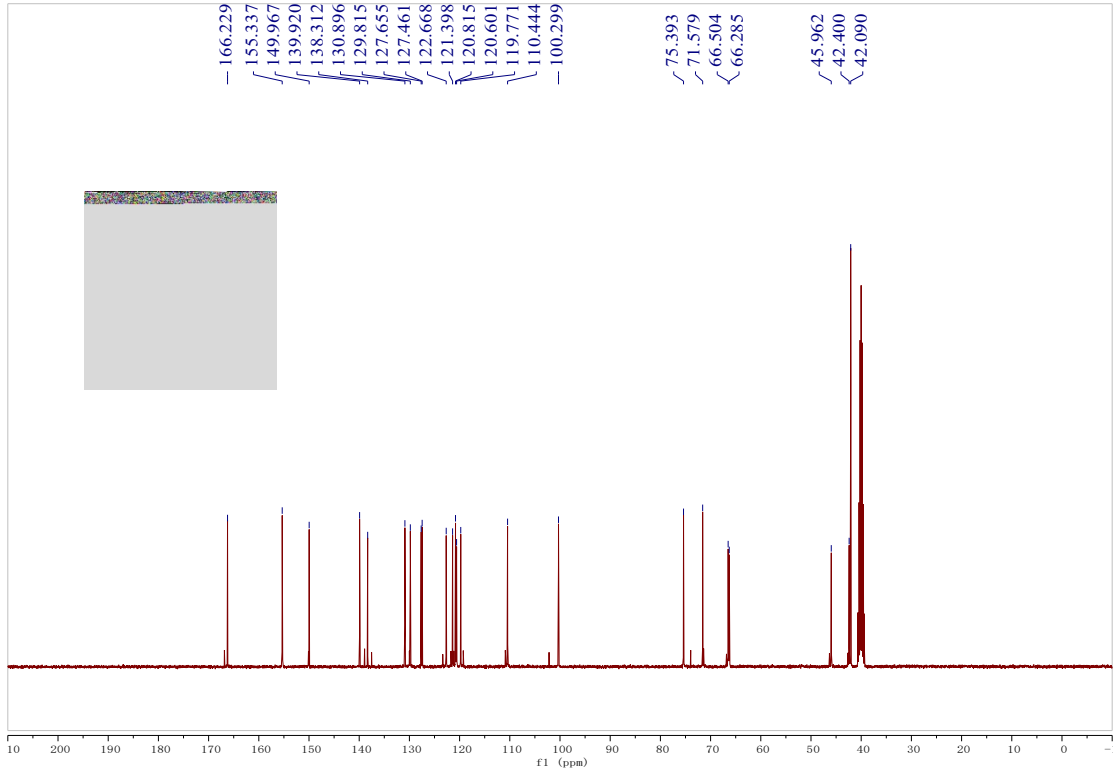

**<sup>1</sup>H NMR of 5aj (400 MHz, DMSO-d<sub>6</sub>)**

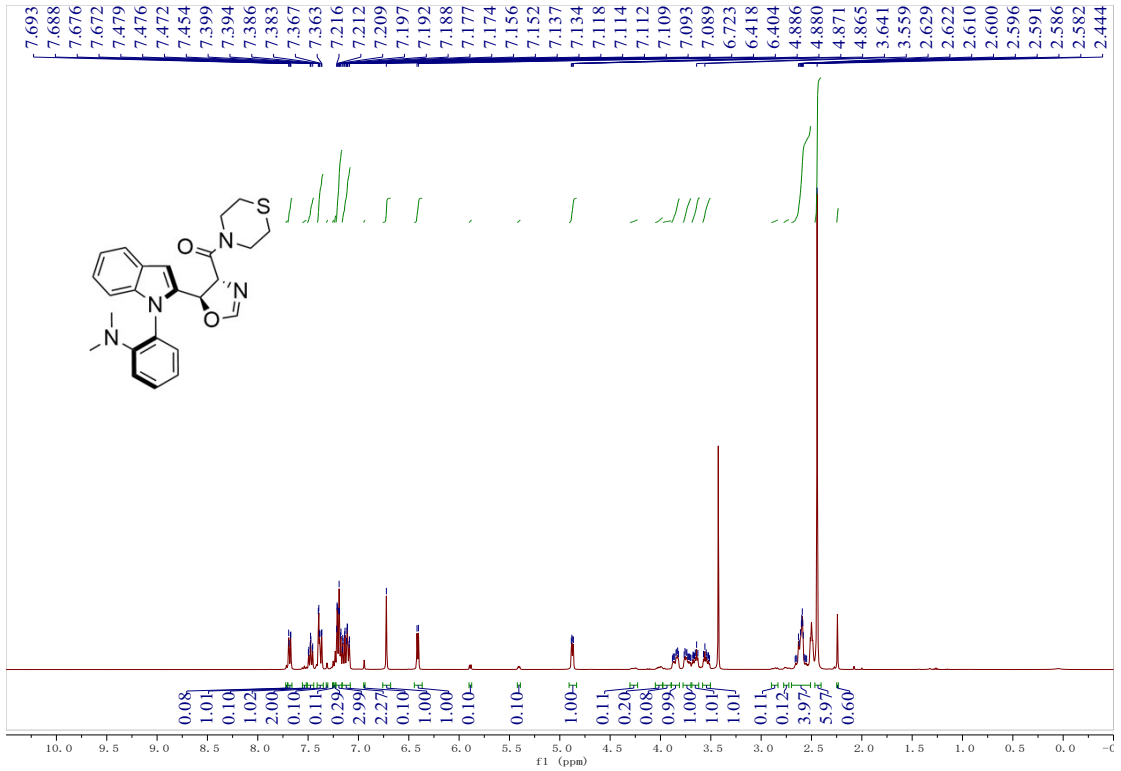

**<sup>13</sup>C NMR of 5aj (100 MHz, DMSO-d<sub>6</sub>)**

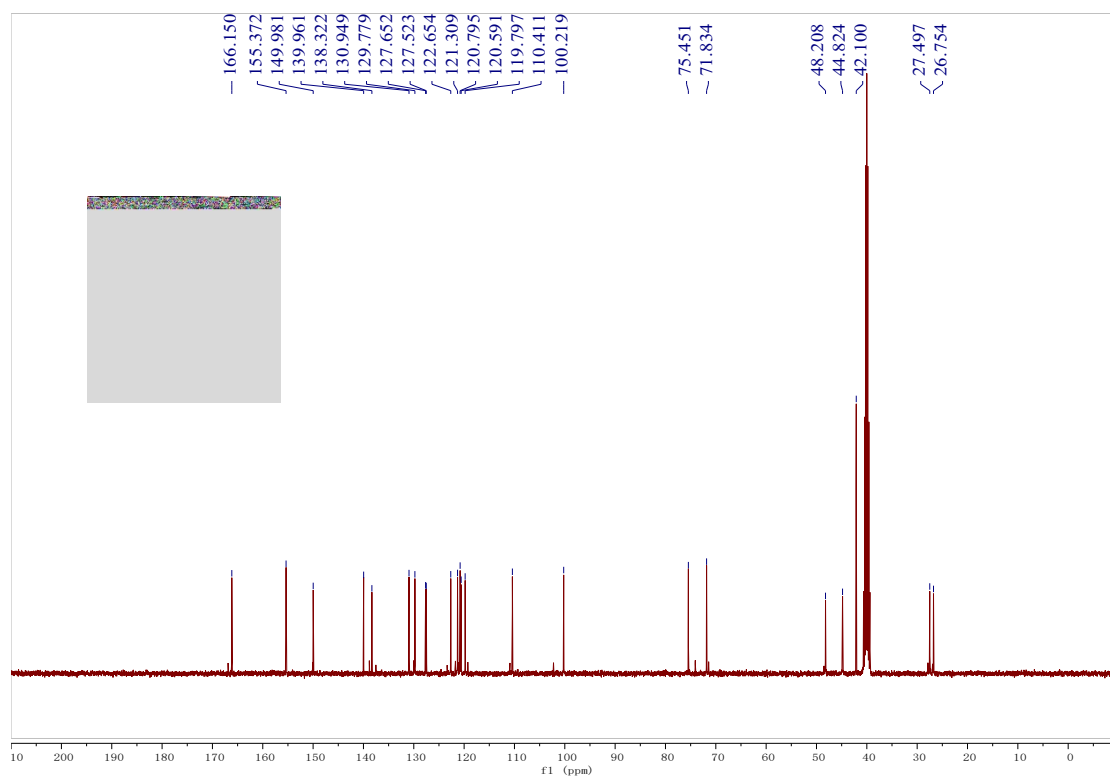

**<sup>1</sup>H NMR of 5ak (400 MHz, DMSO-d<sub>6</sub>)**

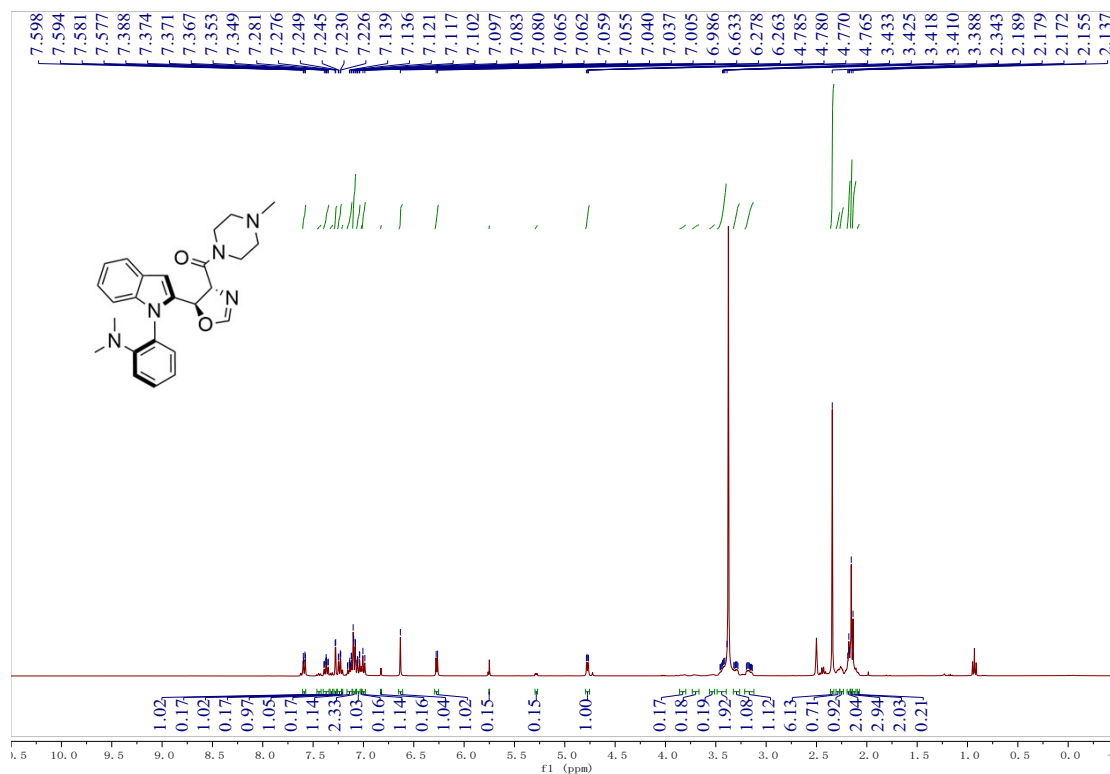

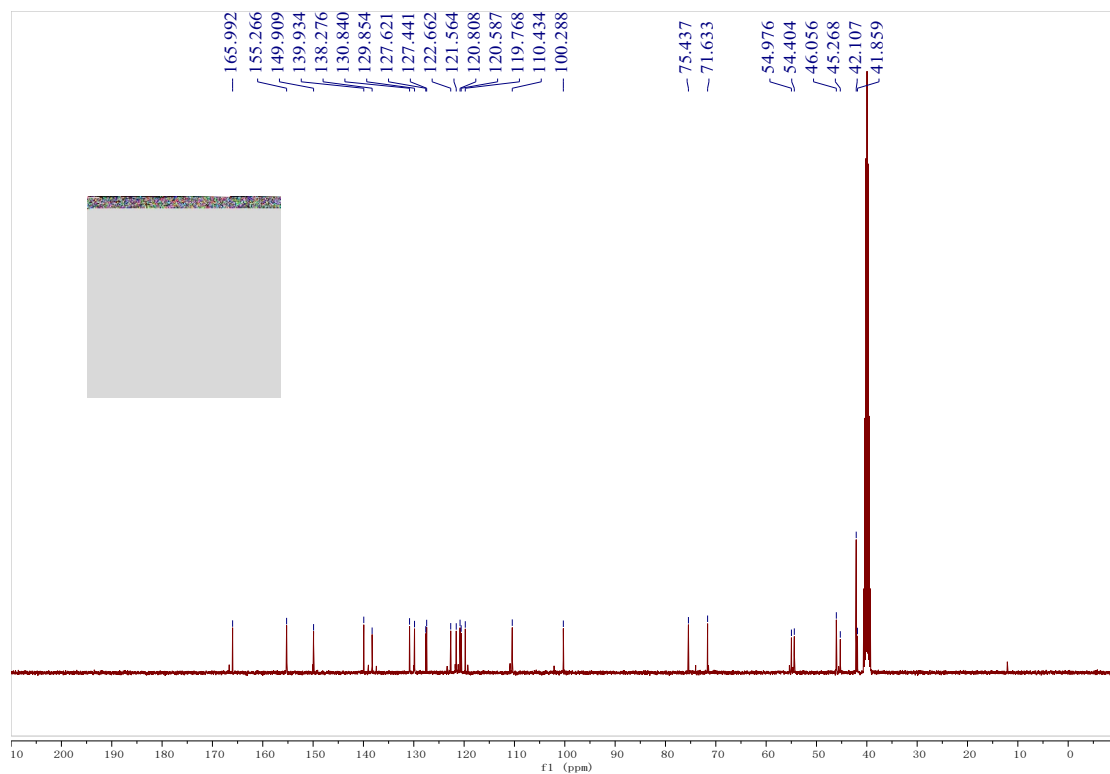

**<sup>1</sup>H NMR of 5a (400 MHz, DMSO-d<sub>6</sub>)**

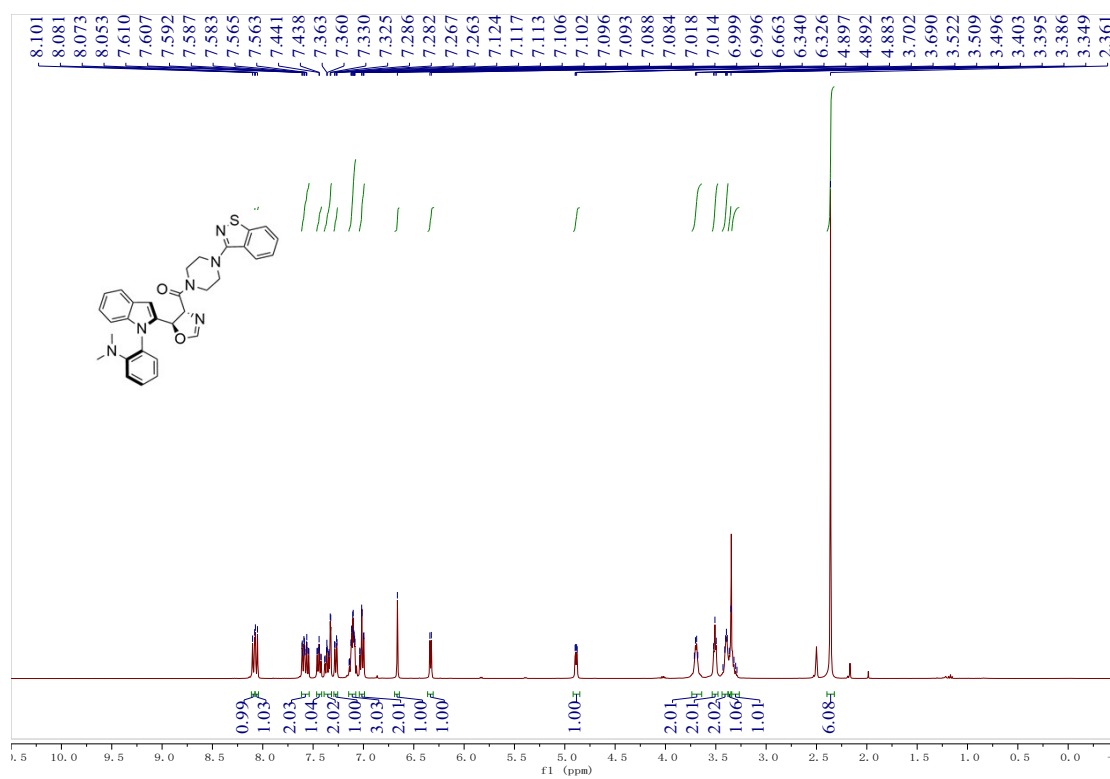

<sup>13</sup>C NMR of 5al (100 MHz, DMSO-d<sub>6</sub>)

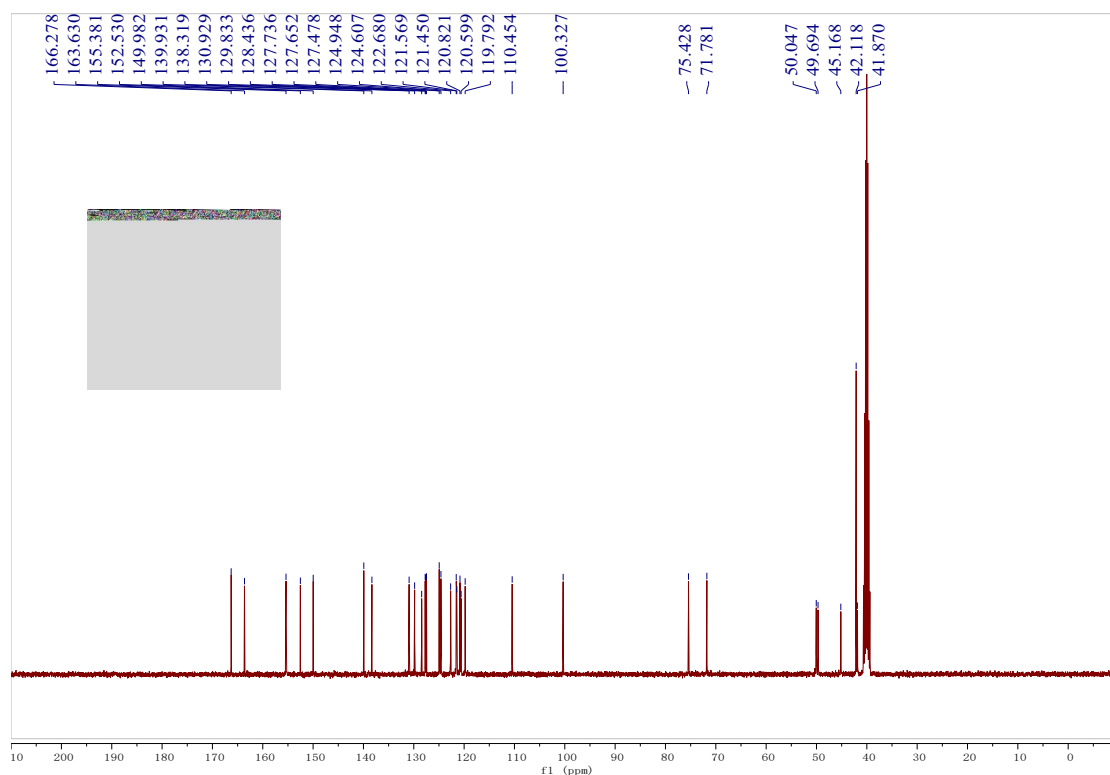

<sup>1</sup>H NMR of 5am (400 MHz, DMSO-d<sub>6</sub>)

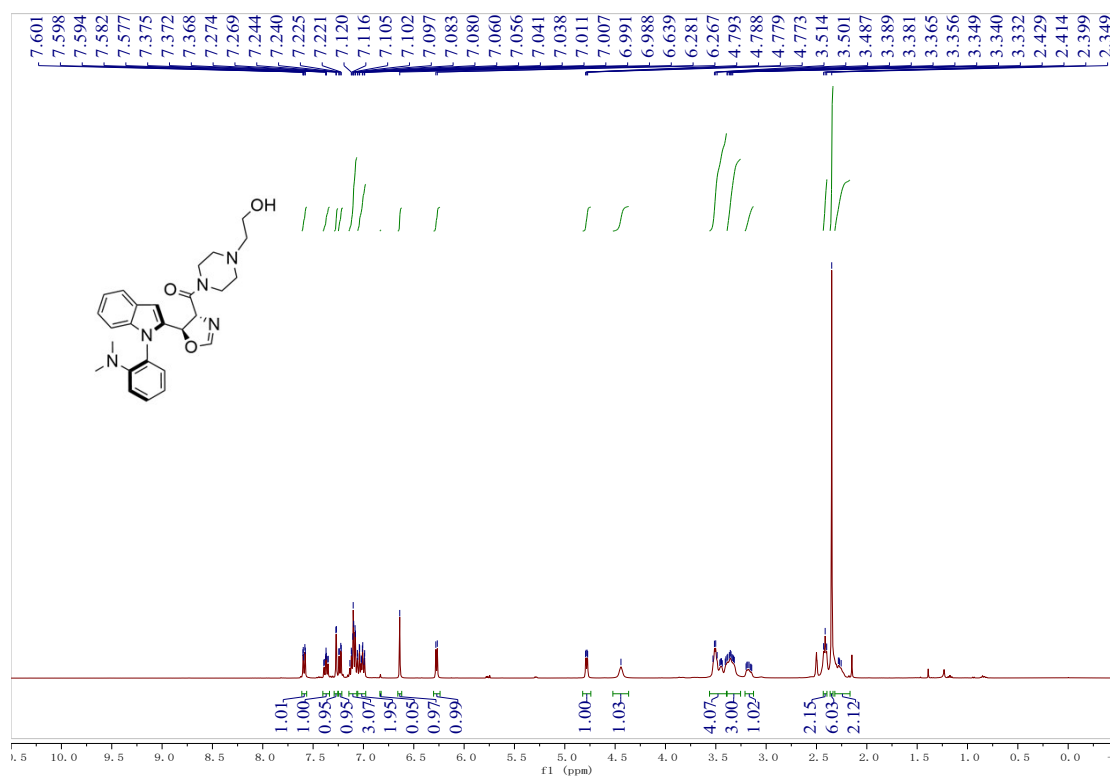

**<sup>13</sup>C NMR of 5am (100 MHz, DMSO-d<sub>6</sub>)**

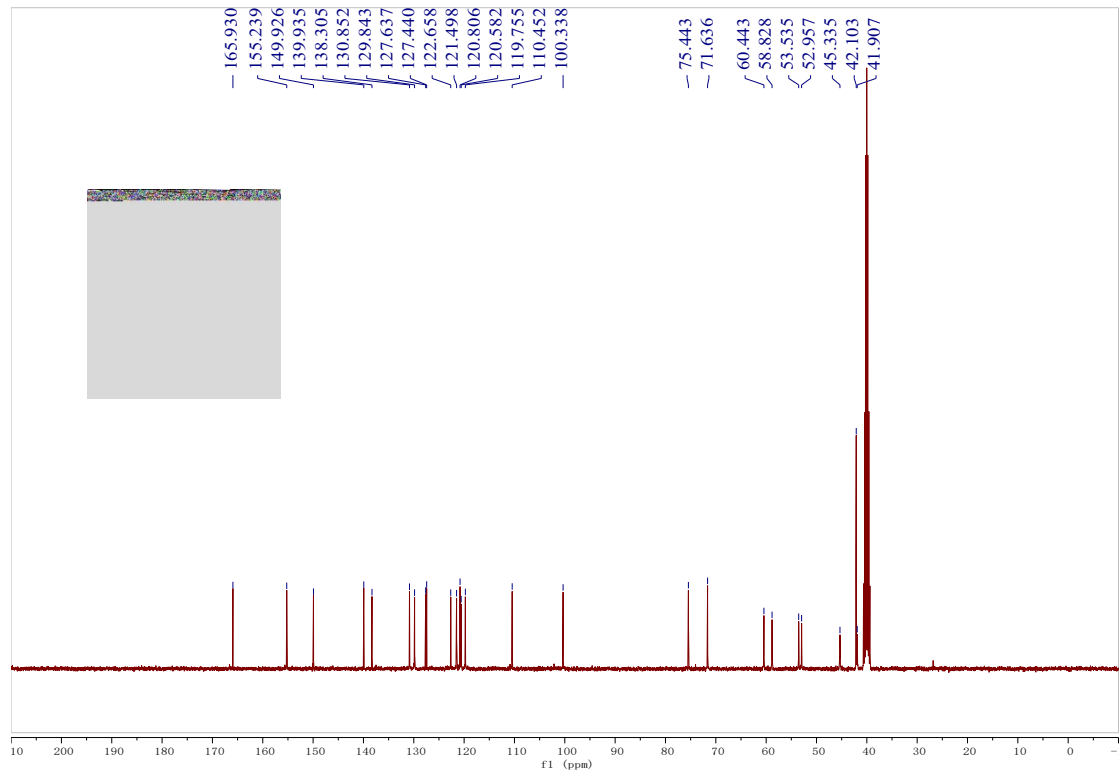

**<sup>1</sup>H NMR of 6aa (400 MHz, DMSO-d<sub>6</sub>)**

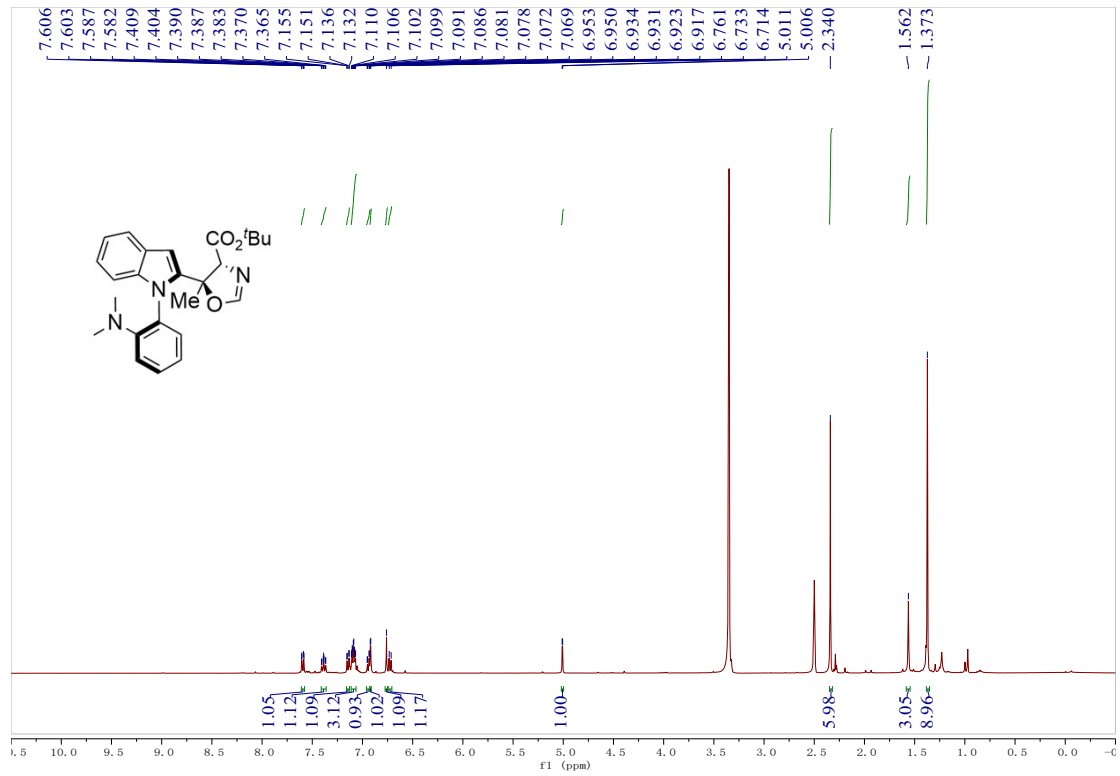

**<sup>13</sup>C NMR of 6aa (100 MHz, DMSO-d<sub>6</sub>)**

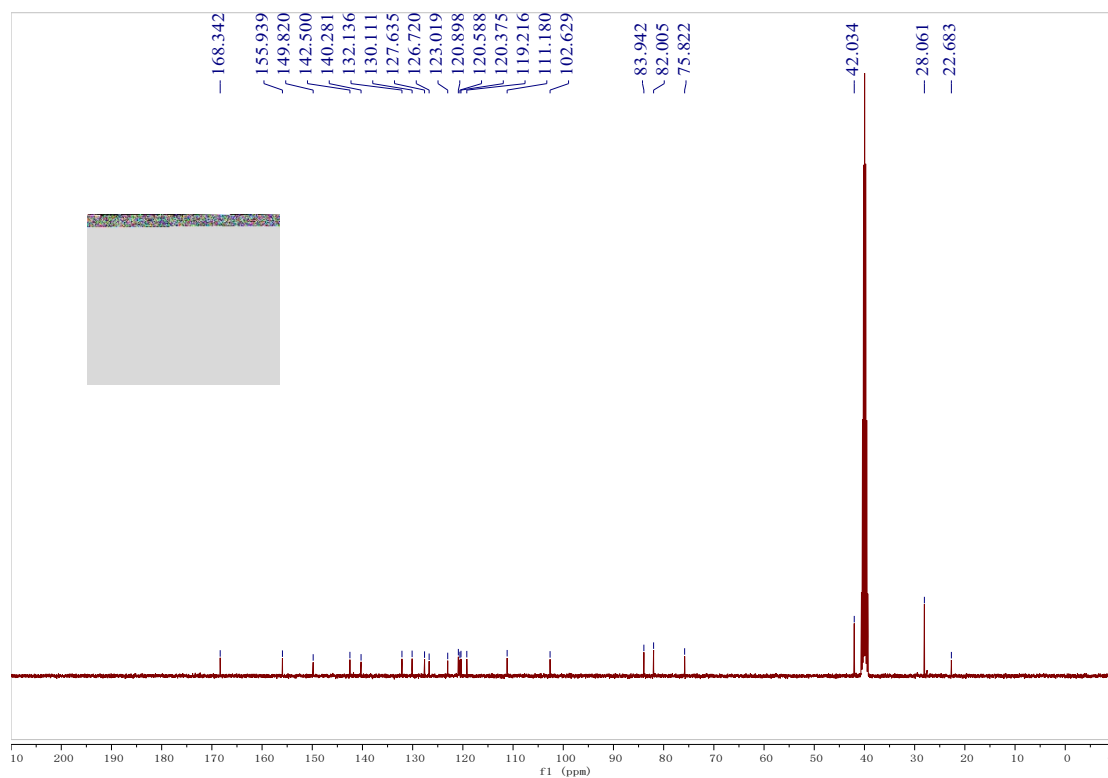

**<sup>1</sup>H NMR of 6ab (400 MHz, DMSO-d<sub>6</sub>)**

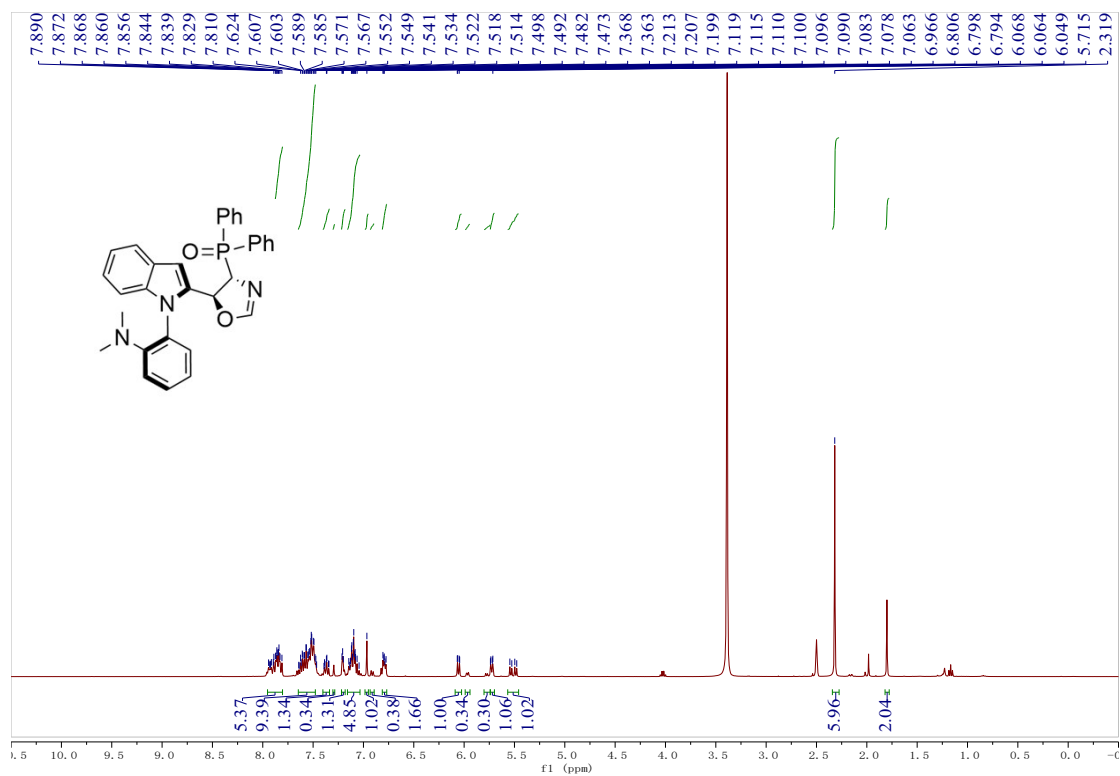

**<sup>13</sup>C NMR of 6ab (100 MHz, DMSO-*d*<sub>6</sub>)**

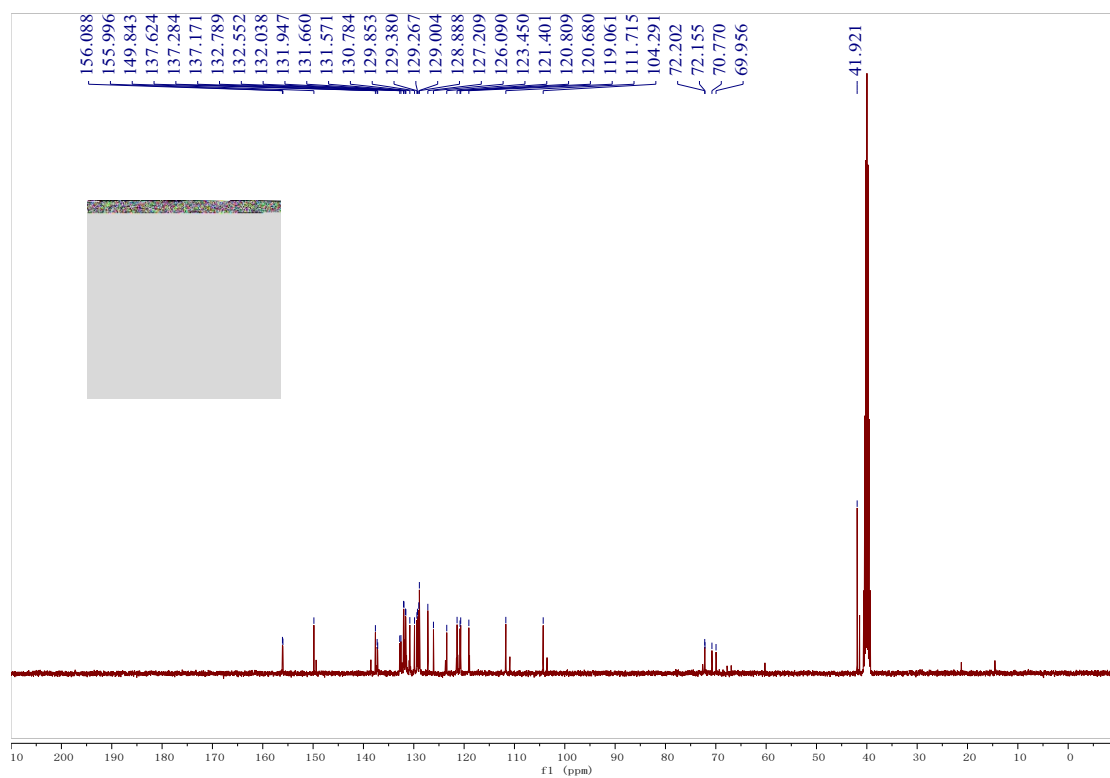

**<sup>31</sup>P NMR of 6ab (162 MHz, DMSO-*d*<sub>6</sub>)**

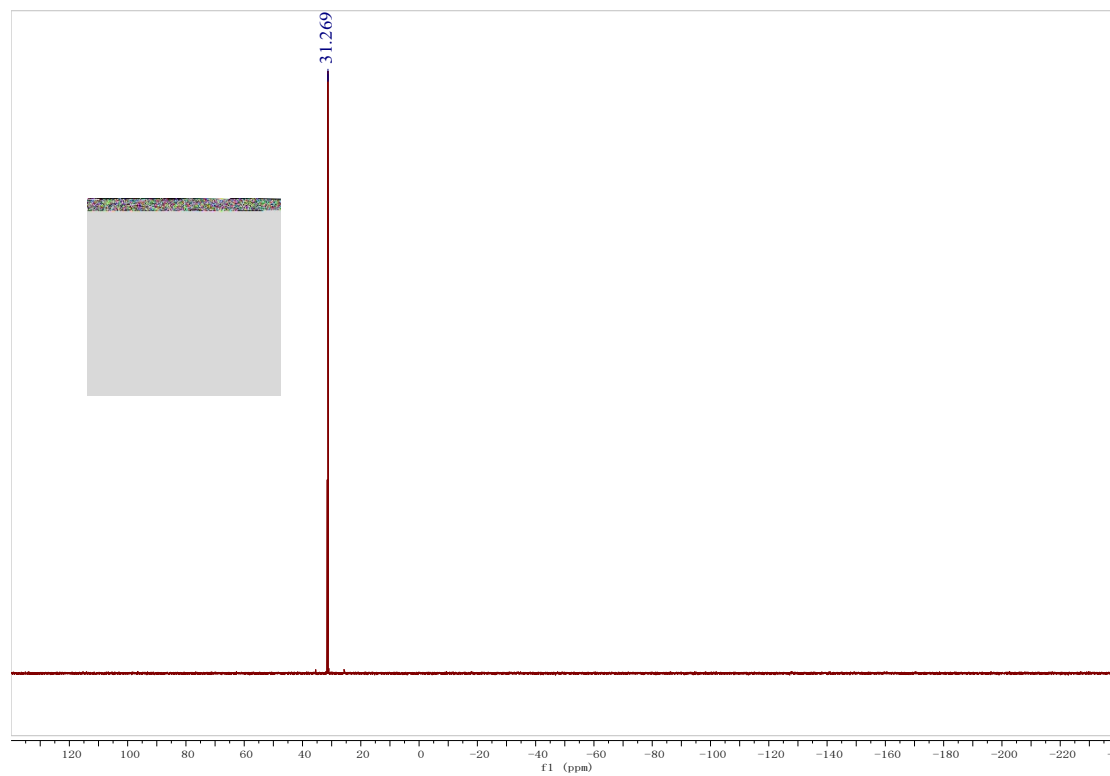

**<sup>1</sup>H NMR of 7ab (400 MHz, DMSO-d<sub>6</sub>)**

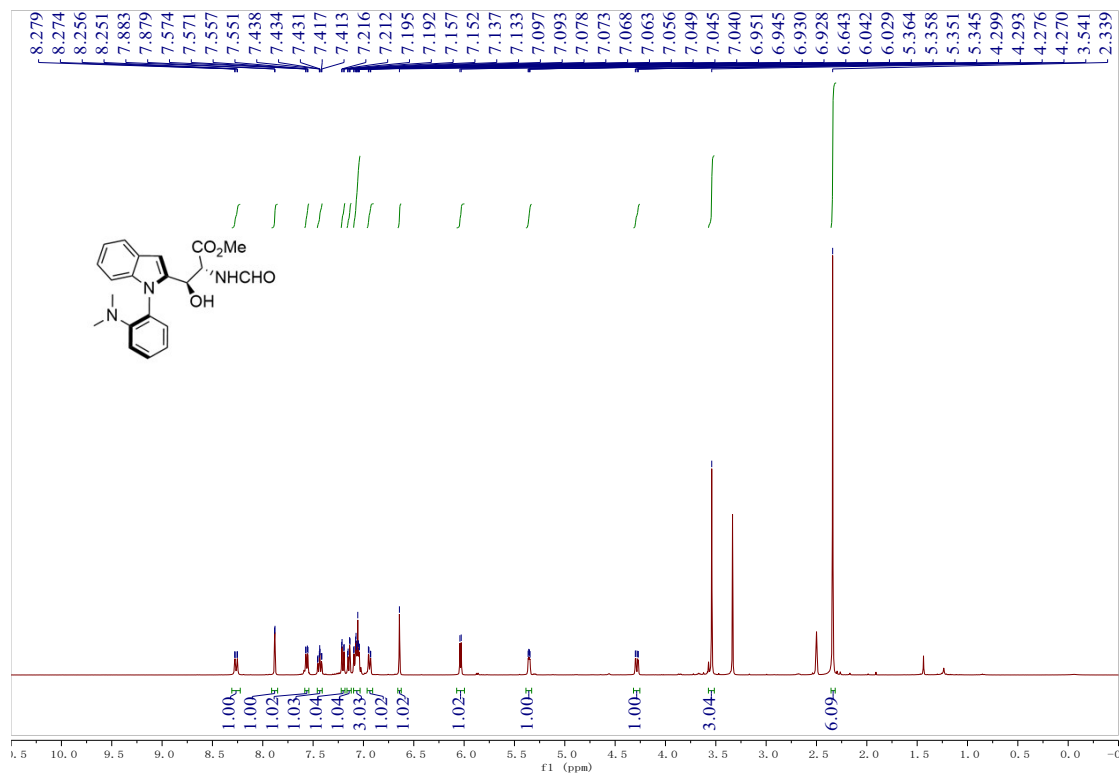

**<sup>13</sup>C NMR of 7ab (100 MHz, DMSO-d<sub>6</sub>)**

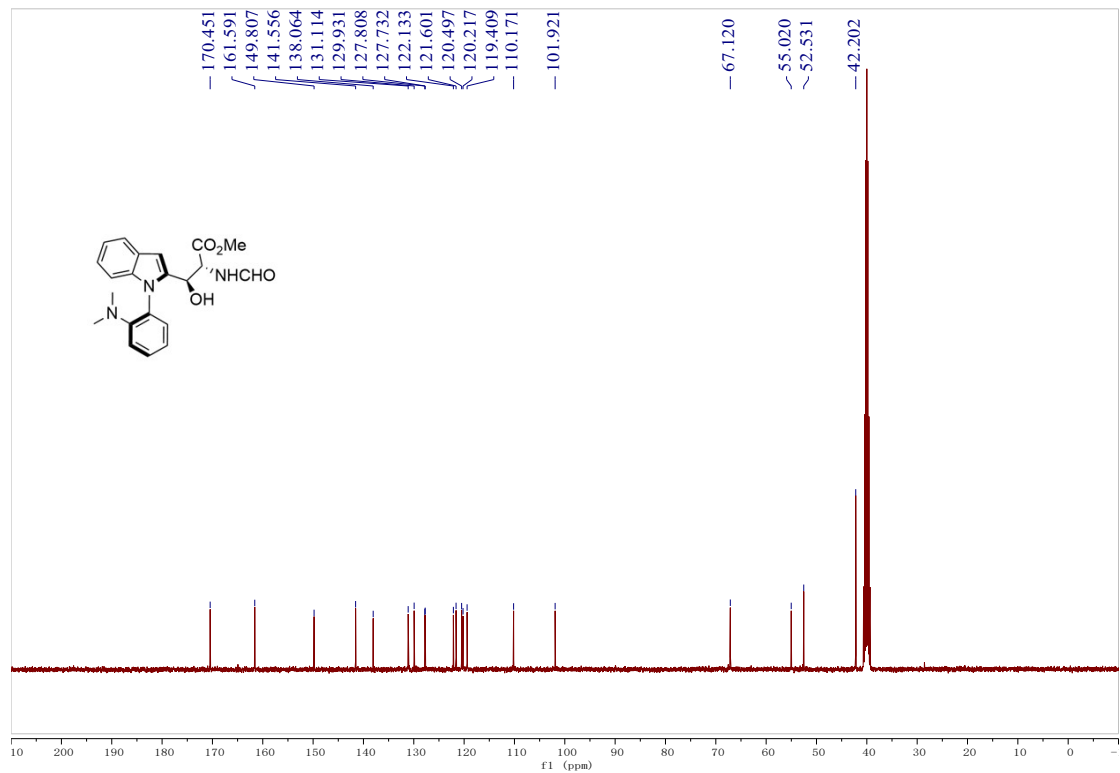

### <sup>1</sup>H NMR of 8ab (400 MHz, DMSO-d<sub>6</sub>)

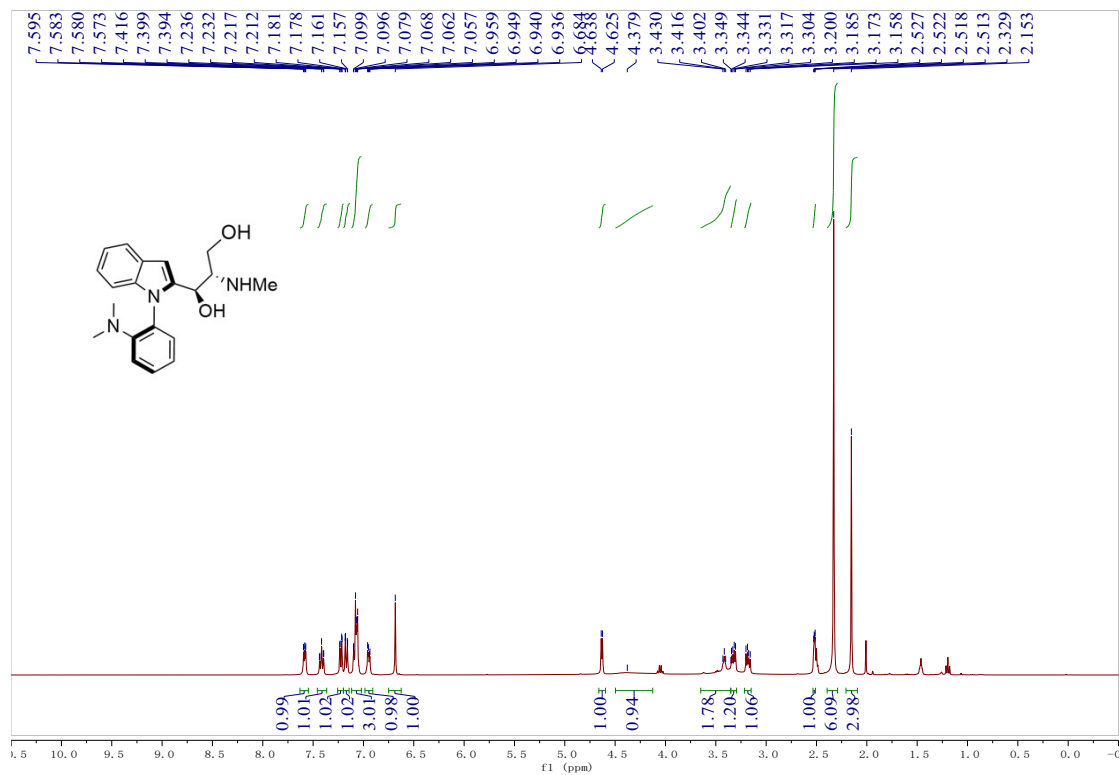

### <sup>13</sup>C NMR of 8ab (100 MHz, DMSO-d<sub>6</sub>)

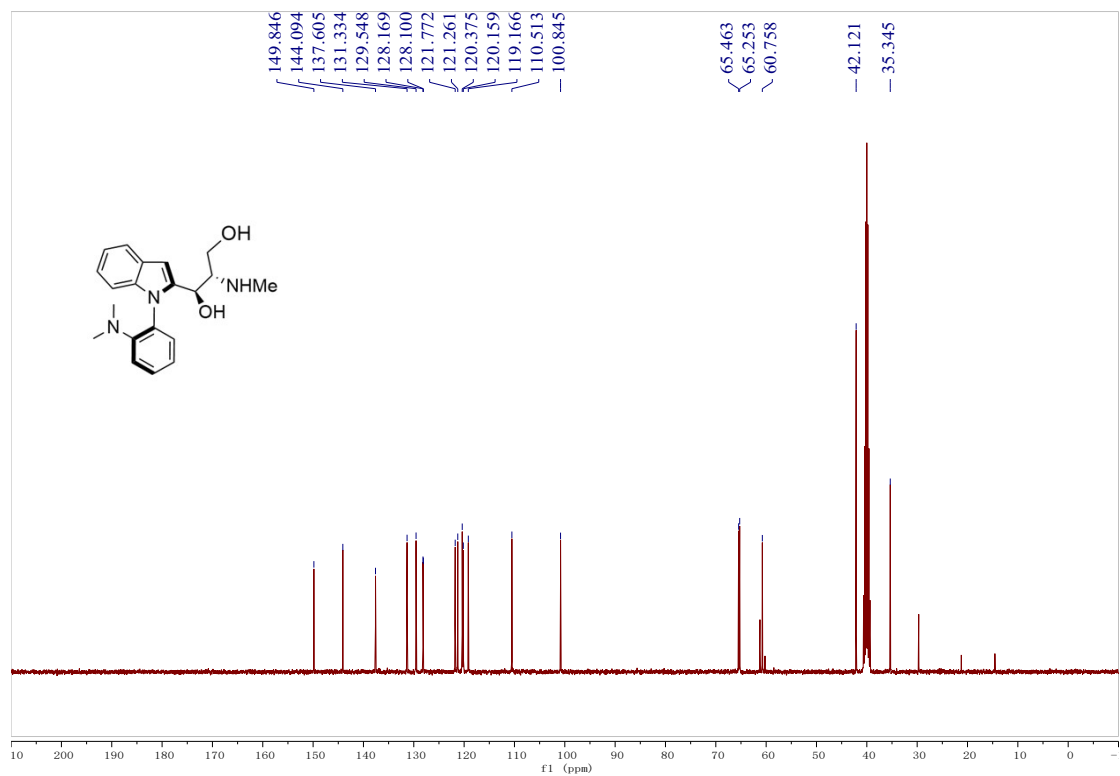

## 11.HPLC chromatograms

### HPLC spectra for racemic and chiral product 3aa

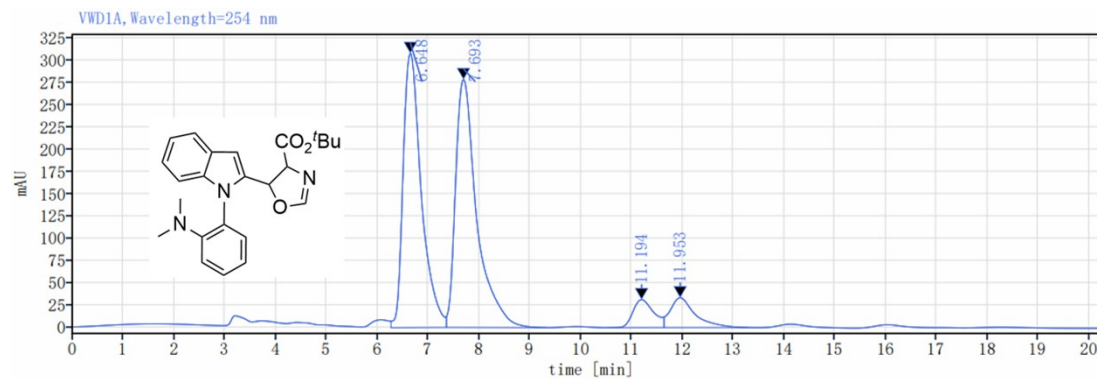

signal : VWD1A, Wavelength=254 nm

| Ret time [min] | Width [min] | Height | Area    | Area % |
|----------------|-------------|--------|---------|--------|
| 6.65           | 1.09        | 308.22 | 7677.72 | 43.15  |
| 7.69           | 1.98        | 278.60 | 8085.46 | 45.45  |
| 11.19          | 1.11        | 31.48  | 891.73  | 5.01   |
| 11.95          | 1.65        | 33.56  | 1136.84 | 6.39   |

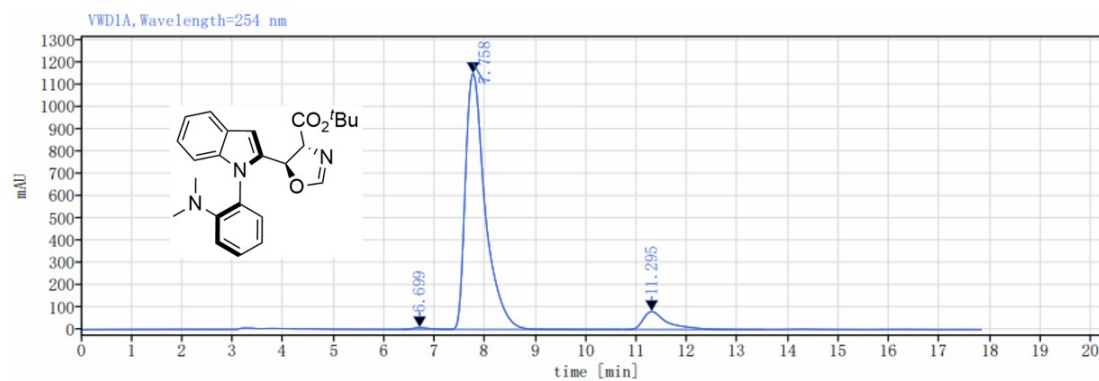

signal : VWD1A, Wavelength=254 nm

| Ret time [min] | Width [min] | Height  | Area     | Area % |
|----------------|-------------|---------|----------|--------|
| 6.70           | 0.96        | 7.62    | 185.03   | 0.54   |
| 7.76           | 3.38        | 1150.85 | 31401.09 | 91.63  |
| 11.30          | 2.80        | 80.85   | 2681.59  | 7.83   |

## HPLC spectra for racemic and chiral product 3ba

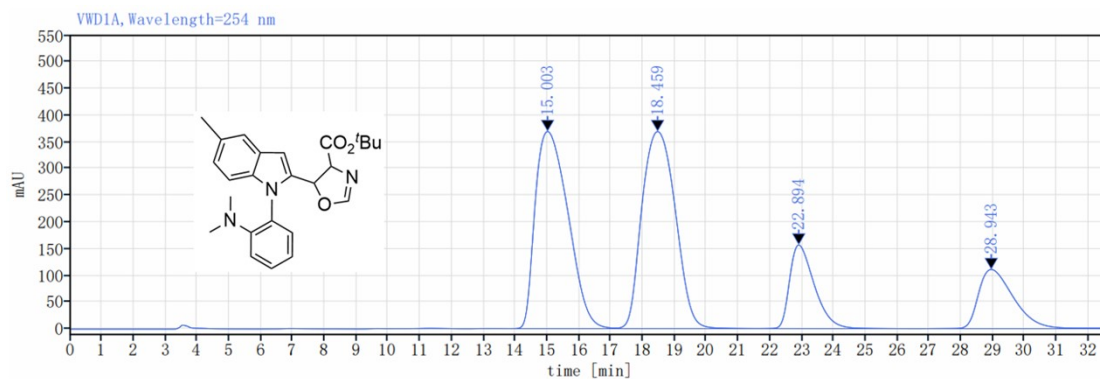

signal : VWD1A, Wavelength=254 nm

| Ret time [min] | Width [min] | Height | Area     | Area % |
|----------------|-------------|--------|----------|--------|
| 15.00          | 3.33        | 369.39 | 26525.33 | 37.59  |
| 18.46          | 4.44        | 369.24 | 27000.76 | 38.27  |
| 22.89          | 4.93        | 156.79 | 8468.20  | 12.00  |
| 28.94          | 6.63        | 110.98 | 8568.08  | 12.14  |

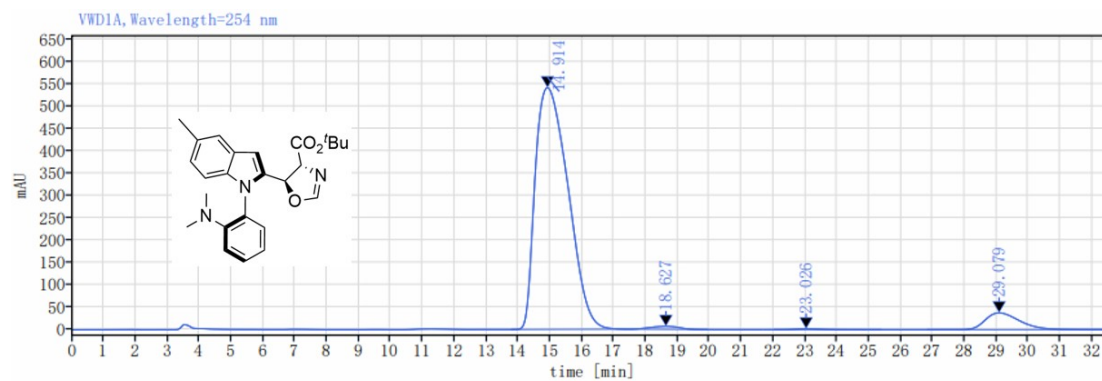

signal : VWD1A, Wavelength=254 nm

| Ret time [min] | Width [min] | Height | Area     | Area % |
|----------------|-------------|--------|----------|--------|
| 14.91          | 3.68        | 542.29 | 38822.74 | 92.15  |
| 18.63          | 2.49        | 6.59   | 419.53   | 1.00   |
| 23.03          | 3.37        | 1.64   | 86.75    | 0.21   |
| 29.08          | 6.41        | 37.61  | 2800.96  | 6.65   |

## HPLC spectra for racemic and chiral product 3ca

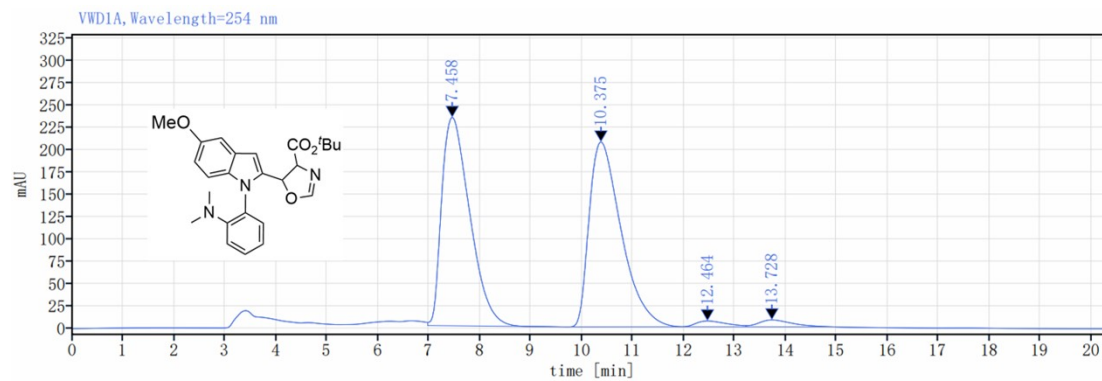

signal : VWD1A, Wavelength=254 nm

| Ret time [min] | Width [min] | Height | Area    | Area % |
|----------------|-------------|--------|---------|--------|
| 7.46           | 2.70        | 233.51 | 8946.04 | 48.10  |
| 10.37          | 2.24        | 207.15 | 9036.92 | 48.59  |
| 12.46          | 1.26        | 6.47   | 265.02  | 1.43   |
| 13.73          | 1.71        | 7.72   | 349.22  | 1.88   |

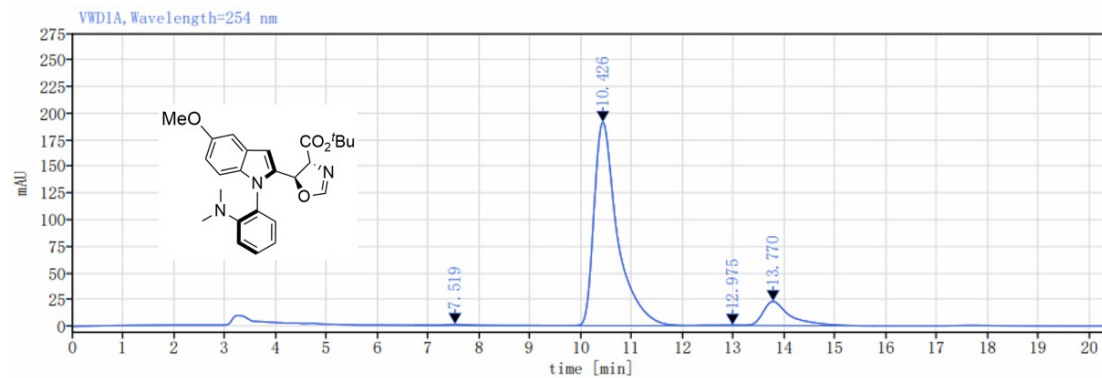

signal : VWD1A, Wavelength=254 nm

| Ret time [min] | Width [min] | Height | Area    | Area % |
|----------------|-------------|--------|---------|--------|
| 7.52           | 2.47        | 0.93   | 18.29   | 0.26   |
| 10.43          | 2.39        | 190.77 | 6087.85 | 87.76  |
| 12.97          | 1.06        | 0.16   | 6.82    | 0.10   |
| 13.77          | 2.59        | 22.50  | 824.31  | 11.88  |

## HPLC spectra for racemic and chiral product 3da

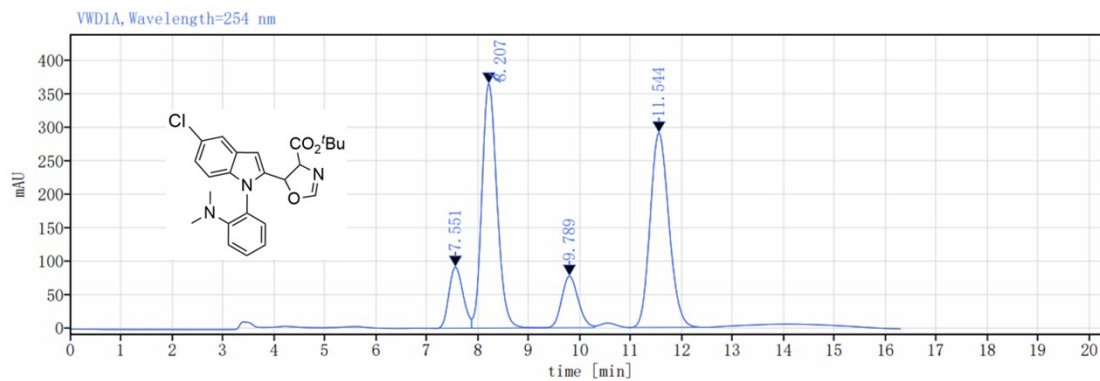

signal : VWD1A, Wavelength=254 nm

| Ret time [min] | Width [min] | Height | Area    | Area % |
|----------------|-------------|--------|---------|--------|
| 7.55           | 0.71        | 91.36  | 1754.15 | 9.53   |
| 8.21           | 1.36        | 364.97 | 7476.27 | 40.62  |
| 9.79           | 1.04        | 77.05  | 1730.21 | 9.40   |
| 11.54          | 1.47        | 290.76 | 7446.15 | 40.45  |

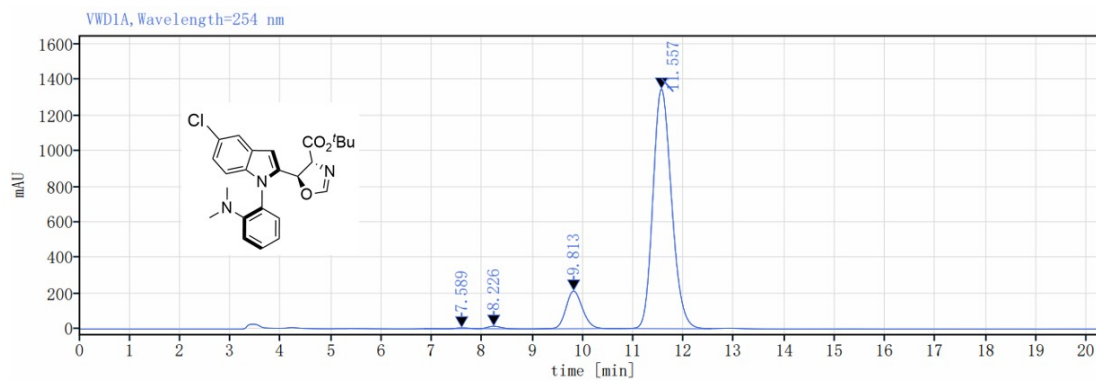

signal : VWD1A, Wavelength=254 nm

| Ret time [min] | Width [min] | Height | Area     | Area % |
|----------------|-------------|--------|----------|--------|
| 7.59           | 1.02        | 4.35   | 61.87    | 0.16   |
| 8.23           | 1.06        | 14.07  | 260.61   | 0.65   |
| 9.81           | 1.73        | 211.93 | 4842.81  | 12.17  |
| 11.56          | 1.89        | 1347.  | 34640.68 | 87.02  |

## HPLC spectra for racemic and chiral product 3ea

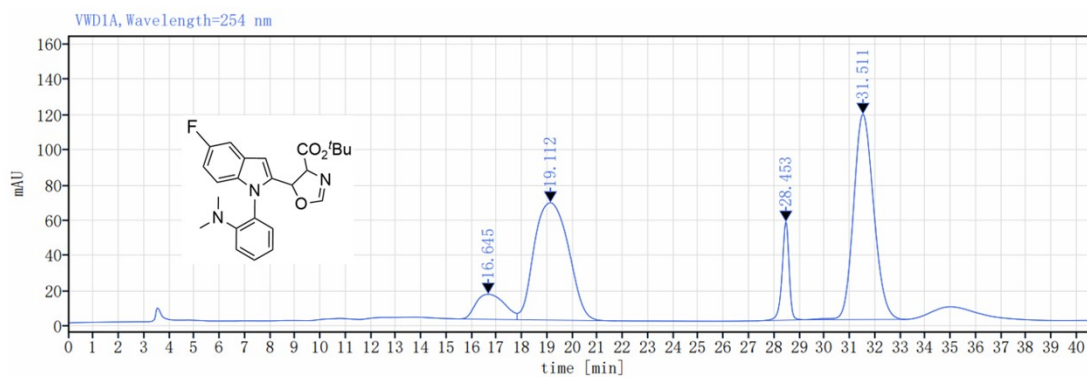

signal : VWD1A, Wavelength=254 nm

| Ret time [min] | Width [min] | Height | Area    | Area % |
|----------------|-------------|--------|---------|--------|
| 16.65          | 2.31        | 14.26  | 1127.29 | 7.52   |
| 19.11          | 3.94        | 66.65  | 6322.89 | 42.18  |
| 28.45          | 1.93        | 55.73  | 1073.48 | 7.16   |
| 31.51          | 3.99        | 116.57 | 6467.10 | 43.14  |

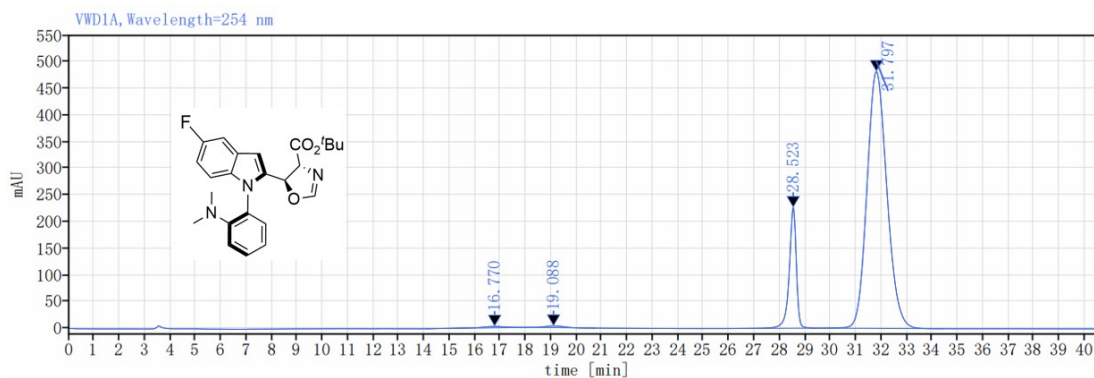

signal : VWD1A, Wavelength=254 nm

| Ret time [min] | Width [min] | Height | Area     | Area % |
|----------------|-------------|--------|----------|--------|
| 16.77          | 4.17        | 2.67   | 201.53   | 0.65   |
| 19.09          | 2.52        | 2.94   | 161.13   | 0.52   |
| 28.52          | 3.58        | 226.30 | 4418.65  | 14.22  |
| 31.80          | 4.93        | 482.00 | 26289.15 | 84.61  |

## HPLC spectra for racemic and chiral product 3fa

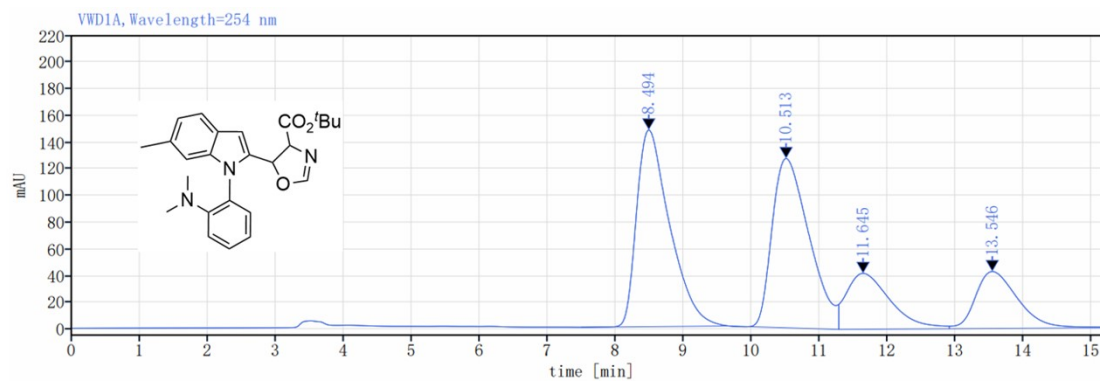

signal : VWD1A, Wavelength=254 nm

| Ret time [min] | Width [min] | Height | Area    | Area % |
|----------------|-------------|--------|---------|--------|
| 8.49           | 2.18        | 147.26 | 4980.36 | 36.90  |
| 10.51          | 1.61        | 126.68 | 4792.94 | 35.51  |
| 11.64          | 1.62        | 41.84  | 1868.64 | 13.85  |
| 13.55          | 3.35        | 42.61  | 1854.16 | 13.74  |

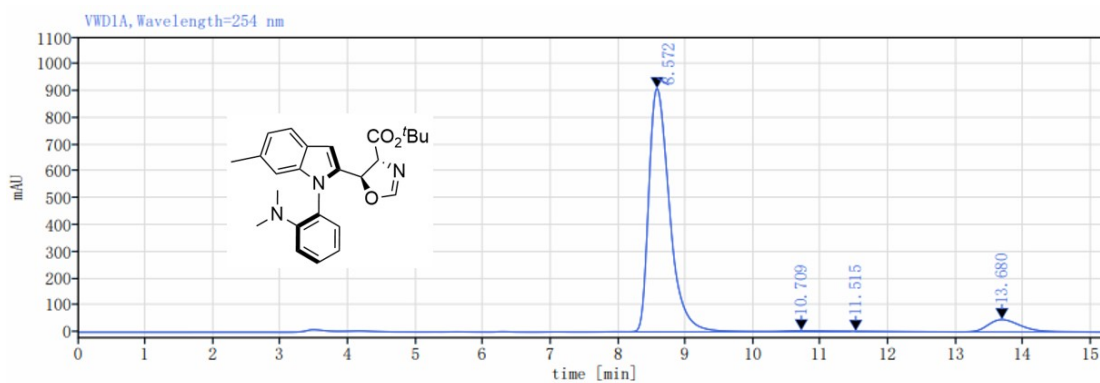

signal : VWD1A, Wavelength=254 nm

| Ret time [min] | Width [min] | Height | Area     | Area % |
|----------------|-------------|--------|----------|--------|
| 8.57           | 2.05        | 908.27 | 19343.74 | 91.53  |
| 10.71          | 1.25        | 3.74   | 179.29   | 0.85   |
| 11.51          | 1.05        | 1.61   | 44.80    | 0.21   |
| 13.68          | 2.58        | 46.17  | 1565.74  | 7.41   |

## HPLC spectra for racemic and chiral product 3ga

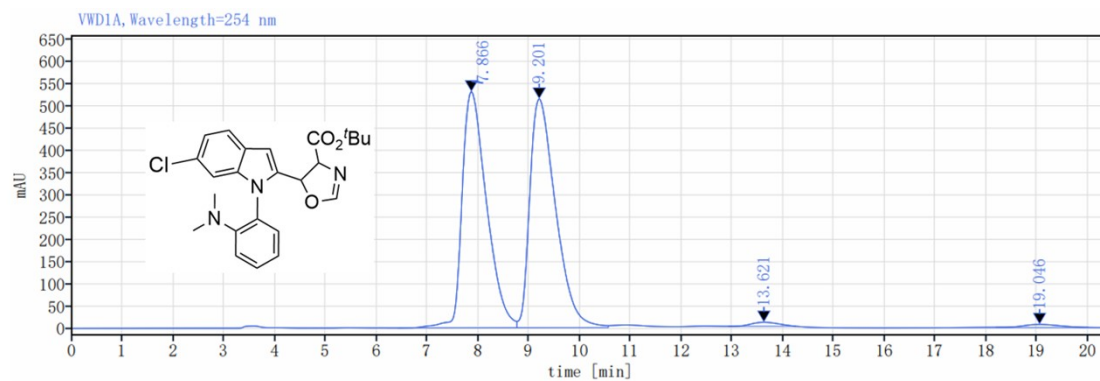

signal : VWD1A, Wavelength=254 nm

| Ret time [min] | Width [min] | Height | Area     | Area % |
|----------------|-------------|--------|----------|--------|
| 7.87           | 2.34        | 530.37 | 17705.29 | 48.56  |
| 9.20           | 1.80        | 513.83 | 18092.47 | 49.62  |
| 13.62          | 1.33        | 9.13   | 343.49   | 0.94   |
| 19.05          | 1.83        | 6.67   | 319.08   | 0.88   |

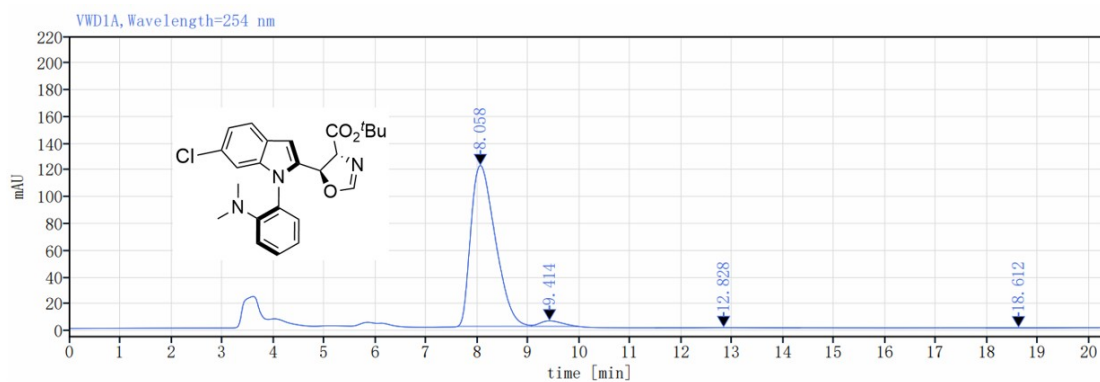

signal : VWD1A, Wavelength=254 nm

| Ret time [min] | Width [min] | Height | Area    | Area % |
|----------------|-------------|--------|---------|--------|
| 8.06           | 1.45        | 120.18 | 4020.64 | 96.56  |
| 9.41           | 0.91        | 4.14   | 125.13  | 3.01   |
| 12.83          | 2.86        | 0.19   | 14.85   | 0.36   |
| 18.61          | 2.23        | 0.05   | 3.15    | 0.08   |

## HPLC spectra for racemic and chiral product 3ha

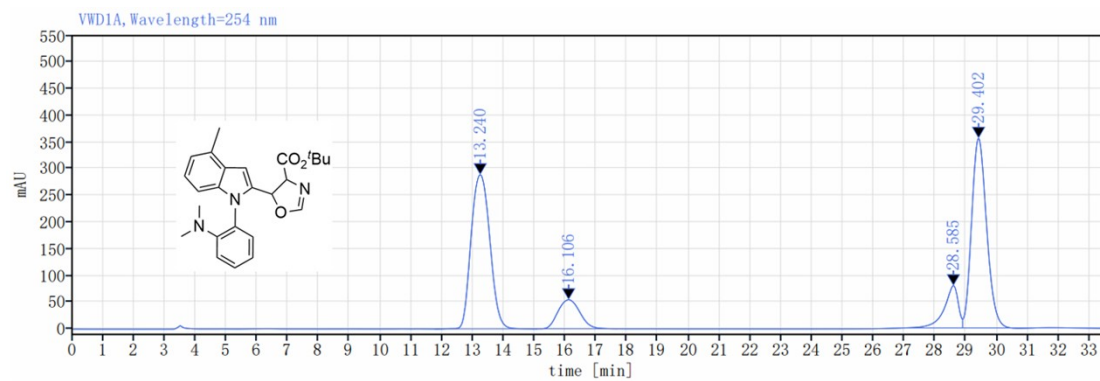

signal : VWD1A, Wavelength=254 nm

| Ret time [min] | Width [min] | Height | Area     | Area % |
|----------------|-------------|--------|----------|--------|
| 13.24          | 3.33        | 288.82 | 12206.56 | 41.50  |
| 16.11          | 2.47        | 54.37  | 2695.17  | 9.16   |
| 28.59          | 1.92        | 79.03  | 2503.43  | 8.51   |
| 29.40          | 2.34        | 355.15 | 12008.32 | 40.83  |

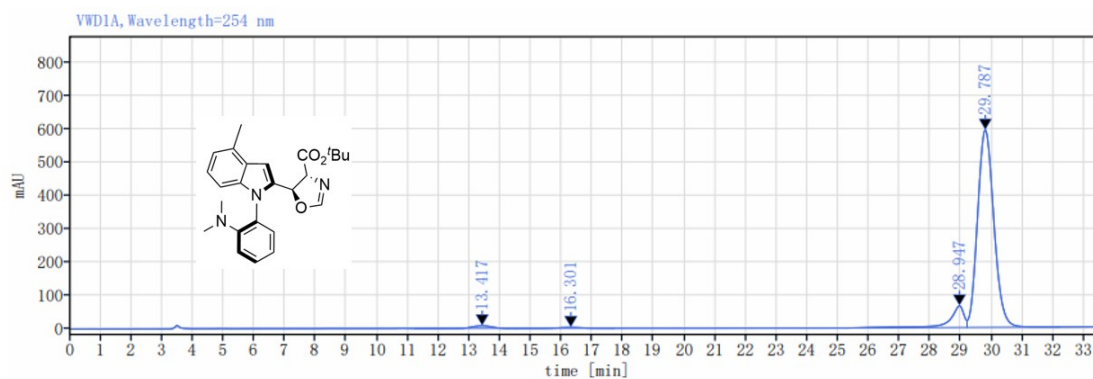

signal : VWD1A, Wavelength=254 nm

| Ret time [min] | Width [min] | Height | Area     | Area % |
|----------------|-------------|--------|----------|--------|
| 13.42          | 3.17        | 7.59   | 334.05   | 1.36   |
| 16.30          | 3.32        | 2.47   | 134.43   | 0.55   |
| 28.95          | 4.00        | 64.88  | 2143.99  | 8.76   |
| 29.79          | 3.04        | 593.51 | 21871.39 | 89.33  |

## HPLC spectra for racemic and chiral product 3ia

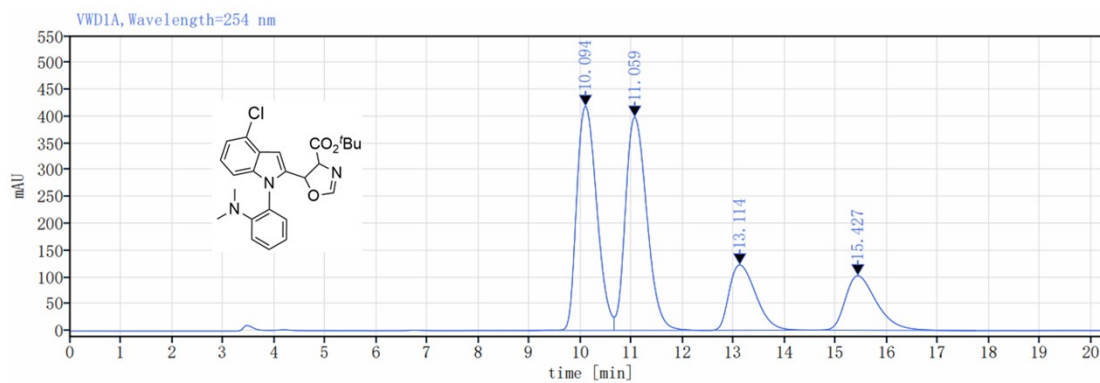

signal : VWD1A, Wavelength=254 nm

| Ret time [min] | Width [min] | Height | Area     | Area % |
|----------------|-------------|--------|----------|--------|
| 10.09          | 1.69        | 418.08 | 11430.91 | 35.96  |
| 11.06          | 1.81        | 397.86 | 11607.24 | 36.52  |
| 13.11          | 2.08        | 122.00 | 4411.11  | 13.88  |
| 15.43          | 3.19        | 101.70 | 4335.59  | 13.64  |

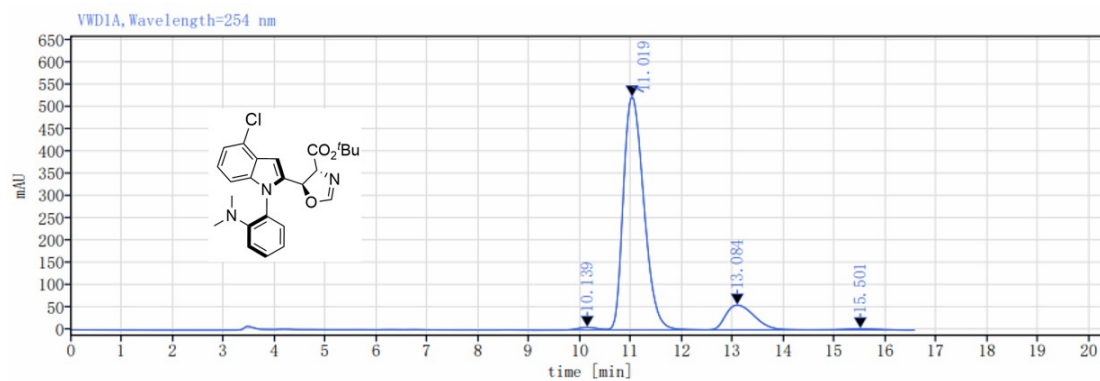

signal : VWD1A, Wavelength=254 nm

| Ret time [min] | Width [min] | Height | Area     | Area % |
|----------------|-------------|--------|----------|--------|
| 10.14          | 1.46        | 6.14   | 168.75   | 0.98   |
| 11.02          | 1.96        | 524.01 | 14675.86 | 85.52  |
| 13.08          | 2.03        | 55.93  | 2188.01  | 12.75  |
| 15.50          | 1.99        | 2.86   | 128.41   | 0.75   |

## HPLC spectra for racemic and chiral product 3ja

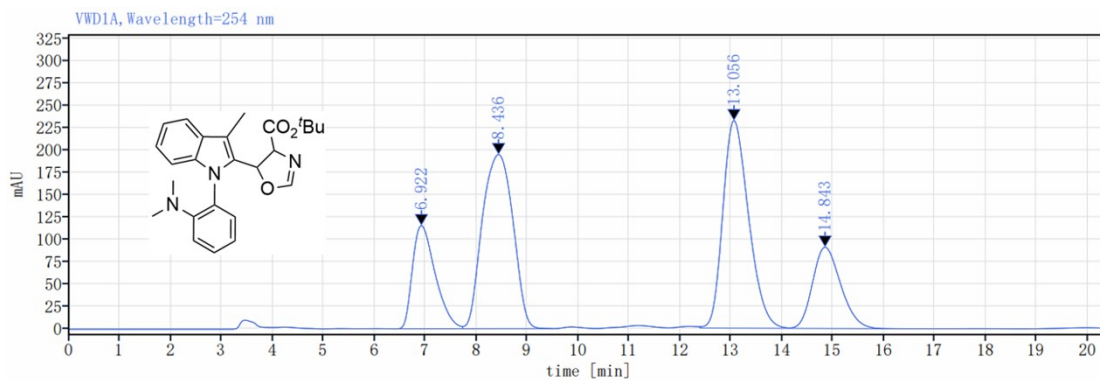

signal : VWD1A, Wavelength=254 nm

| Ret time [min] | Width [min] | Height | Area    | Area % |
|----------------|-------------|--------|---------|--------|
| 6.92           | 1.32        | 115.74 | 3590.51 | 15.31  |
| 8.44           | 1.77        | 195.31 | 8184.71 | 34.90  |
| 13.06          | 1.76        | 232.67 | 8163.12 | 34.81  |
| 14.84          | 2.11        | 91.20  | 3510.41 | 14.97  |

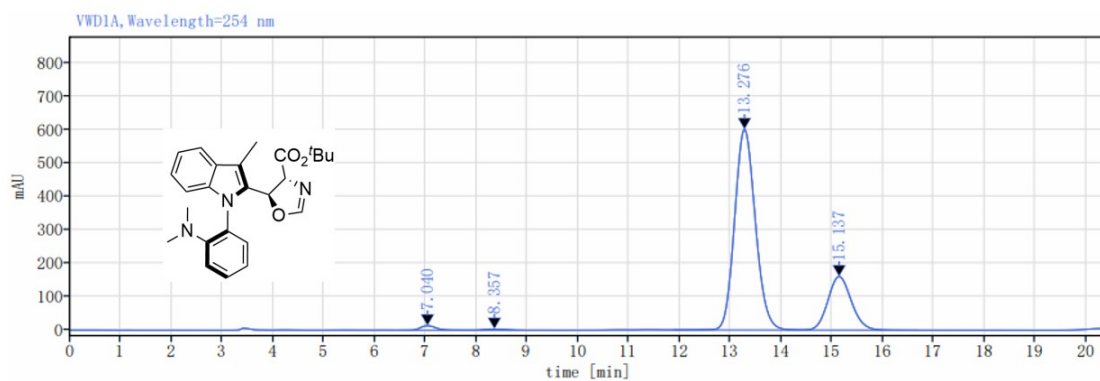

signal : VWD1A, Wavelength=254 nm

| Ret time [min] | Width [min] | Height | Area     | Area % |
|----------------|-------------|--------|----------|--------|
| 7.04           | 1.41        | 13.38  | 285.70   | 1.26   |
| 8.36           | 1.09        | 3.49   | 98.92    | 0.44   |
| 13.28          | 2.52        | 601.99 | 17105.16 | 75.48  |
| 15.14          | 2.30        | 160.89 | 5171.91  | 22.82  |

## HPLC spectra for racemic and chiral product 3ka

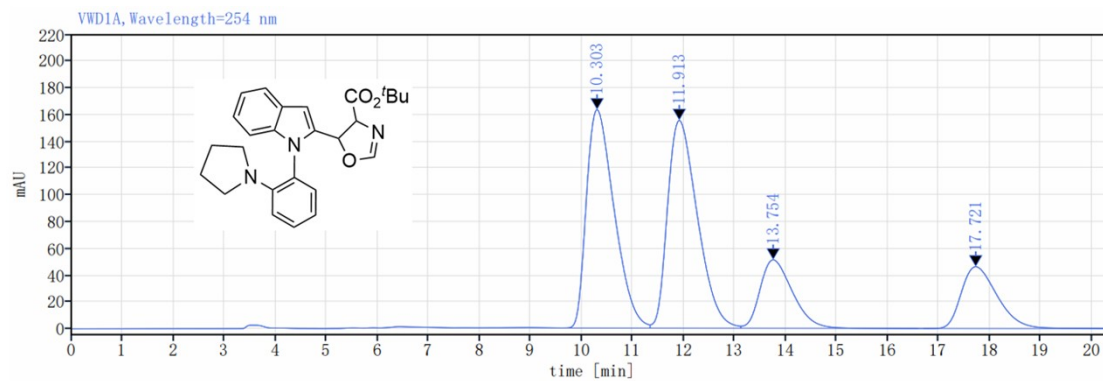

signal : VWD1A, Wavelength=254 nm

| Ret time [min] | Width [min] | Height | Area    | Area % |
|----------------|-------------|--------|---------|--------|
| 10.30          | 1.70        | 163.10 | 6161.55 | 36.28  |
| 11.91          | 1.78        | 155.23 | 6295.86 | 37.07  |
| 13.75          | 3.48        | 51.10  | 2258.41 | 13.30  |
| 17.72          | 4.88        | 46.14  | 2268.66 | 13.36  |

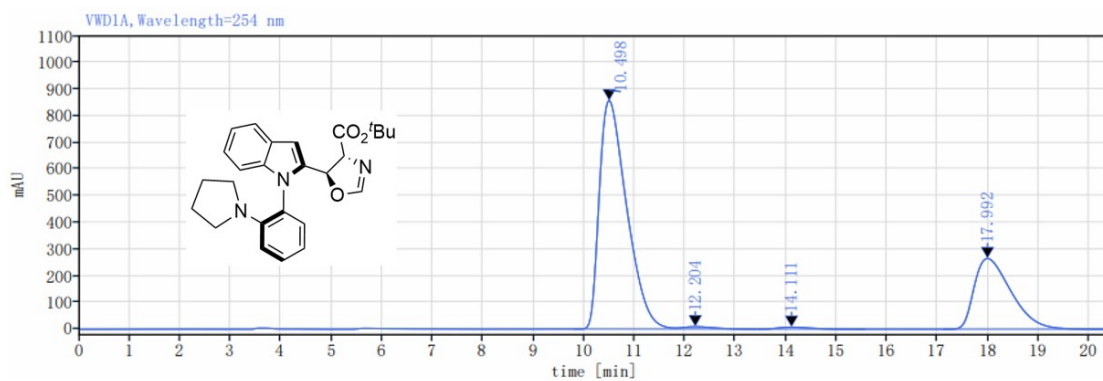

signal : VWD1A, Wavelength=254 nm

| Ret time [min] | Width [min] | Height | Area     | Area % |
|----------------|-------------|--------|----------|--------|
| 10.50          | 2.02        | 856.65 | 32315.44 | 69.53  |
| 12.20          | 1.61        | 8.99   | 383.88   | 0.83   |
| 14.11          | 2.14        | 7.49   | 326.82   | 0.70   |
| 17.99          | 5.67        | 265.15 | 13448.12 | 28.94  |

## HPLC spectra for racemic and chiral product 3la

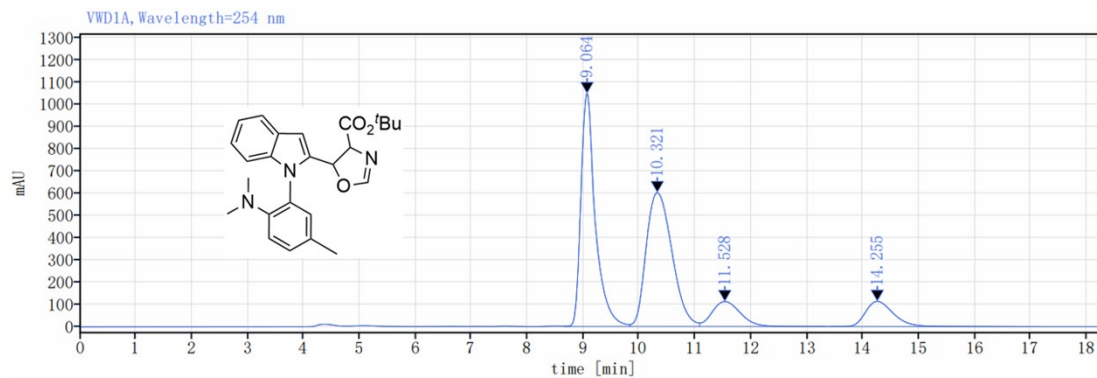

signal : VWD1A, Wavelength=254 nm

| Ret time [min] | Width [min] | Height  | Area     | Area % |
|----------------|-------------|---------|----------|--------|
| 9.06           | 1.18        | 1049.24 | 18784.35 | 40.77  |
| 10.32          | 1.24        | 603.06  | 19327.33 | 41.94  |
| 11.53          | 2.26        | 112.73  | 3976.02  | 8.63   |
| 14.25          | 3.73        | 113.82  | 3991.85  | 8.66   |

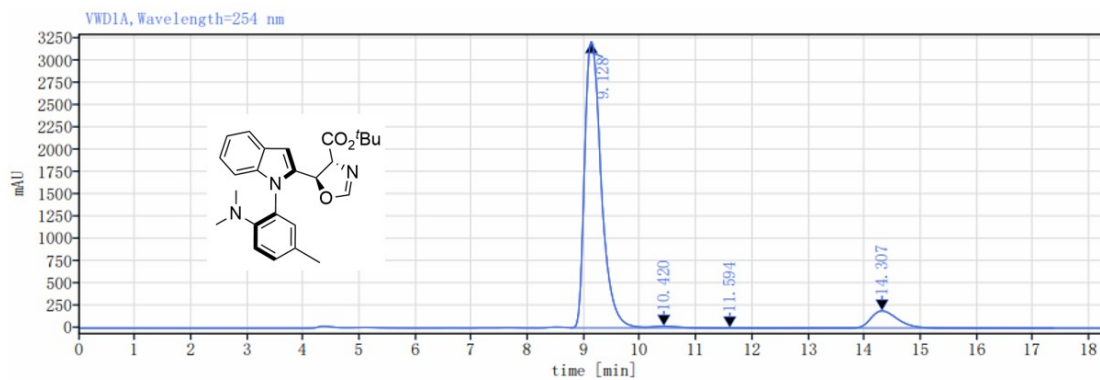

signal : VWD1A, Wavelength=254 nm

| Ret time [min] | Width [min] | Height  | Area     | Area % |
|----------------|-------------|---------|----------|--------|
| 9.13           | 1.33        | 3214.45 | 66317.55 | 90.05  |
| 10.42          | 1.28        | 20.69   | 735.77   | 1.00   |
| 11.59          | 0.87        | 1.67    | 47.45    | 0.06   |
| 14.31          | 5.13        | 192.94  | 6540.84  | 8.88   |

## HPLC spectra for racemic and chiral product 3ma

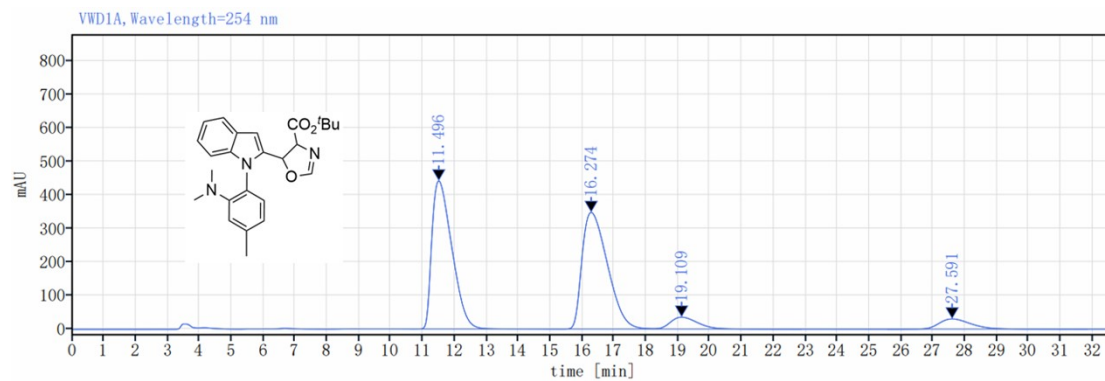

signal : VWD1A, Wavelength=254 nm

| Ret time [min] | Width [min] | Height | Area     | Area % |
|----------------|-------------|--------|----------|--------|
| 11.50          | 4.71        | 442.75 | 19352.64 | 45.02  |
| 16.27          | 2.88        | 348.75 | 19332.40 | 44.97  |
| 19.11          | 4.64        | 35.91  | 2150.17  | 5.00   |
| 27.59          | 6.30        | 30.84  | 2151.56  | 5.01   |

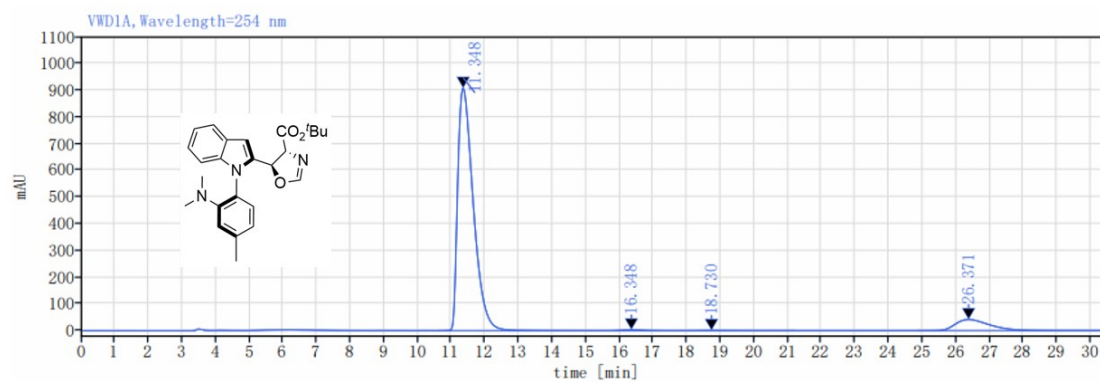

signal : VWD1A, Wavelength=254 nm

| Ret time [min] | Width [min] | Height | Area     | Area % |
|----------------|-------------|--------|----------|--------|
| 11.35          | 4.89        | 908.29 | 29257.69 | 90.25  |
| 16.35          | 2.25        | 3.13   | 138.02   | 0.43   |
| 18.73          | 3.49        | 0.70   | 36.91    | 0.11   |
| 26.37          | 5.88        | 41.57  | 2985.83  | 9.21   |

## HPLC spectra for racemic and chiral product 3ab

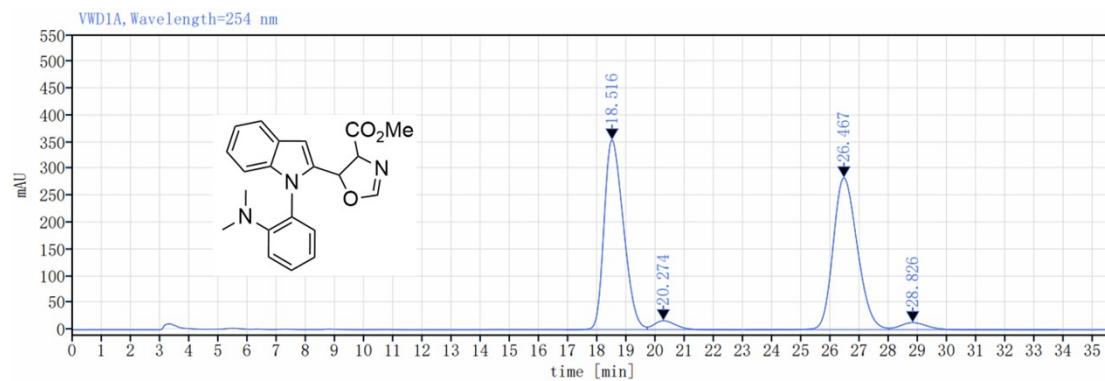

signal : VWD1A, Wavelength=254 nm

| Ret time [min] | Width [min] | Height | Area     | Area % |
|----------------|-------------|--------|----------|--------|
| 18.52          | 2.77        | 354.11 | 16293.32 | 47.41  |
| 20.27          | 3.23        | 16.65  | 862.37   | 2.51   |
| 26.47          | 4.95        | 283.46 | 16356.56 | 47.60  |
| 28.83          | 5.83        | 13.18  | 852.78   | 2.48   |

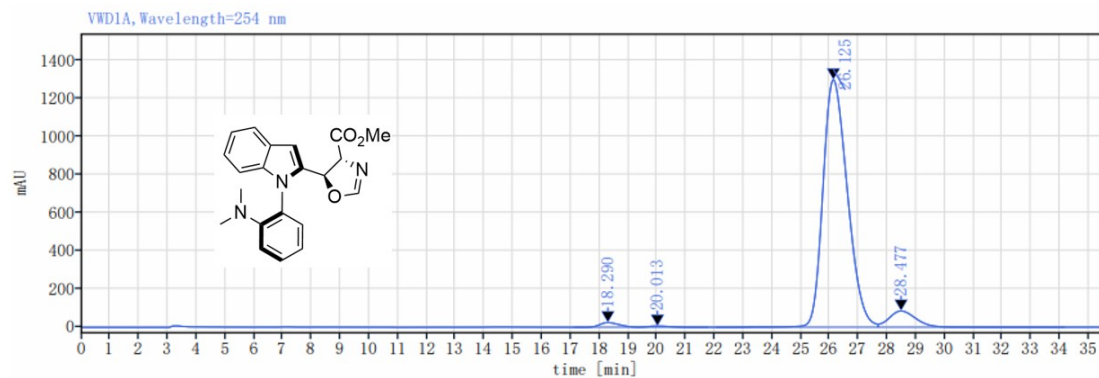

signal : VWD1A, Wavelength=254 nm

| Ret time [min] | Width [min] | Height  | Area     | Area % |
|----------------|-------------|---------|----------|--------|
| 18.29          | 2.26        | 24.13   | 1136.15  | 1.36   |
| 20.01          | 2.41        | 5.95    | 306.24   | 0.37   |
| 26.13          | 5.63        | 1299.30 | 76705.31 | 91.64  |
| 28.48          | 6.49        | 85.30   | 5553.81  | 6.64   |

## HPLC spectra for racemic and chiral product 3ac

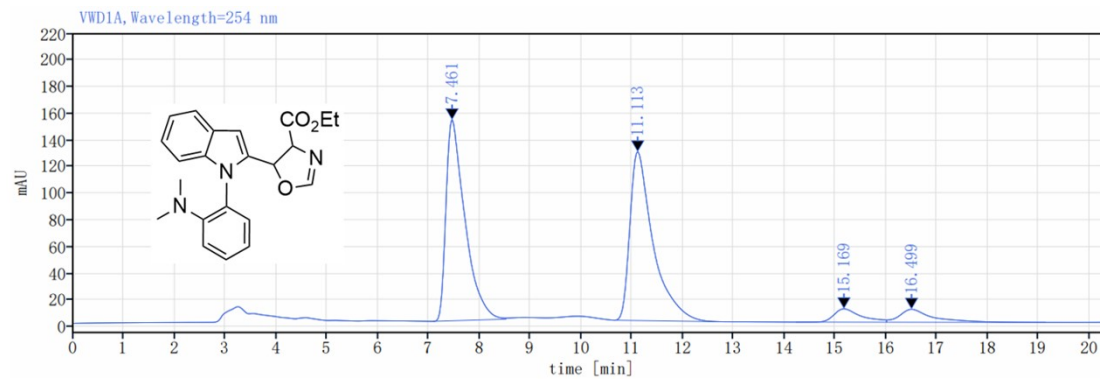

signal : VWD1A, Wavelength=254 nm

| Ret time [min] | Width [min] | Height | Area    | Area % |
|----------------|-------------|--------|---------|--------|
| 7.46           | 1.43        | 150.67 | 3894.34 | 44.78  |
| 11.11          | 2.13        | 126.50 | 4008.24 | 46.09  |
| 15.17          | 1.79        | 9.97   | 364.52  | 4.19   |
| 16.50          | 3.13        | 9.67   | 430.23  | 4.95   |

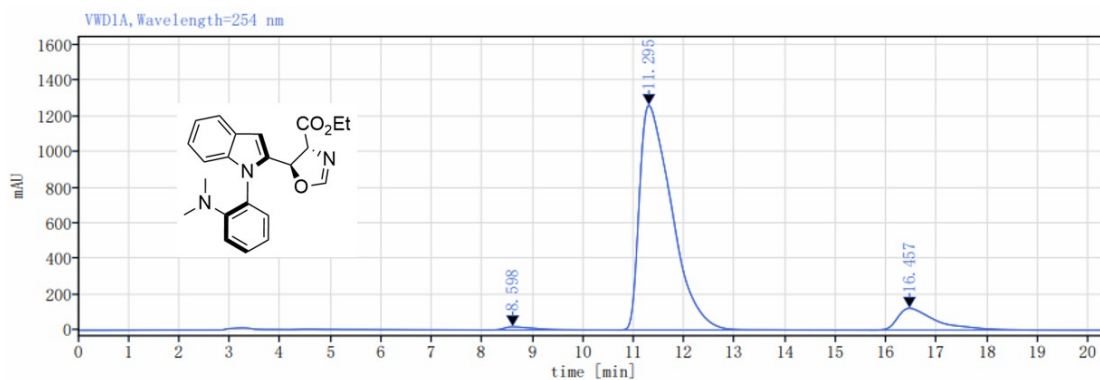

signal : VWD1A, Wavelength=254 nm

| Ret time [min] | Width [min] | Height  | Area     | Area % |
|----------------|-------------|---------|----------|--------|
| 8.60           | 2.57        | 18.13   | 754.23   | 1.19   |
| 11.30          | 3.84        | 1261.33 | 55978.90 | 88.65  |
| 16.46          | 5.27        | 122.57  | 6410.36  | 10.15  |

## HPLC spectra for racemic and chiral product 3ad

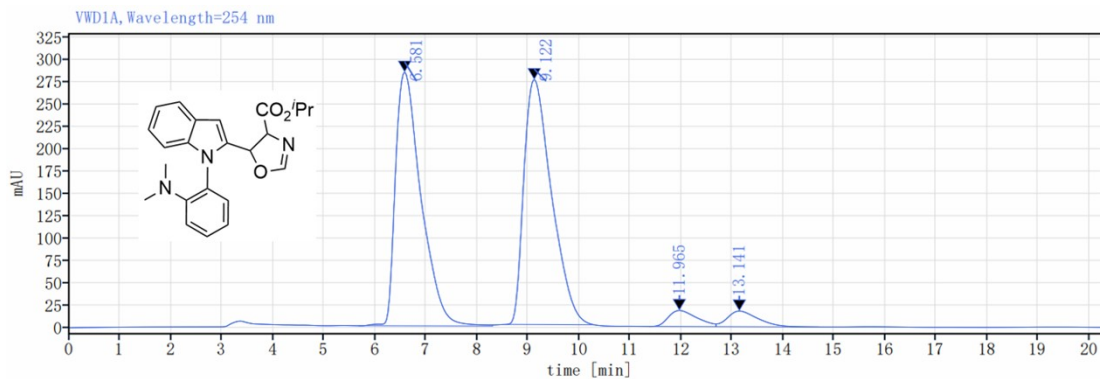

signal : VWD1A, Wavelength=254 nm

| Ret time [min] | Width [min] | Height | Area     | Area % |
|----------------|-------------|--------|----------|--------|
| 6.58           | 2.63        | 283.94 | 9886.35  | 45.66  |
| 9.12           | 1.71        | 274.17 | 10349.25 | 47.80  |
| 11.96          | 1.31        | 17.84  | 688.00   | 3.18   |
| 13.14          | 2.02        | 17.48  | 726.19   | 3.35   |

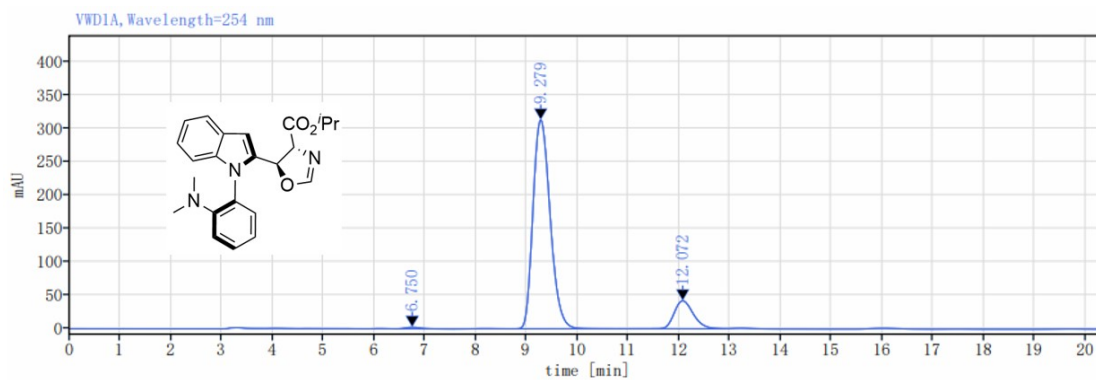

signal : VWD1A, Wavelength=254 nm

| Ret time [min] | Width [min] | Height | Area    | Area % |
|----------------|-------------|--------|---------|--------|
| 6.75           | 1.19        | 2.58   | 56.69   | 0.66   |
| 9.28           | 2.00        | 313.73 | 7364.21 | 86.36  |
| 12.07          | 1.43        | 42.11  | 1106.37 | 12.97  |

## HPLC spectra for racemic and chiral product 3ae

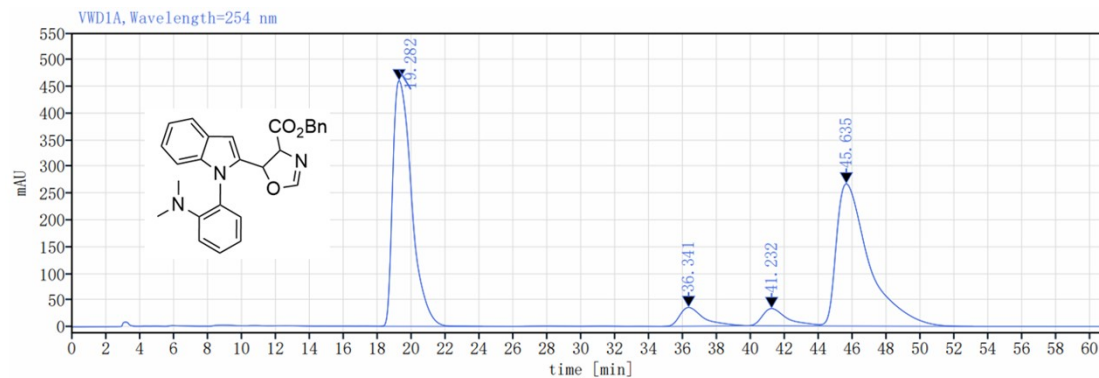

signal : VWD1A, Wavelength=254 nm

| Ret time [min] | Width [min] | Height | Area     | Area % |
|----------------|-------------|--------|----------|--------|
| 19.28          | 5.99        | 459.70 | 35444.22 | 45.54  |
| 36.34          | 4.99        | 35.10  | 3425.82  | 4.40   |
| 41.23          | 4.26        | 32.34  | 3252.16  | 4.18   |
| 45.63          | 9.06        | 266.21 | 35710.98 | 45.88  |

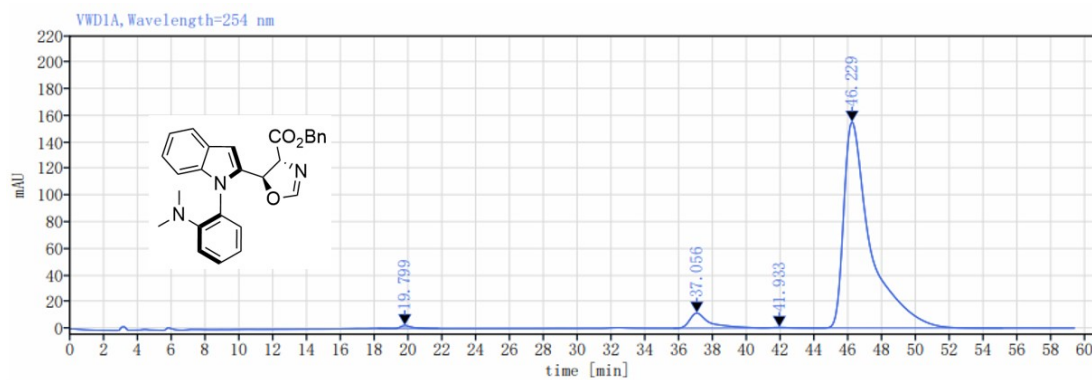

signal : VWD1A, Wavelength=254 nm

| Ret time [min] | Width [min] | Height | Area     | Area % |
|----------------|-------------|--------|----------|--------|
| 19.80          | 3.59        | 2.18   | 99.64    | 0.55   |
| 37.06          | 5.24        | 11.35  | 945.60   | 5.21   |
| 41.93          | 3.47        | 0.51   | 42.90    | 0.24   |
| 46.23          | 10.75       | 154.68 | 17063.90 | 94.01  |

## HPLC spectra for racemic and chiral product 3af

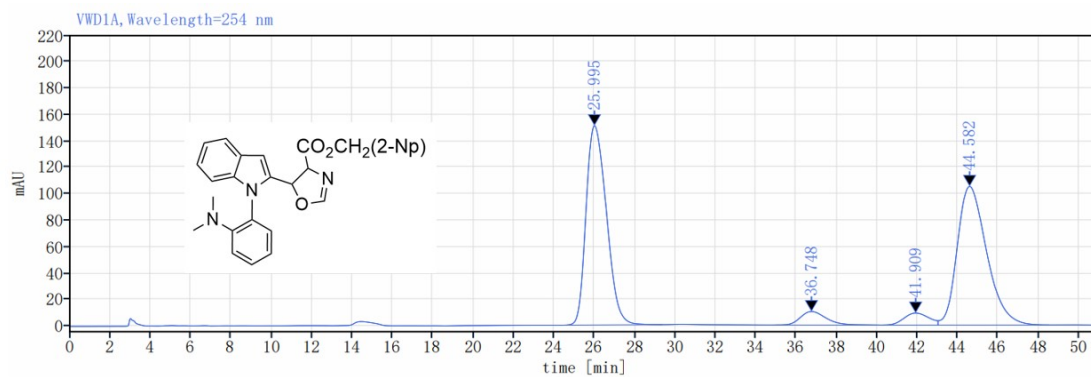

signal : VWD1A, Wavelength=254 nm

| Ret time [min] | Width [min] | Height | Area     | Area % |
|----------------|-------------|--------|----------|--------|
| 26.00          | 5.05        | 150.71 | 10569.34 | 46.23  |
| 36.75          | 5.20        | 10.18  | 898.63   | 3.93   |
| 41.91          | 2.77        | 9.05   | 774.13   | 3.39   |
| 44.58          | 5.53        | 104.83 | 10619.53 | 46.45  |

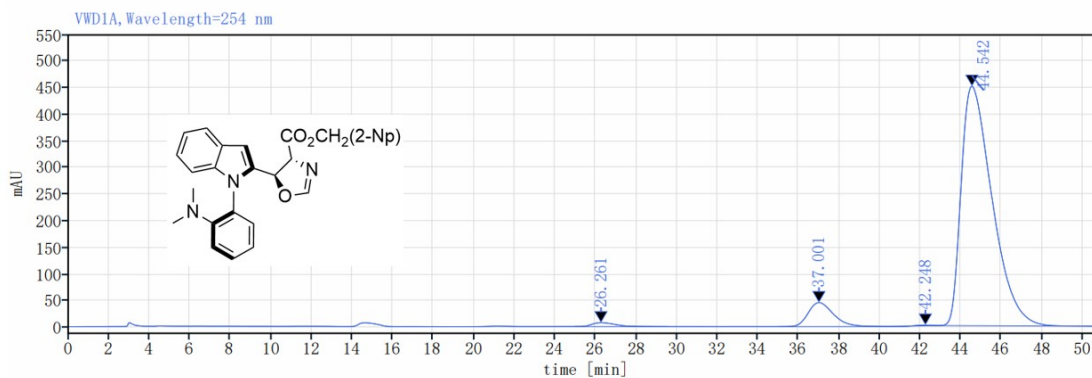

signal : VWD1A, Wavelength=254 nm

| Ret time [min] | Width [min] | Height | Area     | Area % |
|----------------|-------------|--------|----------|--------|
| 26.26          | 4.62        | 7.14   | 574.82   | 1.10   |
| 37.00          | 5.52        | 44.87  | 3874.92  | 7.42   |
| 42.25          | 2.35        | 1.31   | 64.35    | 0.12   |
| 44.54          | 10.39       | 449.38 | 47725.47 | 91.36  |

## HPLC spectra for racemic and chiral product 5aa

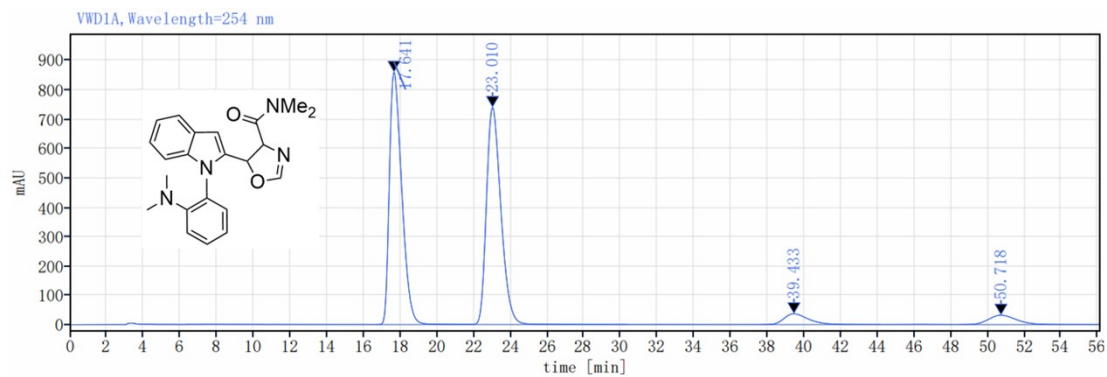

signal : VWD1A, Wavelength=254 nm

| Ret time [min] | Width [min] | Height | Area     | Area % |
|----------------|-------------|--------|----------|--------|
| 17.64          | 5.12        | 857.35 | 40349.79 | 46.08  |
| 23.01          | 8.58        | 737.57 | 40498.31 | 46.25  |
| 39.43          | 6.55        | 36.30  | 3359.08  | 3.84   |
| 50.72          | 8.04        | 31.67  | 3352.22  | 3.83   |

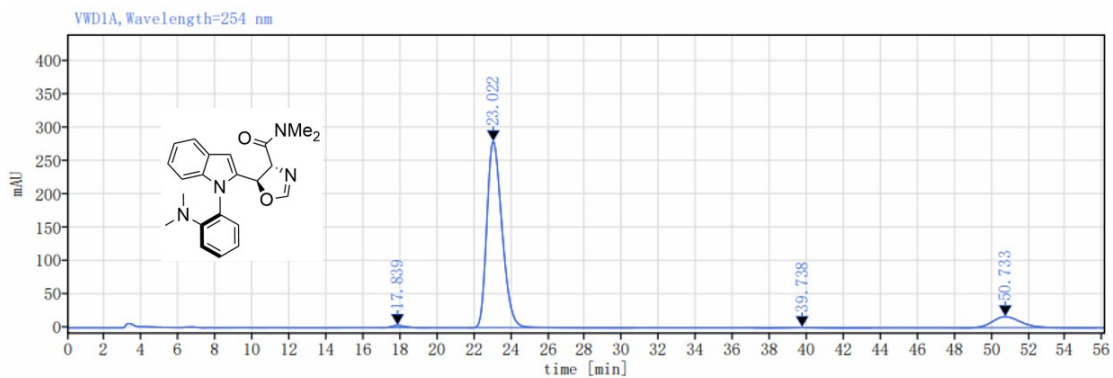

signal : VWD1A, Wavelength=254 nm

| Ret time [min] | Width [min] | Height | Area     | Area % |
|----------------|-------------|--------|----------|--------|
| 17.84          | 2.67        | 3.38   | 167.55   | 0.93   |
| 23.02          | 9.02        | 279.63 | 15995.83 | 88.77  |
| 39.74          | 6.34        | 0.55   | 51.10    | 0.28   |
| 50.73          | 7.37        | 16.74  | 1804.65  | 10.02  |

## HPLC spectra for racemic and chiral product 5ab

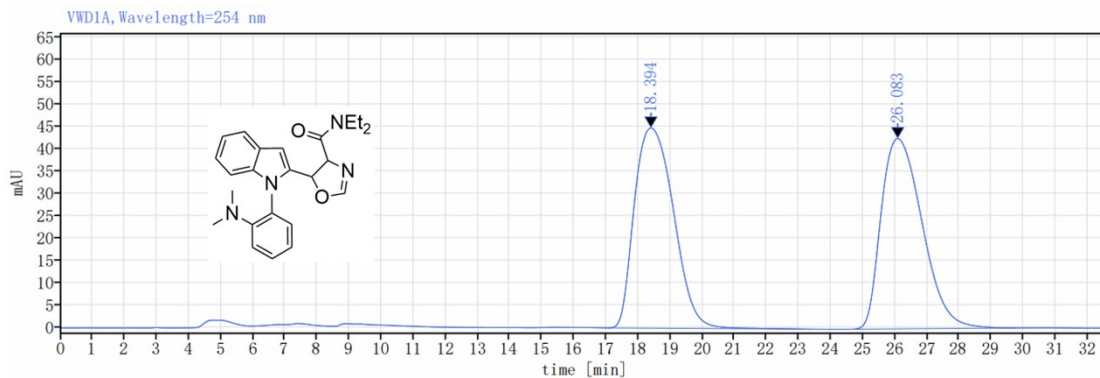

signal : VWD1A, Wavelength=254 nm

| Ret time [min] | Width [min] | Height | Area    | Area % |
|----------------|-------------|--------|---------|--------|
| 18.39          | 6.41        | 44.87  | 3820.76 | 50.18  |
| 26.08          | 5.16        | 42.65  | 3793.81 | 49.82  |

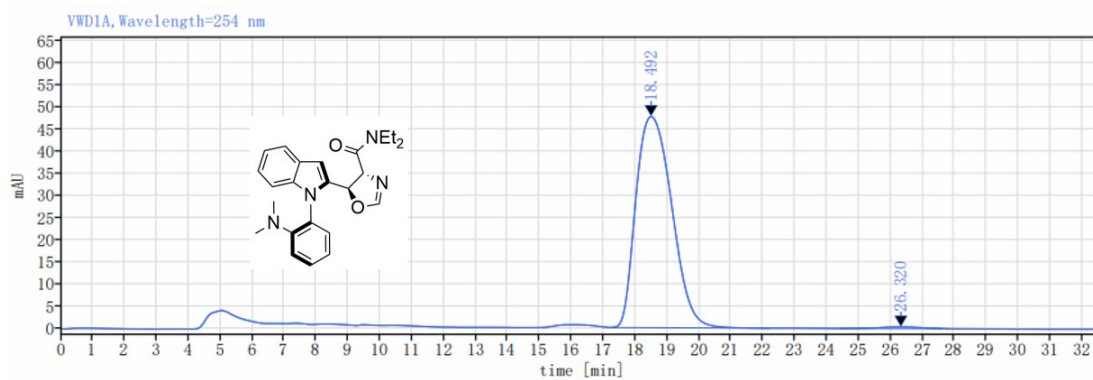

signal : VWD1A, Wavelength=254 nm

| Ret time [min] | Width [min] | Height | Area    | Area % |
|----------------|-------------|--------|---------|--------|
| 18.49          | 4.97        | 47.74  | 3734.50 | 99.14  |
| 26.32          | 3.23        | 0.36   | 32.58   | 0.86   |

## HPLC spectra for racemic and chiral product 5ac

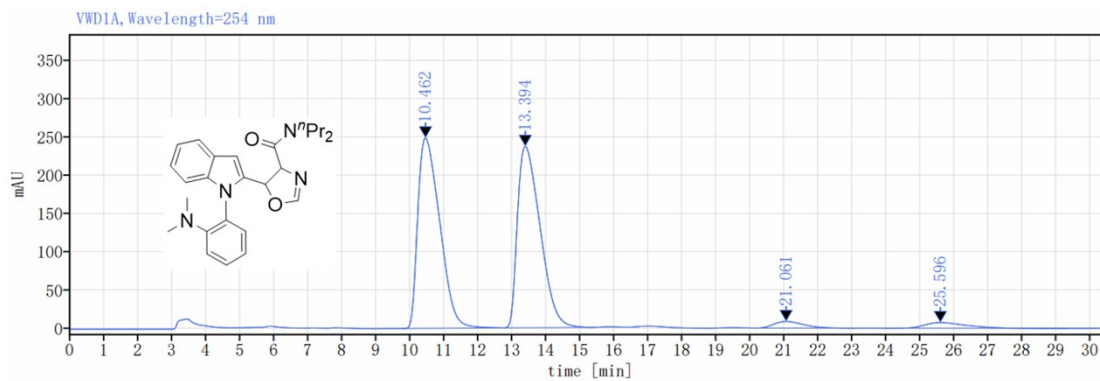

signal : VWD1A, Wavelength=254 nm

| Ret time [min] | Width [min] | Height | Area     | Area % |
|----------------|-------------|--------|----------|--------|
| 10.46          | 2.94        | 249.07 | 11108.62 | 47.79  |
| 13.39          | 2.64        | 237.18 | 10970.67 | 47.20  |
| 21.06          | 2.95        | 8.67   | 529.20   | 2.28   |
| 25.60          | 5.40        | 7.44   | 634.32   | 2.73   |

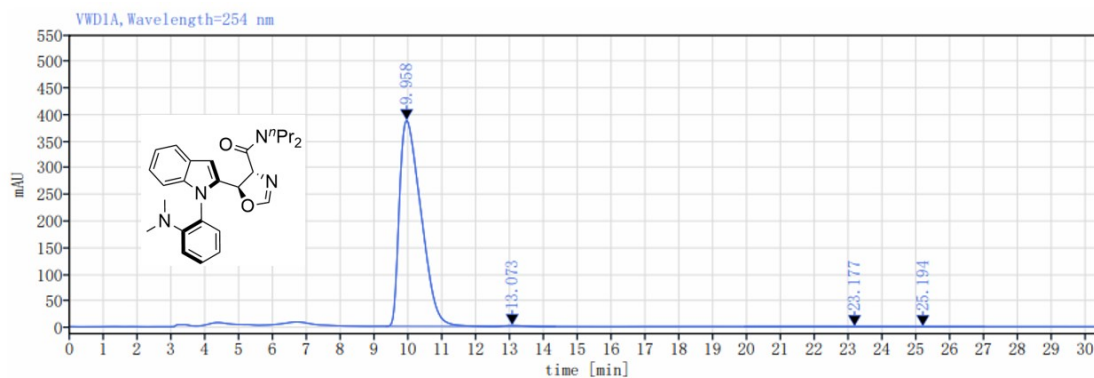

signal : VWD1A, Wavelength=254 nm

| Ret time [min] | Width [min] | Height | Area     | Area % |
|----------------|-------------|--------|----------|--------|
| 9.96           | 3.16        | 386.04 | 17096.74 | 99.56  |
| 13.07          | 1.86        | 1.68   | 72.13    | 0.42   |
| 23.18          | 3.85        | 0.01   | 1.05     | 0.01   |
| 25.19          | 3.27        | 0.03   | 1.67     | 0.01   |

## HPLC spectra for racemic and chiral product 5ad

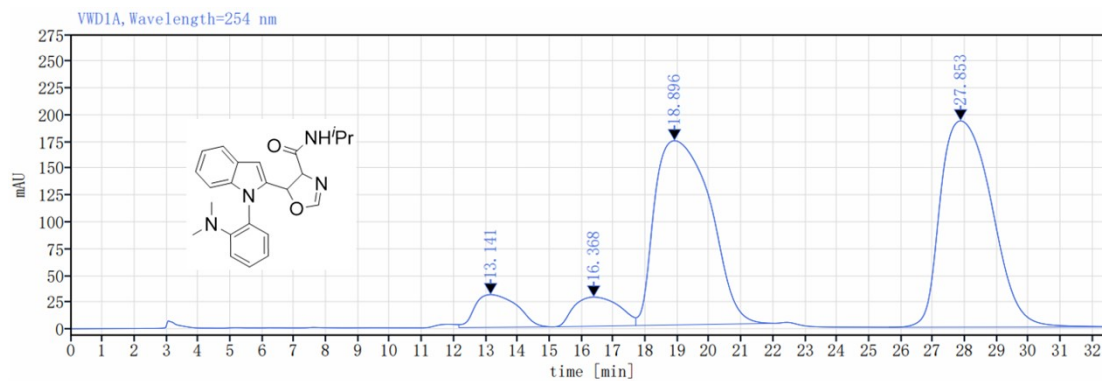

signal : VWD1A, Wavelength=254 nm

| Ret time [min] | Width [min] | Height | Area     | Area % |
|----------------|-------------|--------|----------|--------|
| 13.14          | 2.94        | 30.52  | 2800.24  | 5.85   |
| 16.37          | 2.58        | 27.18  | 2695.47  | 5.63   |
| 18.90          | 4.33        | 171.90 | 20845.89 | 43.54  |
| 27.85          | 7.52        | 192.47 | 21534.39 | 44.98  |

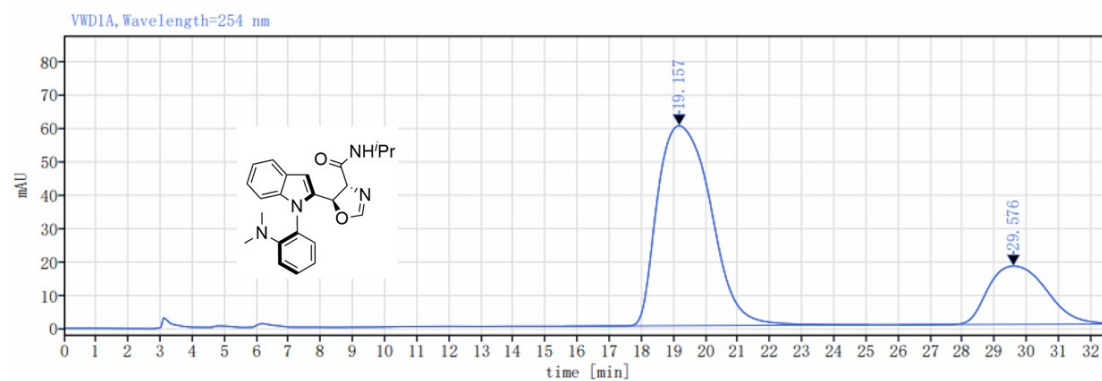

signal : VWD1A, Wavelength=254 nm

| Ret time [min] | Width [min] | Height | Area    | Area % |
|----------------|-------------|--------|---------|--------|
| 19.16          | 9.48        | 59.91  | 6934.78 | 75.77  |
| 29.58          | 7.83        | 17.46  | 2217.78 | 24.23  |

## HPLC spectra for racemic and chiral product 5ae

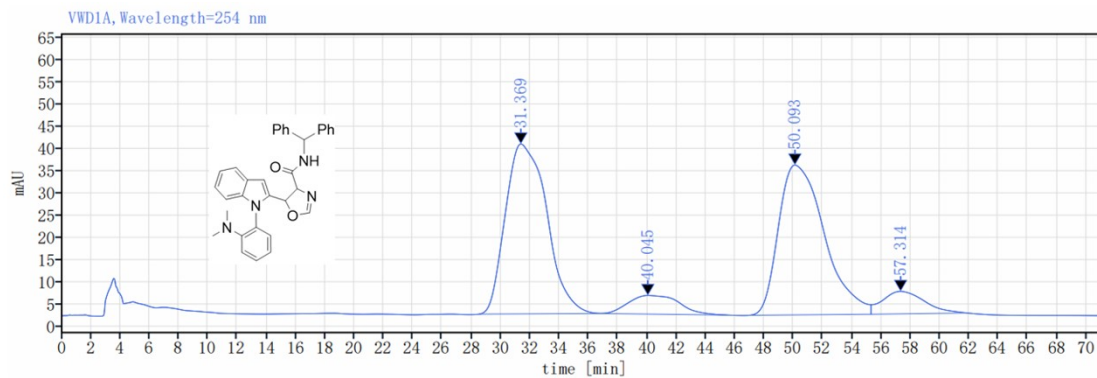

signal : VWD1A, Wavelength=254 nm

| Ret time [min] | Width [min] | Height | Area    | Area % |
|----------------|-------------|--------|---------|--------|
| 31.37          | 8.28        | 38.23  | 7507.28 | 44.47  |
| 40.05          | 8.65        | 4.18   | 1009.54 | 5.98   |
| 50.09          | 8.31        | 33.72  | 7354.89 | 43.57  |
| 57.31          | 6.56        | 5.04   | 1009.53 | 5.98   |

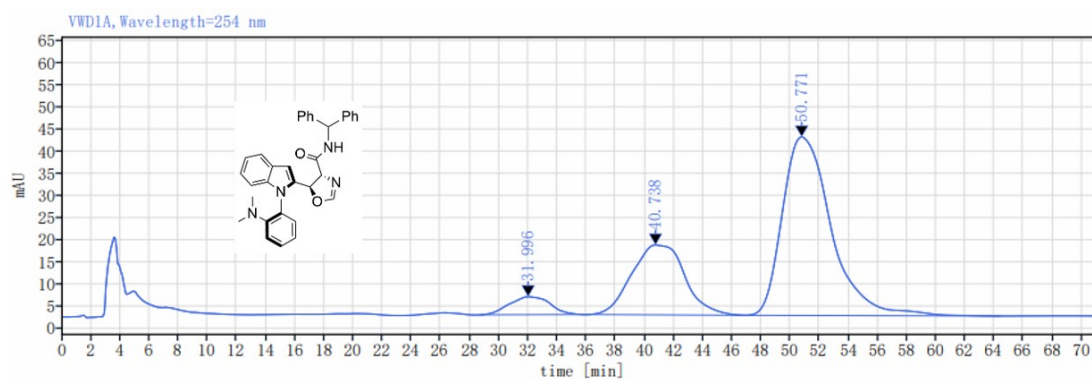

signal : VWD1A, Wavelength=254 nm

| Ret time [min] | Width [min] | Height | Area    | Area % |
|----------------|-------------|--------|---------|--------|
| 32.00          | 7.42        | 4.07   | 785.78  | 5.53   |
| 40.74          | 10.75       | 15.79  | 4003.33 | 28.17  |
| 50.77          | 17.57       | 40.35  | 9421.69 | 66.30  |

## HPLC spectra for racemic and chiral product 5af

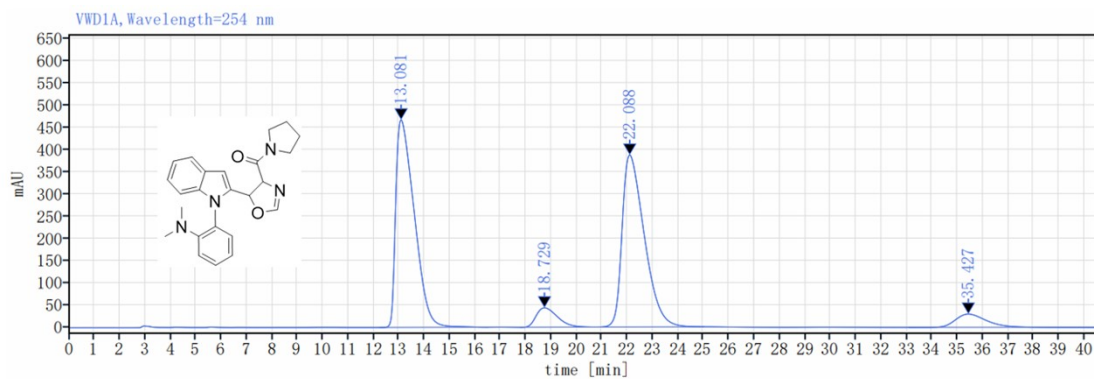

signal : VWD1A, Wavelength=254 nm

| Ret time [min] | Width [min] | Height | Area     | Area % |
|----------------|-------------|--------|----------|--------|
| 13.08          | 4.30        | 467.69 | 23630.79 | 45.23  |
| 18.73          | 2.96        | 43.83  | 2557.06  | 4.89   |
| 22.09          | 4.27        | 387.36 | 23472.45 | 44.93  |
| 35.43          | 7.68        | 30.07  | 2581.96  | 4.94   |

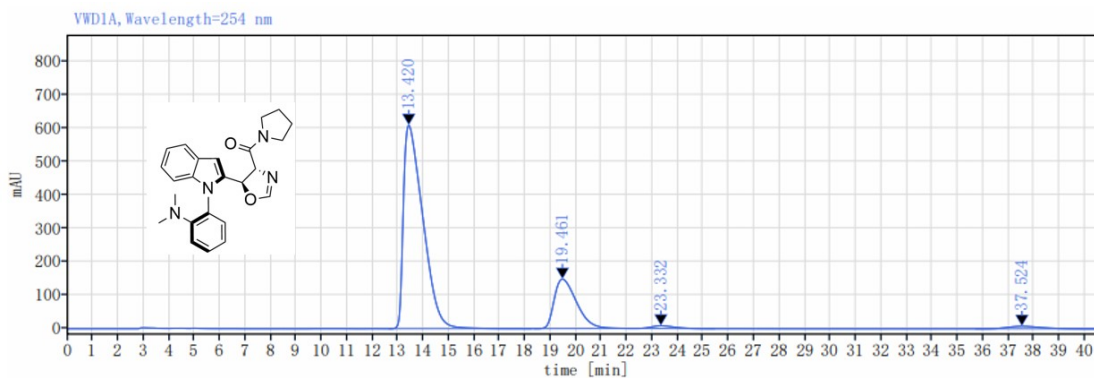

signal : VWD1A, Wavelength=254 nm

| Ret time [min] | Width [min] | Height | Area     | Area % |
|----------------|-------------|--------|----------|--------|
| 13.42          | 5.62        | 610.38 | 32408.66 | 75.95  |
| 19.46          | 3.95        | 148.19 | 9042.06  | 21.19  |
| 23.33          | 3.17        | 8.29   | 522.36   | 1.22   |
| 37.52          | 6.61        | 7.69   | 696.68   | 1.63   |

## HPLC spectra for racemic and chiral product 5ag

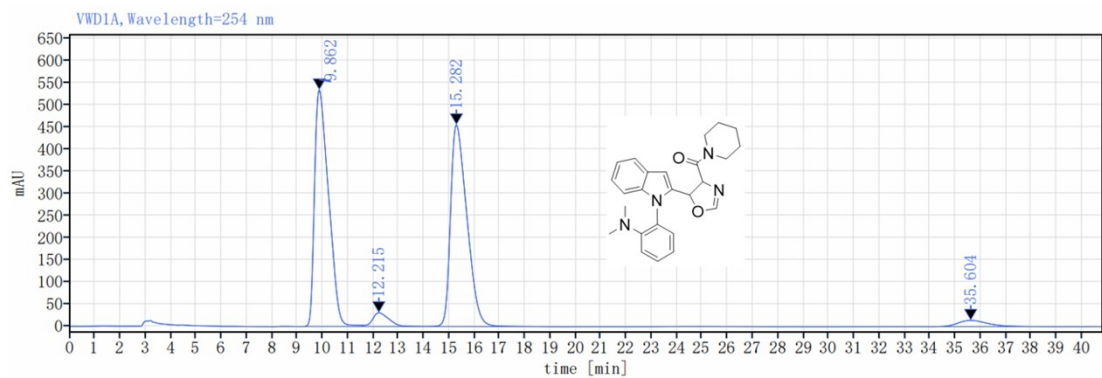

signal : VWD1A, Wavelength=254 nm

| Ret time [min] | Width [min] | Height | Area     | Area % |
|----------------|-------------|--------|----------|--------|
| 9.86           | 2.28        | 534.77 | 20479.86 | 47.09  |
| 12.22          | 2.26        | 31.08  | 1378.73  | 3.17   |
| 15.28          | 5.88        | 456.13 | 20447.78 | 47.02  |
| 35.60          | 6.75        | 14.27  | 1179.93  | 2.71   |

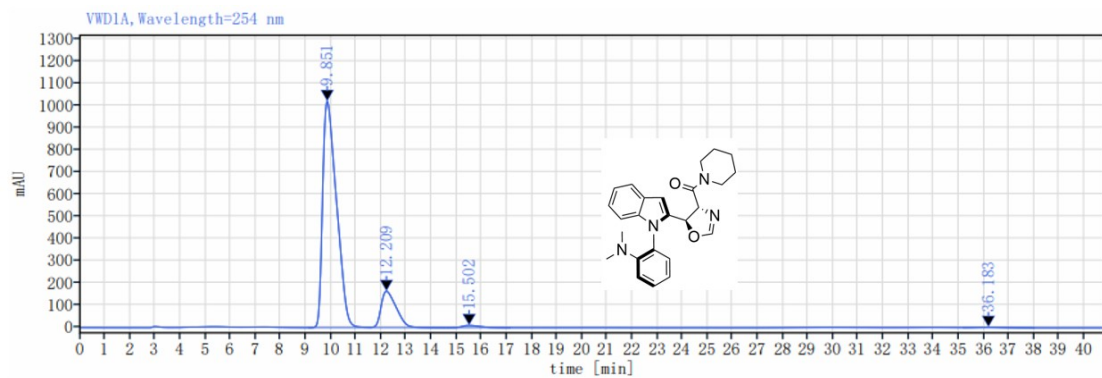

signal : VWD1A, Wavelength=254 nm

| Ret time [min] | Width [min] | Height  | Area     | Area % |
|----------------|-------------|---------|----------|--------|
| 9.85           | 2.45        | 1022.23 | 39154.62 | 83.87  |
| 12.21          | 3.02        | 164.35  | 6898.81  | 14.78  |
| 15.50          | 2.58        | 10.27   | 482.13   | 1.03   |
| 36.18          | 2.88        | 2.08    | 151.56   | 0.32   |

## HPLC spectra for racemic and chiral product 5ah

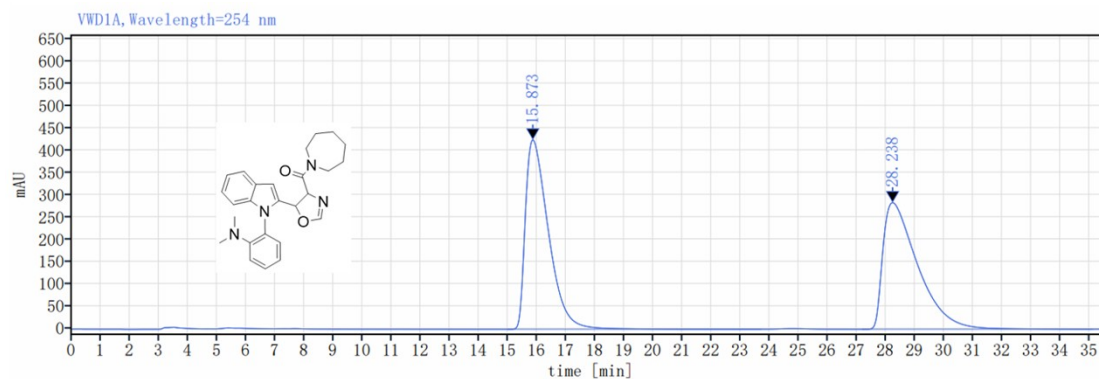

signal : VWD1A, Wavelength=254 nm

| Ret time [min] | Width [min] | Height | Area     | Area % |
|----------------|-------------|--------|----------|--------|
| 15.87          | 8.73        | 425.67 | 23519.74 | 49.84  |
| 28.24          | 7.93        | 284.61 | 23671.86 | 50.16  |

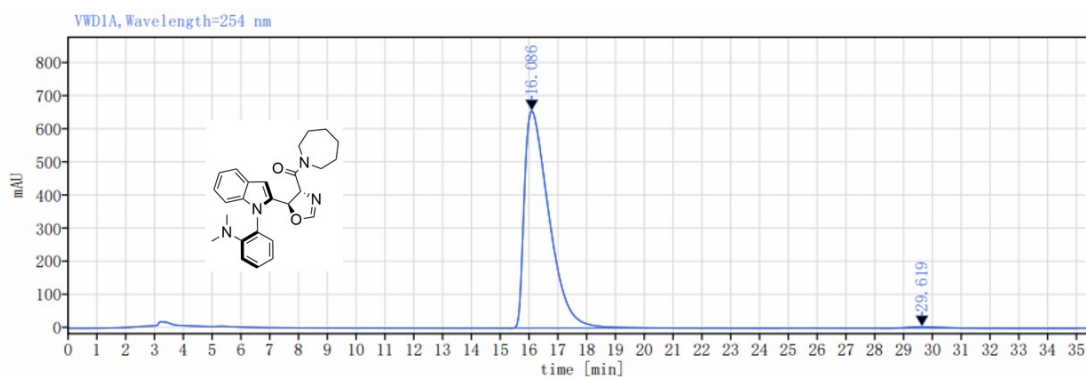

signal : VWD1A, Wavelength=254 nm

| Ret time [min] | Width [min] | Height | Area     | Area % |
|----------------|-------------|--------|----------|--------|
| 16.09          | 9.52        | 656.68 | 39167.47 | 99.07  |
| 29.62          | 6.87        | 4.39   | 369.15   | 0.93   |

## HPLC spectra for racemic and chiral product 5ai

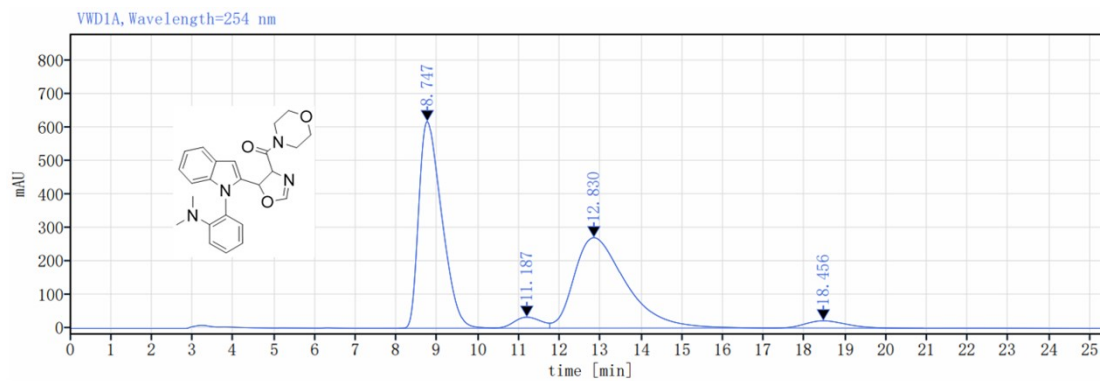

signal : VWD1A, Wavelength=254 nm

| Ret time [min] | Width [min] | Height | Area     | Area % |
|----------------|-------------|--------|----------|--------|
| 8.75           | 2.35        | 618.54 | 24218.84 | 47.30  |
| 11.19          | 1.36        | 32.97  | 1531.75  | 2.99   |
| 12.83          | 5.45        | 270.81 | 23899.90 | 46.68  |
| 18.46          | 3.71        | 21.85  | 1553.96  | 3.03   |

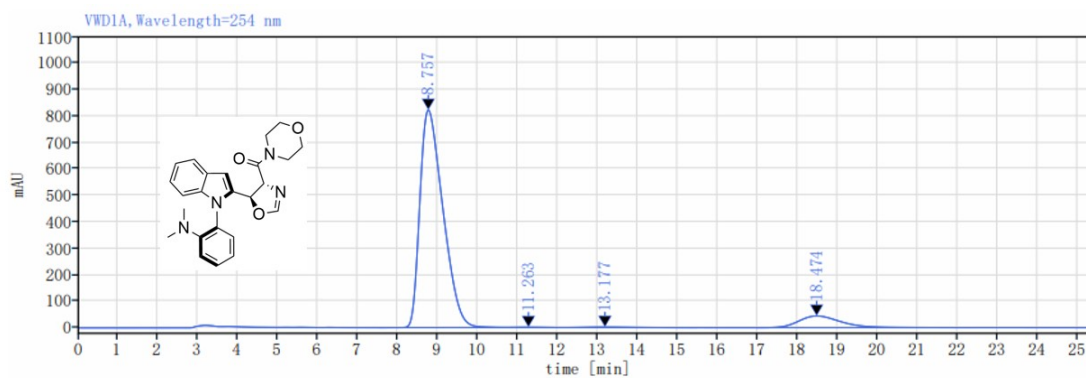

signal : VWD1A, Wavelength=254 nm

| Ret time [min] | Width [min] | Height | Area     | Area % |
|----------------|-------------|--------|----------|--------|
| 8.76           | 3.15        | 822.11 | 32859.71 | 90.58  |
| 11.26          | 1.44        | 0.81   | 34.50    | 0.10   |
| 13.18          | 3.34        | 1.79   | 140.61   | 0.39   |
| 18.47          | 5.44        | 44.31  | 3241.13  | 8.93   |

## HPLC spectra for racemic and chiral product 5aj

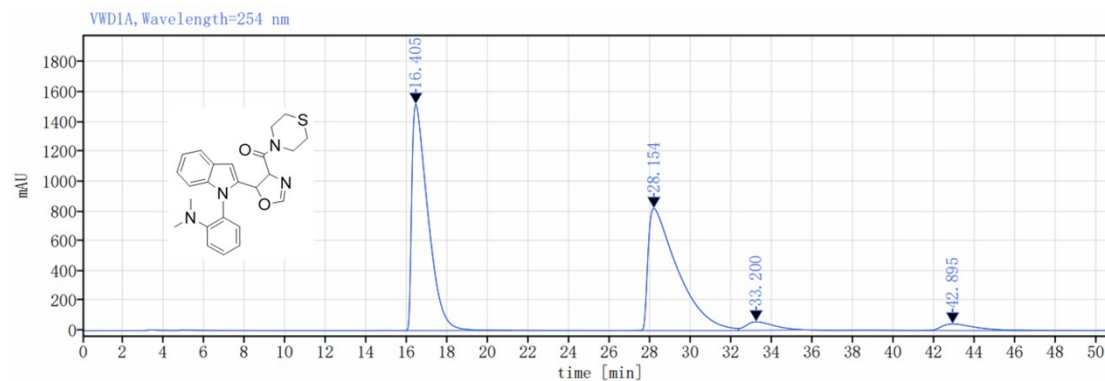

signal : VWD1A, Wavelength=254 nm

| Ret time [min] | Width [min] | Height  | Area     | Area % |
|----------------|-------------|---------|----------|--------|
| 16.40          | 5.50        | 1517.84 | 84088.20 | 47.15  |
| 28.15          | 5.39        | 819.49  | 83250.07 | 46.68  |
| 33.20          | 3.40        | 58.15   | 5606.62  | 3.14   |
| 42.89          | 7.97        | 44.98   | 5378.44  | 3.02   |

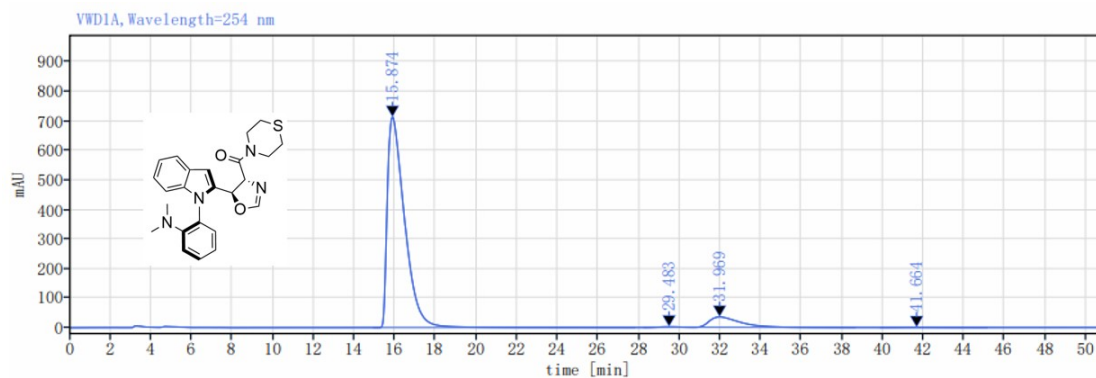

signal : VWD1A, Wavelength=254 nm

| Ret time [min] | Width [min] | Height | Area     | Area % |
|----------------|-------------|--------|----------|--------|
| 15.87          | 12.89       | 711.61 | 41929.56 | 91.49  |
| 29.48          | 2.47        | 2.01   | 142.70   | 0.31   |
| 31.97          | 7.98        | 34.94  | 3698.98  | 8.07   |
| 41.66          | 5.30        | 0.47   | 58.97    | 0.13   |

## HPLC spectra for racemic and chiral product 5ak

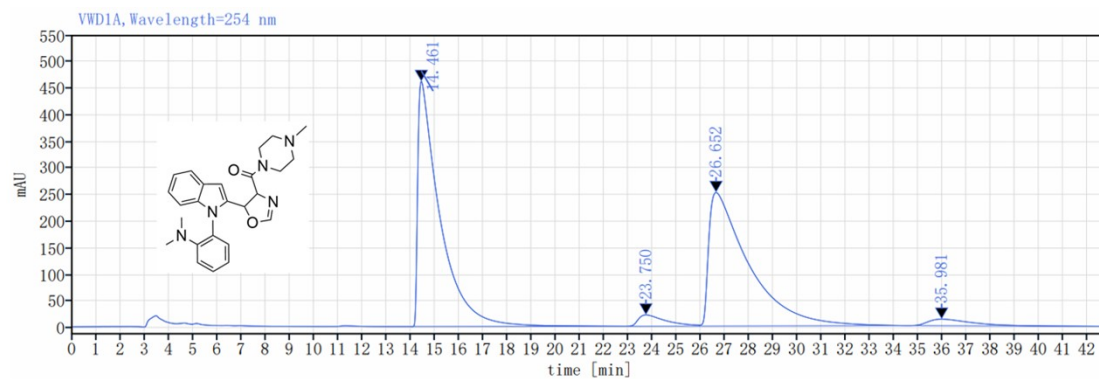

signal : VWD1A, Wavelength=254 nm

| Ret time [min] | Width [min] | Height | Area     | Area % |
|----------------|-------------|--------|----------|--------|
| 14.46          | 8.83        | 460.30 | 29130.04 | 47.68  |
| 23.75          | 3.07        | 21.23  | 1662.87  | 2.72   |
| 26.65          | 8.64        | 250.83 | 28728.48 | 47.02  |
| 35.98          | 7.97        | 12.46  | 1574.87  | 2.58   |

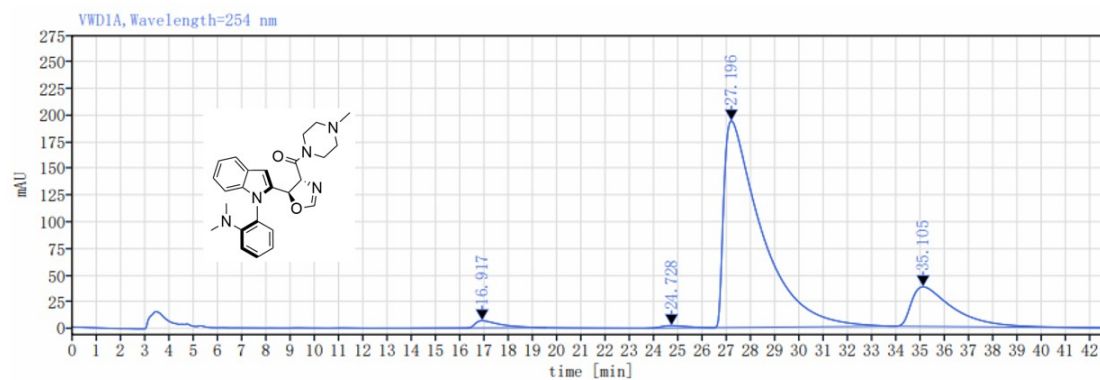

signal : VWD1A, Wavelength=254 nm

| Ret time [min] | Width [min] | Height | Area     | Area % |
|----------------|-------------|--------|----------|--------|
| 16.92          | 5.60        | 6.72   | 472.19   | 1.82   |
| 24.73          | 2.77        | 2.23   | 162.65   | 0.63   |
| 27.20          | 7.45        | 193.61 | 20927.40 | 80.57  |
| 35.10          | 8.71        | 37.14  | 4413.13  | 16.99  |

## HPLC spectra for racemic and chiral product 5aI

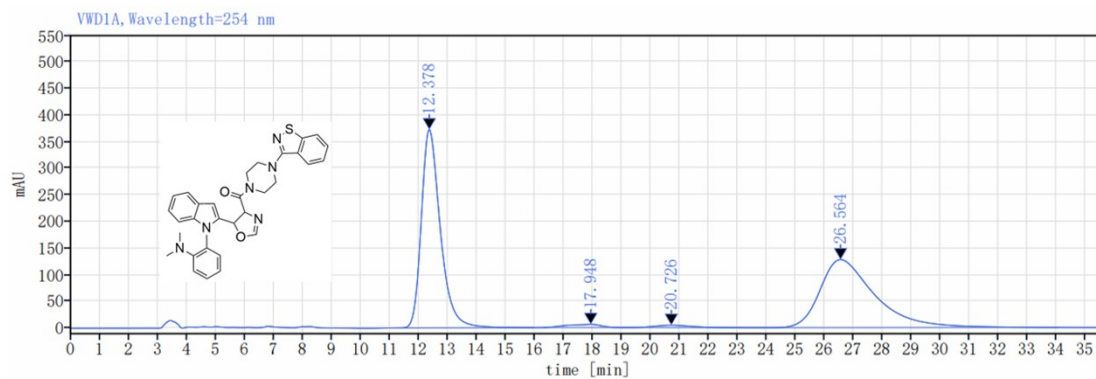

signal : VWD1A, Wavelength=254 nm

| Ret time [min] | Width [min] | Height | Area     | Area % |
|----------------|-------------|--------|----------|--------|
| 12.38          | 4.75        | 372.49 | 16961.38 | 49.07  |
| 17.95          | 2.89        | 5.83   | 480.55   | 1.39   |
| 20.73          | 4.49        | 4.35   | 392.21   | 1.13   |
| 26.56          | 10.39       | 127.68 | 16733.16 | 48.41  |

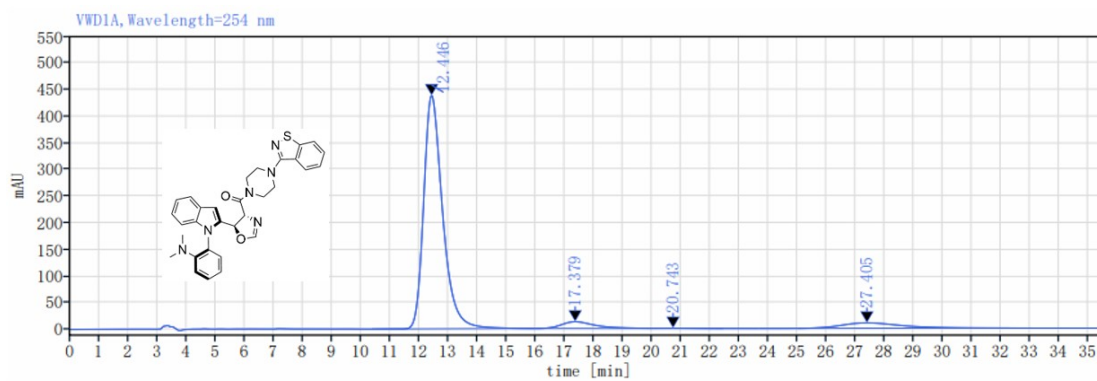

signal : VWD1A, Wavelength=254 nm

| Ret time [min] | Width [min] | Height | Area     | Area % |
|----------------|-------------|--------|----------|--------|
| 12.45          | 5.59        | 437.63 | 19811.92 | 88.70  |
| 17.38          | 3.94        | 12.60  | 1017.35  | 4.55   |
| 20.74          | 2.50        | 0.55   | 51.14    | 0.23   |
| 27.40          | 7.28        | 10.13  | 1455.61  | 6.52   |

## HPLC spectra for racemic and chiral product 5am

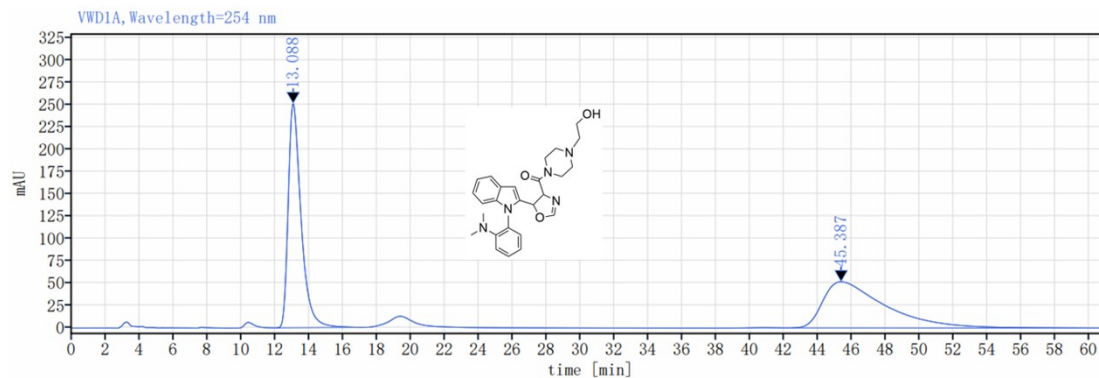

signal : VWD1A, Wavelength=254 nm

| Ret time [min] | Width [min] | Height | Area     | Area % |
|----------------|-------------|--------|----------|--------|
| 13.09          | 5.11        | 251.73 | 13251.34 | 49.94  |
| 45.39          | 20.35       | 51.89  | 13282.53 | 50.06  |

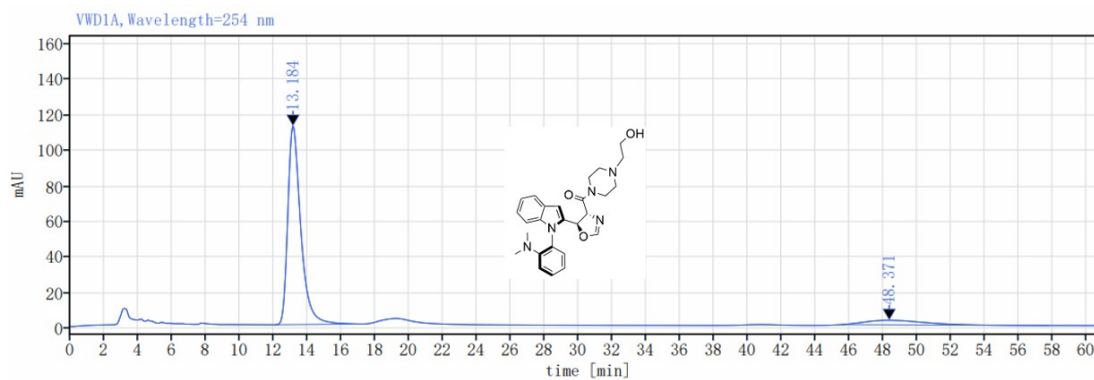

signal : VWD1A, Wavelength=254 nm

| Ret time [min] | Width [min] | Height | Area    | Area % |
|----------------|-------------|--------|---------|--------|
| 13.18          | 5.13        | 111.72 | 5969.25 | 90.60  |
| 48.37          | 12.24       | 2.54   | 618.98  | 9.40   |

## HPLC spectra for racemic and chiral product 6aa

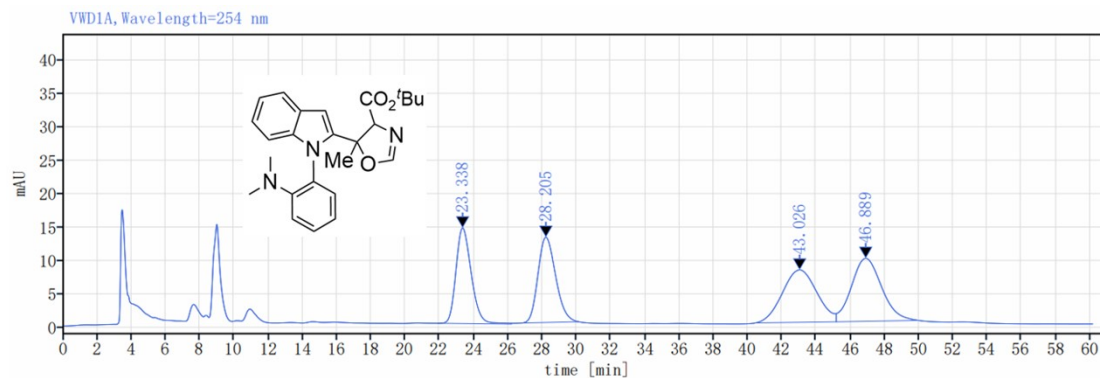

signal : VWD1A, Wavelength=254 nm

| Ret time [min] | Width [min] | Height | Area    | Area % |
|----------------|-------------|--------|---------|--------|
| 23.34          | 4.32        | 14.32  | 889.16  | 21.89  |
| 28.20          | 3.33        | 12.77  | 916.12  | 22.56  |
| 43.03          | 4.72        | 7.84   | 1098.53 | 27.05  |
| 46.89          | 4.79        | 9.43   | 1157.55 | 28.50  |

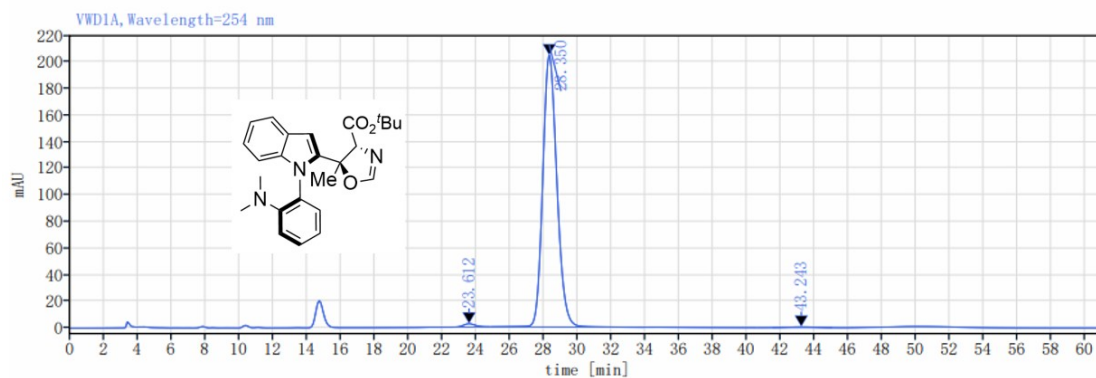

signal : VWD1A, Wavelength=254 nm

| Ret time [min] | Width [min] | Height | Area     | Area % |
|----------------|-------------|--------|----------|--------|
| 23.61          | 2.34        | 2.47   | 117.91   | 0.98   |
| 28.35          | 9.02        | 204.14 | 11848.70 | 98.52  |
| 43.24          | 3.51        | 0.52   | 59.57    | 0.50   |

## HPLC spectra for racemic and chiral product 6ab

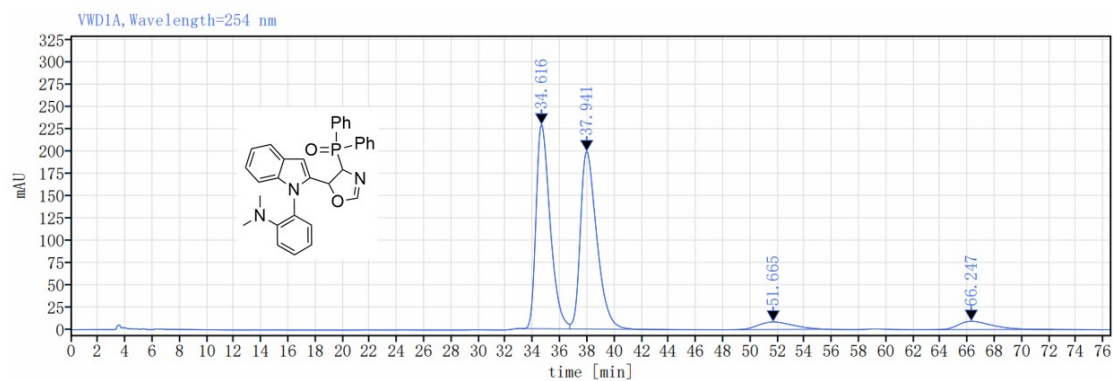

signal : VWD1A, Wavelength=254 nm

| Ret time [min] | Width [min] | Height | Area     | Area % |
|----------------|-------------|--------|----------|--------|
| 34.62          | 3.44        | 228.88 | 16497.49 | 45.29  |
| 37.94          | 7.34        | 199.22 | 16749.62 | 45.98  |
| 51.67          | 7.04        | 8.55   | 1539.64  | 4.23   |
| 66.25          | 8.76        | 9.39   | 1643.19  | 4.51   |

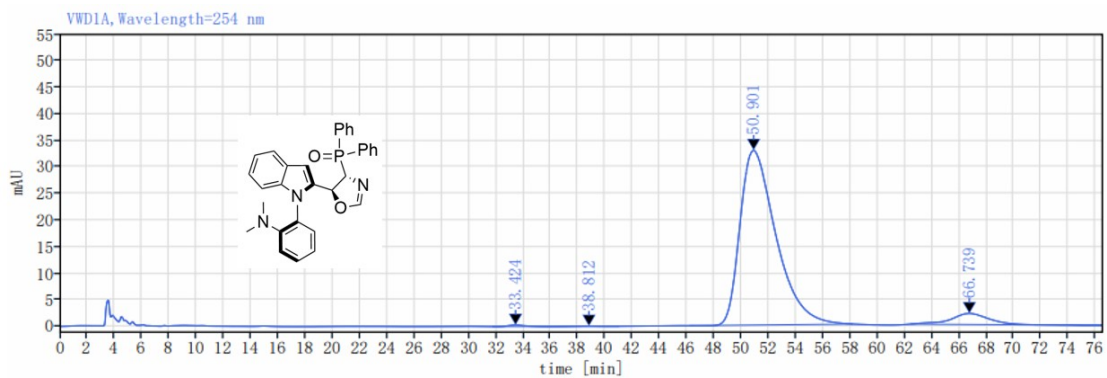

signal : VWD1A, Wavelength=254 nm

| Ret time [min] | Width [min] | Height | Area    | Area % |
|----------------|-------------|--------|---------|--------|
| 33.42          | 4.22        | 0.26   | 22.77   | 0.35   |
| 38.81          | 5.10        | 0.05   | 5.14    | 0.08   |
| 50.90          | 12.00       | 32.88  | 6027.78 | 93.40  |
| 66.74          | 14.46       | 2.06   | 397.92  | 6.17   |

## HPLC spectra for racemic and chiral product 7ab

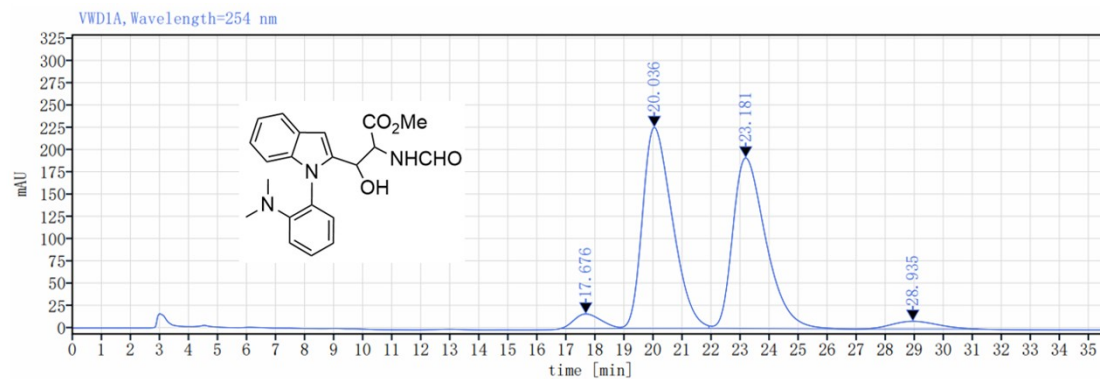

signal : VWD1A, Wavelength=254 nm

| Ret time [min] | Width [min] | Height | Area     | Area % |
|----------------|-------------|--------|----------|--------|
| 17.68          | 2.06        | 16.42  | 1057.98  | 3.17   |
| 20.04          | 3.05        | 225.86 | 16110.25 | 48.29  |
| 23.18          | 5.02        | 191.79 | 15206.23 | 45.58  |
| 28.93          | 4.26        | 8.77   | 983.63   | 2.95   |

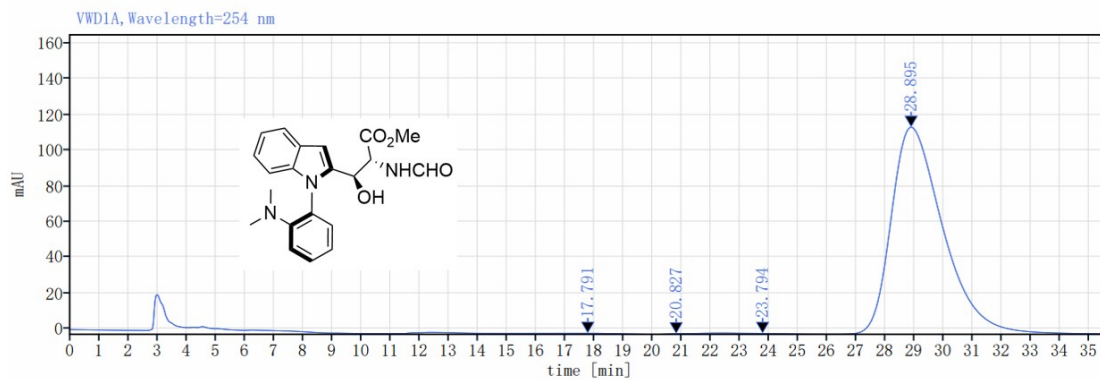

signal : VWD1A, Wavelength=254 nm

| Ret time [min] | Width [min] | Height | Area     | Area % |
|----------------|-------------|--------|----------|--------|
| 17.79          | 5.72        | 0.82   | 221.60   | 1.48   |
| 20.83          | 1.45        | 0.48   | 38.34    | 0.26   |
| 23.79          | 3.02        | 0.54   | 87.83    | 0.59   |
| 28.90          | 10.92       | 116.53 | 14647.08 | 97.68  |

## HPLC spectra for racemic and chiral product 8ab

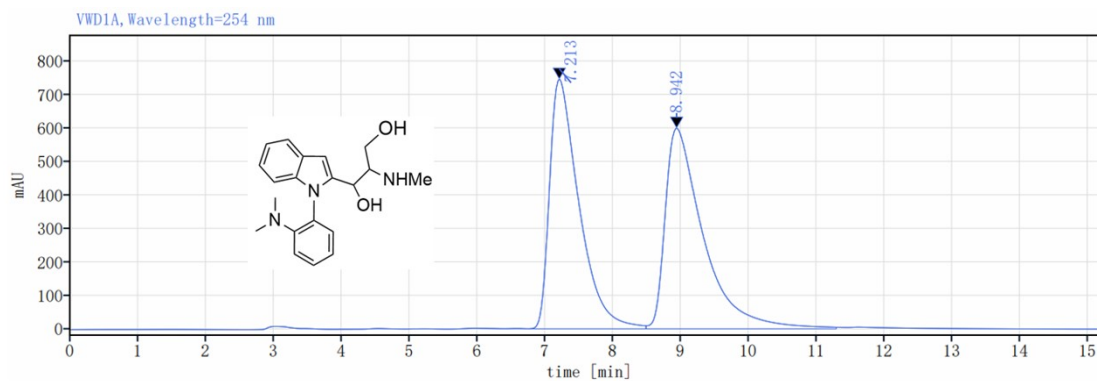

signal : VWD1A, Wavelength=254 nm

| Ret time [min] | Width [min] | Height | Area     | Area % |
|----------------|-------------|--------|----------|--------|
| 7.21           | 1.73        | 745.61 | 22452.11 | 48.96  |
| 8.94           | 2.80        | 599.10 | 23405.04 | 51.04  |

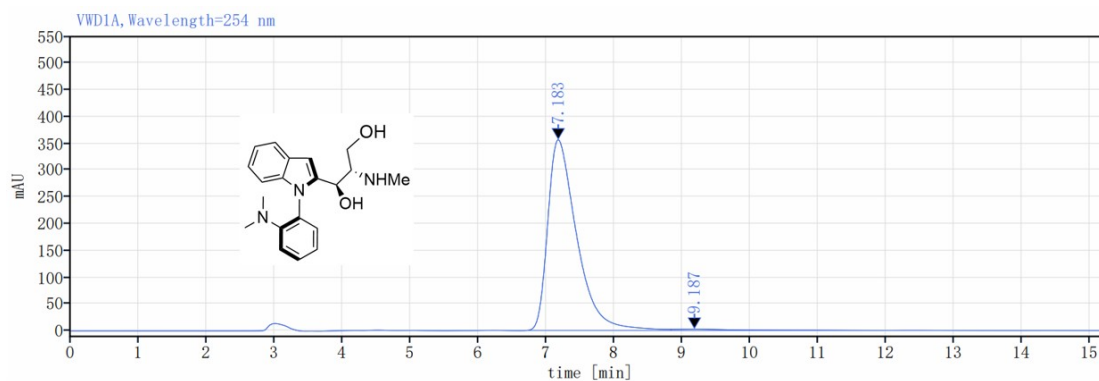

signal : VWD1A, Wavelength=254 nm

| Ret time [min] | Width [min] | Height | Area     | Area % |
|----------------|-------------|--------|----------|--------|
| 7.18           | 2.12        | 356.31 | 10569.14 | 98.18  |
| 9.19           | 3.12        | 2.72   | 195.82   | 1.82   |

## HPLC spectra for racemic and chiral product 3ab (gram-scale synthesis)

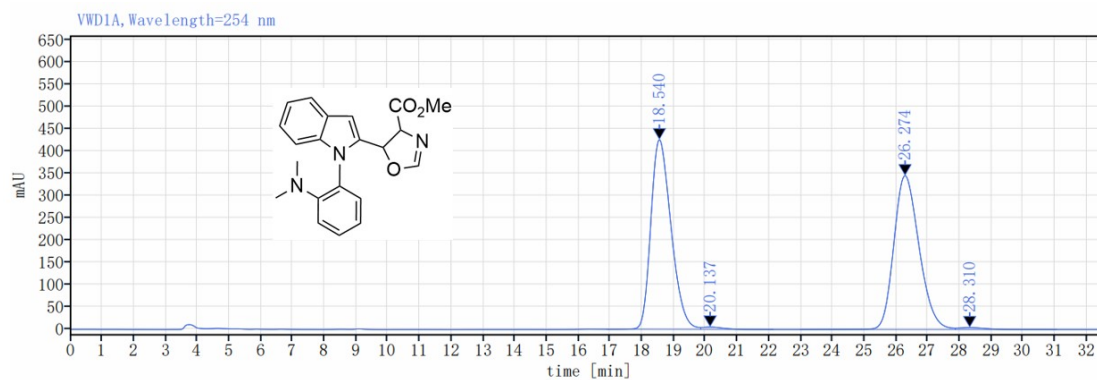

signal : VWD1A, Wavelength=254 nm

| Ret time [min] | Width [min] | Height | Area     | Area % |
|----------------|-------------|--------|----------|--------|
| 18.54          | 2.97        | 426.59 | 18860.46 | 49.06  |
| 20.14          | 2.29        | 5.29   | 238.37   | 0.62   |
| 26.27          | 4.89        | 346.15 | 19093.37 | 49.67  |
| 28.31          | 3.19        | 4.31   | 249.31   | 0.65   |

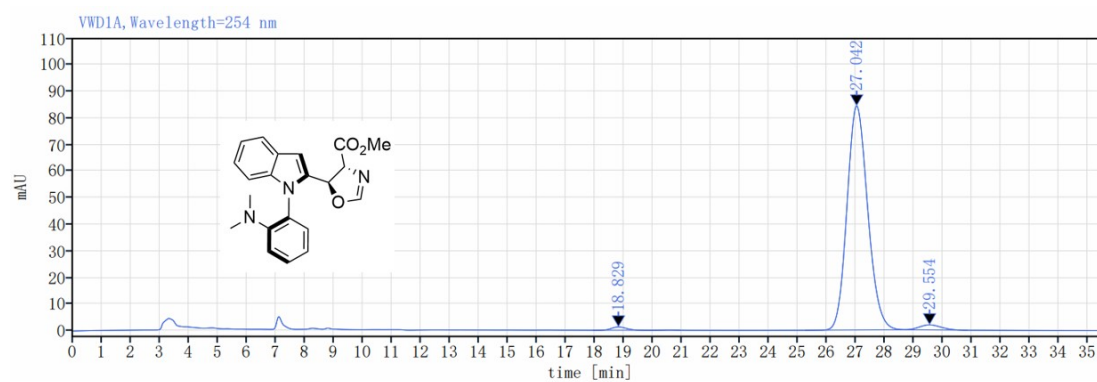

signal : VWD1A, Wavelength=254 nm

| Ret time [min] | Width [min] | Height | Area    | Area % |
|----------------|-------------|--------|---------|--------|
| 18.83          | 3.02        | 1.25   | 45.69   | 1.06   |
| 27.04          | 3.43        | 84.24  | 4183.74 | 96.66  |
| 29.55          | 2.16        | 1.92   | 98.98   | 2.29   |

## 12. Reference

1. Sladojevich, F.; Trabocchi, A.; Guarna, A.; Dixon, D. J. A New Family of Cinchona-Derived Amino Phosphine Precatalysts: Application to the Highly Enantioselective and Diastereoselective Silver-Catalyzed Isocyanoacetate Aldol Reaction. *J. Am. Chem. Soc.* **2011**, *133*, 1710-1713.
2. Jiang, Y.; Zhao, X.; Chen, X.; Deng, Z.; Song, D.; Ling, F.; Zhong, W. Silver-Catalyzed Enantioselective and Diastereoselective Aldol Reaction of  $\alpha$ -Isocyanoacetates with Aldehydes Enabled by Cinchona-Derived Amide Adamantylphosphine Ligands. *J. Org. Chem.* **2026**, *91*, 2983-2990.
3. Zhao, X.; Chen, X.; Fan, L.; Jiang, Y.; Chen, Y.; Song, D.; Ling, F.; Zhong, W. Bulky Alkali Metal Cations Enabled Highly Efficient Iridium-Catalyzed Asymmetric Hydrogenation for C–N Axial Chirality via Dynamic Kinetic Resolution. *Chem. Sci.* **2026**, DOI: 10.1039/d5sc08462h.
4. Panella, L.; Aleixandre, A. M.; Kruidhof, G. J.; Robertus, J.; Feringa, B. L.; de Vries, J. G.; Minnaard, A. J. Enantioselective Rh-Catalyzed Hydrogenation of *N*-Formyl Dehydroamino Esters with Monodentate Phosphoramidite Ligands. *J. Org. Chem.* **2006**, *71*, 2026-2036.
5. Housseman, C.; Zhu, J. Mono Alkylation of  $\alpha$ -Isocyano Acetamide to Its Higher Homologues. *Synlett* **2006**, *2006*, 1777-1779.
6. Shao, R.; Zhao, H.; Ding, S.; Li, L.; Chen, C.; Wang, J.; Shang, Y. Silver-Promoted Dearomative [3+4] Cycloaddition of Anthranils with  $\alpha$ -Isocyanoacetates: Access to Benzodiazepines. *Chem. Commun.* **2022**, *58*, 4771-4774.
7. Dömling, A.; Beck, B.; Fuchs, T.; Yazbak, A. Parallel Synthesis of Arrays of Amino-Acid-Derived Isocyanoamides Useful as Starting Materials in IMCR. *J. Comb. Chem.* **2006**, *8*, 872-880.
8. He, X.; Zhao, H.; Song, X.; Jiang, B.; Du, W.; Chen, Y. Asymmetric Barton–Zard Reaction to Access 3-Pyrrole-Containing Axially Chiral Skeletons. *ACS Catal.* **2019**, *9*, 4374-4381.
9. de la Campa, R.; Ortín, I.; Dixon, D. J. Direct Catalytic Enantio- and Diastereoselective Ketone Aldol Reactions of Isocyanoacetates. *Angew. Chem. Int. Ed.* **2015**, *54*, 4895-4898.
10. de la Campa, R.; Manzano, R.; Calleja, P.; R. Ellis, S.; Dixon, D. J. *Org. Lett.*, **2018**, *20*, 6033-6036.
11. Zhao, M.; Xiang, J.; Zhao, Z.; Zhao, X.; Shi, M. *Org. Biomol. Chem.*, **2020**, *18*, 1637-1646.
12. Deng, Z.; Xie, Y.; Xiong, C.; Lv, J.; Chen, X.; Yao, J.; Zhong, W.; Ling, F. *Chem. Commun.*,

2026, DOI:10.1039/d6cc00517a.
